# Supplementary material for: Spin-state energetics of metallocenes: How do best wave function and density functional theory results compare with the experimental data?
Source: Royal Society of Chemistry journal article supplement (doi:10.1039/d0cp04727a), 2020-11-09
Supplement: d0cp04727a1.pdf [file d0cp04727a1.pdf]

**Spin-state energetics of metallocenes:  
How do best wave function and density  
functional results compare with the  
experimental data?**

Electronic Supplementary Information (ESI)

Gabriela Drabik, Janusz Szklarzewicz, and Mariusz Radoń \*

\* Corresponding author  
e-mail: [mrado@chemia.uj.edu.pl](mailto:mrado@chemia.uj.edu.pl)

## Table of contents

|                                          |    |
|------------------------------------------|----|
| 1. Full computational details            | 3  |
| 2. Geometries                            | 5  |
| 3. Vibrational corrections               | 16 |
| 4. Detailed DFT results                  | 21 |
| 5. Detailed coupled cluster results      | 34 |
| 6. Active orbitals                       | 40 |
| 7. Detailed multiconfigurational results | 43 |
| 8. Multireference character              | 63 |
| 9. Experimental spectrum of ferrocene    | 65 |
| 10. Additional references                | 71 |

# 1. Full computational details

## 1.1 DFT calculations

Single-point calculations with 30 functionals were performed either using Turbomole (TPSS, TPSSh, PBE, PBE0, LH14t-calPBE, B2PLYP), ADF (S12g, S12h, SSB-D, MVS, MVSh) or Gaussian (M06L, M06, MN15, MN15L, M11, M11L, PW6B95, B3LYP, B3LYP\*, BLYP, CAM-B3LYP, B97D, wB97XD, LCwPBE, LC-BLYP, BR, OLYP, O3LYP, OPBE). References to all functionals can be found in Section 10 of this document.

The Turbomole and Gaussian calculations employed the GTO basis set def2-QZVPP (metal, C) / def2-TZVPP (H) [S1-S3]. For ADF calculations we employed the Slater basis set ET-pVQZ (Mn, Fe, Co, C) / TZ2P (H) [S4]. For RuCp<sub>2</sub> the basis set was changed to ZORA-TZ4P (Ru, C) / ZORA-TZ2P (H), and the ZORA relativistic Hamiltonian was used as implemented in ADF [58]. The GTO (def2) basis set used for Ru in Gaussian and Turbomole calculations includes a relativistic pseudopotential [S1-S3]. For 3d-electron complexes, the relativistic correction was estimated at the second-order DKH level from separate B3LYP/cc-pVTZ(-DK) calculations performed with Gaussian (Tables S23-S25) and additively included (see Tables S26-S28); the same approach was used in ref 13.

The integration grid was “m5” in Turbomole, “UltraFine” in Gaussian, and “BeckeGrid (Quality VeryGood, RadialGridBoost 5)” in ADF. For hybrid functionals in ADF the “RIHartreeFock (Quality VeryGood)” option was used. The MP2 energy contribution to the B2PLYP functional was calculated with the RI approximation by correlating all electrons. The LH14t-calPBE functional was used within the RI-DFT approximation (as it is implemented in Turbomole).

## 1.2 WFT calculations

Table S1 defines the basis sets cT(D)-DK, cT(D)-NR, cT(D)-PP, used in this work along with the corresponding auxiliary basis sets for the F12 calculations (the auxiliary basis sets are identical as in ref 13). All F12 energies reported below includes the CABS singles correction. Total energies from all calculation can be found below in Section 5 (coupled cluster) and Section 7 (multireference).

## 1.3 Vibronic simulations

For the TI (time-independent) calculations we set MAXINT to 10<sup>9</sup>, C1MAX to 50, C2MAX to 40, and decreased both thresholds  $\epsilon_{1,2}$  to 10<sup>-12</sup>. With such settings, the recovered fraction of FC spectrum was 87% to 99%, and we were able to reach a good agreement between the TI and TD results, as shown below in Table S22 and Figures S3-S5.

Table S1. Basis sets cT(D)-DK, cT(D)-NR, cT(D)-PP, and auxiliary basis sets for F12 calculations.

|                                     | metal                              | C                               | H                               |
|-------------------------------------|------------------------------------|---------------------------------|---------------------------------|
| cT(D)-DK                            | cc-pwCVTZ-DK <sup>a</sup>          | cc-pVTZ-DK <sup>b</sup>         | cc-pVDZ-DK <sup>b</sup>         |
| cT(D)-NR                            | cc-pwCVTZ <sup>a</sup>             | cc-pVTZ <sup>c</sup>            | cc-pVDZ <sup>c</sup>            |
| cT(D)-PP                            | cc-pwCVTZ-PP <sup>d</sup>          | cc-pVTZ                         | cc-pVDZ                         |
| cT(D)-NR,df_basis <sup>e</sup>      | aug-cc-pVTZ/mp2fit <sup>f</sup>    | aug-cc-pVTZ/mp2fit <sup>g</sup> | aug-cc-pVDZ/mp2fit <sup>g</sup> |
| cT(D)-NR,df_basis_exch <sup>h</sup> | def2-TZVPP/jkfit <sup>i</sup>      | aug-cc-pVTZ/jkfit <sup>j</sup>  | aug-cc-pVDZ/jkfit <sup>j</sup>  |
| cT(D)-NR,ri_basis <sup>k</sup>      | def2-TZVPP/jkfit <sup>h</sup>      | aug-cc-pVTZ/optri <sup>l</sup>  | aug-cc-pVDZ/optri <sup>l</sup>  |
| cT(D)-PP,df_basis <sup>e</sup>      | aug-cc-pVTZ-PP/mp2fit <sup>m</sup> | aug-cc-pVTZ/mp2fit <sup>g</sup> | aug-cc-pVDZ/mp2fit <sup>g</sup> |
| cT(D)-PP,df_basis_exch <sup>h</sup> | def2-TZVPP/jkfit <sup>i</sup>      | aug-cc-pVTZ/jkfit <sup>j</sup>  | aug-cc-pVDZ/jkfit <sup>j</sup>  |
| cT(D)-PP,ri_basis <sup>k</sup>      | def2-TZVPP/jkfit <sup>h</sup>      | aug-cc-pVTZ/optri <sup>l</sup>  | aug-cc-pVDZ/optri <sup>l</sup>  |

<sup>a</sup> ref S5; <sup>b</sup> ref S8; <sup>c</sup> ref S7; <sup>d</sup> ref S6; <sup>e</sup> density fitting basis set; <sup>f</sup> ref S9; <sup>g</sup> ref S10; <sup>h</sup> density fitting basis set for the exchange and Fock operators; <sup>i</sup> ref S11; <sup>j</sup> ref S12; <sup>k</sup> basis set for RI; <sup>l</sup> ref S13, <sup>m</sup> ref S14.

## 2. Geometries

Complete dataset of geometry optimization and frequencies is also available in the ioChem-BD repository [Álvarez-Moreno et al., *J. Chem. Inf. Model.*, **2015**, 55, 95-103] under the following link: <https://doi.org/10.19061/iochem-bd-7-4>

Table S2. Cartesian coordinates for MnCp<sub>2</sub>, doublet state optimized at PBE0/def2-TZVP level (eclipsed conformation distorted to C<sub>2v</sub>)

|    |            |            |            |
|----|------------|------------|------------|
| Mn | 0.0000000  | 0.0000000  | 0.0043847  |
| C  | 0.0000000  | -1.8152137 | 1.1975619  |
| H  | 0.0000000  | -1.8322748 | 2.2777778  |
| C  | -1.1441924 | -1.7680208 | 0.3729264  |
| C  | -0.7127594 | -1.6943179 | -0.9781097 |
| C  | 0.7127594  | -1.6943179 | -0.9781097 |
| C  | 1.1441924  | -1.7680208 | 0.3729264  |
| C  | 0.0000000  | 1.8152137  | 1.1975619  |
| C  | 1.1441924  | 1.7680208  | 0.3729264  |
| C  | 0.7127594  | 1.6943179  | -0.9781097 |
| C  | -0.7127594 | 1.6943179  | -0.9781097 |
| C  | -1.1441924 | 1.7680208  | 0.3729264  |
| H  | -2.1687608 | -1.7665285 | 0.7145861  |
| H  | -1.3513990 | -1.6675495 | -1.8481688 |
| H  | 1.3513990  | -1.6675495 | -1.8481688 |
| H  | 2.1687608  | -1.7665285 | 0.7145861  |
| H  | 0.0000000  | 1.8322748  | 2.2777778  |
| H  | 2.1687608  | 1.7665285  | 0.7145861  |
| H  | 1.3513990  | 1.6675495  | -1.8481688 |
| H  | -1.3513990 | 1.6675495  | -1.8481688 |
| H  | -2.1687608 | 1.7665285  | 0.7145861  |

Table S3. Cartesian coordinates in Angstrom for MnCp<sub>2</sub>, doublet state optimized at BP86/def2-TZVP level (eclipsed conformation distorted to C<sub>2v</sub>)

|    |            |            |            |
|----|------------|------------|------------|
| Mn | 0.0000000  | 0.0000000  | 0.0081912  |
| C  | 0.0000000  | -1.8244748 | 1.2062801  |
| H  | 0.0000000  | -1.8548493 | 2.2932584  |
| C  | -1.1536348 | -1.7674145 | 0.3765074  |
| C  | -0.7202906 | -1.6778875 | -0.9871867 |
| C  | 0.7202906  | -1.6778875 | -0.9871867 |
| C  | 1.1536348  | -1.7674145 | 0.3765074  |
| C  | 0.0000000  | 1.8244748  | 1.2062801  |
| C  | 1.1536348  | 1.7674145  | 0.3765074  |
| C  | 0.7202906  | 1.6778875  | -0.9871867 |
| C  | -0.7202906 | 1.6778875  | -0.9871867 |
| C  | -1.1536348 | 1.7674145  | 0.3765074  |
| H  | -2.1845222 | -1.7740911 | 0.7216315  |
| H  | -1.3637993 | -1.6563219 | -1.8627692 |
| H  | 1.3637993  | -1.6563219 | -1.8627692 |
| H  | 2.1845222  | -1.7740911 | 0.7216315  |
| H  | 0.0000000  | 1.8548493  | 2.2932584  |
| H  | 2.1845222  | 1.7740911  | 0.7216315  |
| H  | 1.3637993  | 1.6563219  | -1.8627692 |
| H  | -1.3637993 | 1.6563219  | -1.8627692 |
| H  | -2.1845222 | 1.7740911  | 0.7216315  |

Table S4. Cartesian coordinates in Angstrom for MnCp<sub>2</sub>, sextet state optimized at PBE0/def2-TZVP level (eclipsed conformation, D<sub>5d</sub>)

|    |            |            |            |
|----|------------|------------|------------|
| Mn | -0.0000000 | 0.0000000  | 0.0000000  |
| C  | 0.0000000  | 1.2037557  | 2.0620032  |
| H  | 0.0000000  | 2.2843914  | 2.0764353  |
| C  | -0.7075498 | 0.9738588  | -2.0620032 |
| C  | -1.1448397 | 0.3719810  | 2.0620032  |
| C  | -1.1448397 | -0.3719810 | -2.0620032 |
| C  | -0.7075498 | -0.9738588 | 2.0620032  |
| C  | 0.0000000  | -1.2037557 | -2.0620032 |
| C  | 0.7075498  | -0.9738588 | 2.0620032  |
| C  | 1.1448397  | -0.3719810 | -2.0620032 |
| C  | 1.1448397  | 0.3719810  | 2.0620032  |
| C  | 0.7075498  | 0.9738588  | -2.0620032 |
| H  | -1.3427316 | 1.8481115  | -2.0764353 |
| H  | -2.1725853 | 0.7059158  | 2.0764353  |
| H  | -2.1725853 | -0.7059158 | -2.0764353 |
| H  | -1.3427316 | -1.8481115 | 2.0764353  |
| H  | 0.0000000  | -2.2843914 | -2.0764353 |
| H  | 1.3427316  | -1.8481115 | 2.0764353  |
| H  | 2.1725853  | -0.7059158 | -2.0764353 |
| H  | 2.1725853  | 0.7059158  | 2.0764353  |
| H  | 1.3427316  | 1.8481115  | -2.0764353 |

Table S5. Cartesian coordinates in Angstrom for MnCp<sub>2</sub>, sextet state at optimized BP86/def2-TZVP level (eclipsed conformation distorted to C<sub>2</sub>)

|    |            |            |            |
|----|------------|------------|------------|
| Mn | -0.0000000 | 0.0000000  | 0.4538171  |
| C  | 1.0531570  | -1.9311495 | -0.6242995 |
| H  | 1.9993888  | -1.8526654 | -1.1536095 |
| C  | 0.8958395  | -2.1121087 | 0.7804746  |
| C  | -0.5074308 | -2.1544161 | 1.0630707  |
| C  | -1.2047687 | -2.0002504 | -0.1731306 |
| C  | -0.2408129 | -1.8614228 | -1.2078113 |
| C  | 1.2047687  | 2.0002504  | -0.1731306 |
| C  | 0.2408129  | 1.8614228  | -1.2078113 |
| C  | -1.0531570 | 1.9311495  | -0.6242995 |
| C  | -0.8958395 | 2.1121087  | 0.7804746  |
| C  | 0.5074308  | 2.1544161  | 1.0630707  |
| H  | 1.6965512  | -2.2376405 | 1.5057582  |
| H  | -0.9580568 | -2.3288087 | 2.0374830  |
| H  | -2.2848191 | -1.9934222 | -0.2976192 |
| H  | -0.4568592 | -1.7062615 | -2.2617046 |
| H  | 2.2848191  | 1.9934222  | -0.2976192 |
| H  | 0.4568592  | 1.7062615  | -2.2617046 |
| H  | -1.9993888 | 1.8526654  | -1.1536095 |
| H  | -1.6965512 | 2.2376405  | 1.5057582  |
| H  | 0.9580568  | 2.3288087  | 2.0374830  |

Table S6. Cartesian coordinates in Angstrom for FeCp<sub>2</sub>, singlet ground state optimized at BP86/def2-TZVP level (eclipsed conformation, D<sub>5h</sub>).

|    |            |            |            |
|----|------------|------------|------------|
| Fe | 0.0000000  | 0.0000000  | 0.0000000  |
| C  | -1.2198992 | 0.0000000  | 1.6501014  |
| C  | -0.3769696 | -1.1601931 | 1.6501014  |
| C  | 0.9869192  | -0.7170388 | 1.6501014  |
| C  | 0.9869192  | 0.7170388  | 1.6501014  |
| C  | -0.3769696 | 1.1601931  | 1.6501014  |
| H  | -2.3063625 | 0.0000000  | 1.6353877  |
| H  | -0.7127052 | -2.1934811 | 1.6353877  |
| H  | 1.8658864  | -1.3556459 | 1.6353877  |
| H  | 1.8658864  | 1.3556459  | 1.6353877  |
| H  | -0.7127052 | 2.1934811  | 1.6353877  |
| C  | -1.2198992 | 0.0000000  | -1.6501014 |
| C  | -0.3769696 | -1.1601931 | -1.6501014 |
| C  | 0.9869192  | -0.7170388 | -1.6501014 |
| C  | 0.9869192  | 0.7170388  | -1.6501014 |
| C  | -0.3769696 | 1.1601931  | -1.6501014 |
| H  | -2.3063625 | 0.0000000  | -1.6353877 |
| H  | -0.7127052 | -2.1934811 | -1.6353877 |
| H  | 1.8658864  | -1.3556459 | -1.6353877 |
| H  | 1.8658864  | 1.3556459  | -1.6353877 |
| H  | -0.7127052 | 2.1934811  | -1.6353877 |

Table S7. Cartesian coordinates in Angstrom for FeCp<sub>2</sub>, singlet ground state optimized at PBE0/def2-TZVP level (eclipsed conformation, D<sub>5h</sub>).

|    |            |            |            |
|----|------------|------------|------------|
| Fe | 0.0000000  | 0.0000000  | -0.0000000 |
| C  | -1.2081981 | 0.0000000  | 1.6516020  |
| C  | -0.3733538 | -1.1490647 | 1.6516020  |
| C  | 0.9774528  | -0.7101610 | 1.6516020  |
| C  | 0.9774528  | 0.7101610  | 1.6516020  |
| C  | -0.3733538 | 1.1490647  | 1.6516020  |
| H  | -2.2873722 | 0.0000000  | 1.6281017  |
| H  | -0.7068369 | -2.1754202 | 1.6281017  |
| H  | 1.8505230  | -1.3444836 | 1.6281017  |
| H  | 1.8505230  | 1.3444836  | 1.6281017  |
| H  | -0.7068369 | 2.1754202  | 1.6281017  |
| C  | -1.2081981 | 0.0000000  | -1.6516020 |
| C  | -0.3733538 | -1.1490647 | -1.6516020 |
| C  | 0.9774528  | -0.7101610 | -1.6516020 |
| C  | 0.9774528  | 0.7101610  | -1.6516020 |
| C  | -0.3733538 | 1.1490647  | -1.6516020 |
| H  | -2.2873722 | 0.0000000  | -1.6281017 |
| H  | -0.7068369 | -2.1754202 | -1.6281017 |
| H  | 1.8505230  | -1.3444836 | -1.6281017 |
| H  | 1.8505230  | 1.3444836  | -1.6281017 |
| H  | -0.7068369 | 2.1754202  | -1.6281017 |

Table S8. Cartesian coordinates in Angstrom for FeCp<sub>2</sub>, triplet excited state (T<sub>1</sub>) optimized at BP86/def2-TZVP level (eclipsed conformation distorted to C<sub>2v</sub>).

|    |            |            |            |
|----|------------|------------|------------|
| Fe | 0.0000000  | 0.0000000  | 0.0508218  |
| C  | -1.8994594 | 0.0000000  | -1.2196099 |
| C  | -1.7982169 | -1.1445806 | -0.3842855 |
| C  | -1.7881323 | -0.7104224 | 0.9917145  |
| C  | -1.7881323 | 0.7104224  | 0.9917145  |
| C  | -1.7982169 | 1.1445806  | -0.3842855 |
| H  | -1.9012479 | 0.0000000  | -2.3063672 |
| H  | -1.7994916 | -2.1791636 | -0.7182122 |
| H  | -1.7849683 | -1.3617603 | 1.8610662  |
| H  | -1.7849683 | 1.3617603  | 1.8610662  |
| H  | -1.7994916 | 2.1791636  | -0.7182122 |
| C  | 1.8994594  | 0.0000000  | -1.2196099 |
| C  | 1.7982169  | -1.1445806 | -0.3842855 |
| C  | 1.7881323  | -0.7104224 | 0.9917145  |
| C  | 1.7881323  | 0.7104224  | 0.9917145  |
| C  | 1.7982169  | 1.1445806  | -0.3842855 |
| H  | 1.9012479  | 0.0000000  | -2.3063672 |
| H  | 1.7994916  | -2.1791636 | -0.7182122 |
| H  | 1.7849683  | -1.3617603 | 1.8610662  |
| H  | 1.7849683  | 1.3617603  | 1.8610662  |
| H  | 1.7994916  | 2.1791636  | -0.7182122 |

Table S9. Cartesian coordinates in Angstrom for FeCp<sub>2</sub>, triplet excited state (T<sub>1</sub>) optimized at PBE0/def2-TZVP level (eclipsed conformation distorted to C<sub>2v</sub>).

|    |            |            |            |
|----|------------|------------|------------|
| Fe | 0.0000000  | 0.0000000  | 0.0321592  |
| C  | -1.8948801 | 0.0000000  | -1.2095604 |
| C  | -1.8116043 | -1.1355480 | -0.3793778 |
| C  | -1.8074633 | -0.7033090 | 0.9832655  |
| C  | -1.8074633 | 0.7033090  | 0.9832655  |
| C  | -1.8116043 | 1.1355480  | -0.3793778 |
| H  | -1.8961098 | 0.0000000  | -2.2894992 |
| H  | -1.8070380 | -2.1636580 | -0.7111738 |
| H  | -1.7973307 | -1.3484443 | 1.8487761  |
| H  | -1.7973307 | 1.3484443  | 1.8487761  |
| H  | -1.8070380 | 2.1636580  | -0.7111738 |
| C  | 1.8948801  | 0.0000000  | -1.2095604 |
| C  | 1.8116043  | -1.1355480 | -0.3793778 |
| C  | 1.8074633  | -0.7033090 | 0.9832655  |
| C  | 1.8074633  | 0.7033090  | 0.9832655  |
| C  | 1.8116043  | 1.1355480  | -0.3793778 |
| H  | 1.8961098  | 0.0000000  | -2.2894992 |
| H  | 1.8070380  | -2.1636580 | -0.7111738 |
| H  | 1.7973307  | -1.3484443 | 1.8487761  |
| H  | 1.7973307  | 1.3484443  | 1.8487761  |
| H  | 1.8070380  | 2.1636580  | -0.7111738 |



Table S10. Cartesian coordinates in Angstrom for [CoCp<sub>2</sub>]<sup>+</sup>, singlet ground state optimized at BP86/def2-TZVP level (eclipsed conformation, D<sub>5h</sub>)

|    |            |            |            |
|----|------------|------------|------------|
| Co | 0.0000000  | -0.0000000 | 0.0000000  |
| C  | 1.2188782  | 0.0000000  | 1.6545782  |
| H  | 2.3051570  | 0.0000000  | 1.6353329  |
| C  | 0.3766541  | 1.1592221  | 1.6545782  |
| C  | -0.9860932 | 0.7164386  | 1.6545782  |
| C  | -0.9860932 | -0.7164386 | 1.6545782  |
| C  | 0.3766541  | -1.1592221 | 1.6545782  |
| C  | 1.2188782  | 0.0000000  | -1.6545782 |
| C  | 0.3766541  | -1.1592221 | -1.6545782 |
| C  | -0.9860932 | -0.7164386 | -1.6545782 |
| C  | -0.9860932 | 0.7164386  | -1.6545782 |
| C  | 0.3766541  | 1.1592221  | -1.6545782 |
| H  | 0.7123327  | 2.1923346  | 1.6353329  |
| H  | -1.8649112 | 1.3549373  | 1.6353329  |
| H  | -1.8649112 | -1.3549373 | 1.6353329  |
| H  | 0.7123327  | -2.1923346 | 1.6353329  |
| H  | 2.3051570  | 0.0000000  | -1.6353329 |
| H  | 0.7123327  | -2.1923346 | -1.6353329 |
| H  | -1.8649112 | -1.3549373 | -1.6353329 |
| H  | -1.8649112 | 1.3549373  | -1.6353329 |
| H  | 0.7123327  | 2.1923346  | -1.6353329 |

Table S11. Cartesian coordinates in Angstrom for [CoCp<sub>2</sub>]<sup>+</sup>, singlet ground state optimized at PBE0/def2-TZVP level (eclipsed conformation, D<sub>5h</sub>)

|    |            |            |            |
|----|------------|------------|------------|
| Co | -0.0000000 | -0.0000000 | 0.0000000  |
| C  | 1.2079519  | 0.0000000  | 1.6426949  |
| H  | 2.2872673  | 0.0000000  | 1.6133697  |
| C  | 0.3732777  | 1.1488305  | 1.6426949  |
| C  | -0.9772536 | 0.7100163  | 1.6426949  |
| C  | -0.9772536 | -0.7100163 | 1.6426949  |
| C  | 0.3732777  | -1.1488305 | 1.6426949  |
| C  | 1.2079519  | 0.0000000  | -1.6426949 |
| C  | 0.3732777  | -1.1488305 | -1.6426949 |
| C  | -0.9772536 | -0.7100163 | -1.6426949 |
| C  | -0.9772536 | 0.7100163  | -1.6426949 |
| C  | 0.3732777  | 1.1488305  | -1.6426949 |
| H  | 0.7068045  | 2.1753205  | 1.6133697  |
| H  | -1.8504381 | 1.3444220  | 1.6133697  |
| H  | -1.8504381 | -1.3444220 | 1.6133697  |
| H  | 0.7068045  | -2.1753205 | 1.6133697  |
| H  | 2.2872673  | 0.0000000  | -1.6133697 |
| H  | 0.7068045  | -2.1753205 | -1.6133697 |
| H  | -1.8504381 | -1.3444220 | -1.6133697 |
| H  | -1.8504381 | 1.3444220  | -1.6133697 |
| H  | 0.7068045  | 2.1753205  | -1.6133697 |

Table S12. Cartesian coordinates in Angstrom for [CoCp<sub>2</sub>]<sup>+</sup>, triplet excited state (T<sub>1</sub>) optimized at BP86/def2-TZVP level (eclipsed conformation distorted to C<sub>2v</sub>).

|    |            |            |            |
|----|------------|------------|------------|
| Co | 0.0000000  | 0.0000000  | 0.1662965  |
| C  | -1.9680294 | 0.0000000  | 1.2009853  |
| H  | -2.0765993 | 0.0000000  | 2.2829010  |
| C  | -1.8006396 | 1.1485240  | 0.3756728  |
| C  | -1.6872851 | 0.7053479  | -0.9989880 |
| C  | -1.6872851 | -0.7053479 | -0.9989880 |
| C  | -1.8006396 | -1.1485240 | 0.3756728  |
| C  | 1.9680294  | 0.0000000  | 1.2009853  |
| C  | 1.8006396  | -1.1485240 | 0.3756728  |
| C  | 1.6872851  | -0.7053479 | -0.9989880 |
| C  | 1.6872851  | 0.7053479  | -0.9989880 |
| C  | 1.8006396  | 1.1485240  | 0.3756728  |
| H  | -1.8333578 | 2.1837731  | 0.7053009  |
| H  | -1.5978441 | 1.3543773  | -1.8655029 |
| H  | -1.5978441 | -1.3543773 | -1.8655029 |
| H  | -1.8333578 | -2.1837731 | 0.7053009  |
| H  | 2.0765993  | 0.0000000  | 2.2829010  |
| H  | 1.8333578  | -2.1837731 | 0.7053009  |
| H  | 1.5978441  | -1.3543773 | -1.8655029 |
| H  | 1.5978441  | 1.3543773  | -1.8655029 |
| H  | 1.8333578  | 2.1837731  | 0.7053009  |

Table S13. Cartesian coordinates in Angstrom for [CoCp<sub>2</sub>]<sup>+</sup>, triplet excited state (T<sub>1</sub>) optimized at PBE0/def2-TZVP level (eclipsed conformation distorted to C<sub>2v</sub>).

|    |            |            |            |
|----|------------|------------|------------|
| Co | 0.0000000  | 0.0000000  | -0.0004515 |
| C  | -1.8653634 | 0.0000000  | 1.2140988  |
| H  | -1.8853532 | 0.0000000  | 2.2938466  |
| C  | -1.7887528 | 1.1361147  | 0.3818028  |
| C  | -1.7779960 | 0.6986649  | -0.9909284 |
| C  | -1.7779960 | -0.6986649 | -0.9909284 |
| C  | -1.7887528 | -1.1361147 | 0.3818028  |
| C  | 1.8653634  | 0.0000000  | 1.2140988  |
| C  | 1.7887528  | -1.1361147 | 0.3818028  |
| C  | 1.7779960  | -0.6986649 | -0.9909284 |
| C  | 1.7779960  | 0.6986649  | -0.9909284 |
| C  | 1.7887528  | 1.1361147  | 0.3818028  |
| H  | -1.7856965 | 2.1655683  | 0.7108488  |
| H  | -1.7608016 | 1.3452849  | -1.8555830 |
| H  | -1.7608016 | -1.3452849 | -1.8555830 |
| H  | -1.7856965 | -2.1655683 | 0.7108488  |
| H  | 1.8853532  | 0.0000000  | 2.2938466  |
| H  | 1.7856965  | -2.1655683 | 0.7108488  |
| H  | 1.7608016  | -1.3452849 | -1.8555830 |
| H  | 1.7608016  | 1.3452849  | -1.8555830 |
| H  | 1.7856965  | 2.1655683  | 0.7108488  |

Table S14. Cartesian coordinates in Angstrom for RuCp<sub>2</sub>, singlet ground state optimized at BP86/def2-TZVP level (eclipsed conformation, D<sub>5h</sub>)

|    |            |            |            |
|----|------------|------------|------------|
| Ru | 0.0000000  | 0.0000000  | 0.0000000  |
| C  | 1.2218861  | 0.0000000  | 1.8159510  |
| H  | 2.3080643  | 0.0000000  | 1.8282169  |
| C  | 0.3775836  | 1.1620827  | 1.8159510  |
| C  | -0.9885266 | 0.7182066  | 1.8159510  |
| C  | -0.9885266 | -0.7182066 | 1.8159510  |
| C  | 0.3775836  | -1.1620827 | 1.8159510  |
| C  | 1.2218861  | 0.0000000  | -1.8159510 |
| C  | 0.3775836  | -1.1620827 | -1.8159510 |
| C  | -0.9885266 | -0.7182066 | -1.8159510 |
| C  | -0.9885266 | 0.7182066  | -1.8159510 |
| C  | 0.3775836  | 1.1620827  | -1.8159510 |
| H  | 0.7132311  | 2.1950996  | 1.8282169  |
| H  | -1.8672633 | 1.3566462  | 1.8282169  |
| H  | -1.8672633 | -1.3566462 | 1.8282169  |
| H  | 0.7132311  | -2.1950996 | 1.8282169  |
| H  | 2.3080643  | 0.0000000  | -1.8282169 |
| H  | 0.7132311  | -2.1950996 | -1.8282169 |
| H  | -1.8672633 | -1.3566462 | -1.8282169 |
| H  | -1.8672633 | 1.3566462  | -1.8282169 |
| H  | 0.7132311  | 2.1950996  | -1.8282169 |

Table S15. Cartesian coordinates in Angstrom for RuCp<sub>2</sub>, singlet ground state optimized at PBE0/def2-TZVP level (eclipsed conformation, D<sub>5h</sub>)

|    |            |            |            |
|----|------------|------------|------------|
| Ru | -0.0000000 | -0.0000000 | 0.0000000  |
| C  | 1.2118803  | 0.0000000  | 1.7990841  |
| H  | 2.2912112  | 0.0000000  | 1.8074587  |
| C  | 0.3744916  | 1.1525666  | 1.7990841  |
| C  | -0.9804317 | 0.7123254  | 1.7990841  |
| C  | -0.9804317 | -0.7123254 | 1.7990841  |
| C  | 0.3744916  | -1.1525666 | 1.7990841  |
| C  | 1.2118803  | 0.0000000  | -1.7990841 |
| C  | 0.3744916  | -1.1525666 | -1.7990841 |
| C  | -0.9804317 | -0.7123254 | -1.7990841 |
| C  | -0.9804317 | 0.7123254  | -1.7990841 |
| C  | 0.3744916  | 1.1525666  | -1.7990841 |
| H  | 0.7080232  | 2.1790714  | 1.8074587  |
| H  | -1.8536288 | 1.3467402  | 1.8074587  |
| H  | -1.8536288 | -1.3467402 | 1.8074587  |
| H  | 0.7080232  | -2.1790714 | 1.8074587  |
| H  | 2.2912112  | 0.0000000  | -1.8074587 |
| H  | 0.7080232  | -2.1790714 | -1.8074587 |
| H  | -1.8536288 | -1.3467402 | -1.8074587 |
| H  | -1.8536288 | 1.3467402  | -1.8074587 |
| H  | 0.7080232  | 2.1790714  | -1.8074587 |

Table S16. Cartesian coordinates for RuCp<sub>2</sub>, lowest triplet excited state T<sub>1</sub> optimized at BP86/def2-TZVP level (distorted to C<sub>2</sub>).

|    |            |            |            |
|----|------------|------------|------------|
| Ru | 0.0000000  | 0.0000000  | -0.4202308 |
| C  | -1.7928378 | 0.1012715  | 1.2302439  |
| H  | -1.6149528 | 0.2549532  | 2.2902983  |
| C  | -1.8754994 | 1.1280599  | 0.2277546  |
| C  | -2.0930581 | 0.5056469  | -1.0437380 |
| C  | -1.9978345 | -0.9155243 | -0.8576720 |
| C  | -1.7628860 | -1.1439043 | 0.5435679  |
| C  | 1.7928378  | -0.1012715 | 1.2302439  |
| C  | 1.8754994  | -1.1280599 | 0.2277546  |
| C  | 2.0930581  | -0.5056469 | -1.0437380 |
| C  | 1.9978345  | 0.9155243  | -0.8576720 |
| C  | 1.7628860  | 1.1439043  | 0.5435679  |
| H  | -1.8911111 | 2.1988166  | 0.4113600  |
| H  | -2.2723786 | 1.0251631  | -1.9812230 |
| H  | -2.1368894 | -1.6830997 | -1.6129984 |
| H  | -1.6462833 | -2.1223098 | 1.0025222  |
| H  | 1.6149528  | -0.2549532 | 2.2902983  |
| H  | 1.8911111  | -2.1988166 | 0.4113600  |
| H  | 2.2723786  | -1.0251631 | -1.9812230 |
| H  | 2.1368894  | 1.6830997  | -1.6129984 |
| H  | 1.6462833  | 2.1223098  | 1.0025222  |

Table S17. Cartesian coordinates for RuCp<sub>2</sub>, lowest triplet excited state T<sub>1</sub> optimized at BP86/def2-TZVP level (eclipsed distorted to C<sub>2v</sub> with an imaginary frequency; the “BP86\*” structure).

|    |            |            |            |
|----|------------|------------|------------|
| Ru | 0.0000000  | 0.0000000  | -0.4114325 |
| C  | -1.7943046 | 0.0000000  | 1.2415824  |
| H  | -1.6126724 | 0.0000000  | 2.3120160  |
| C  | -1.8204104 | 1.1476721  | 0.3890183  |
| C  | -2.0532921 | 0.7181613  | -0.9606003 |
| C  | -2.0532921 | -0.7181613 | -0.9606003 |
| C  | -1.8204104 | -1.1476721 | 0.3890183  |
| C  | 1.7943046  | 0.0000000  | 1.2415824  |
| C  | 1.8204104  | -1.1476721 | 0.3890183  |
| C  | 2.0532921  | -0.7181613 | -0.9606003 |
| C  | 2.0532921  | 0.7181613  | -0.9606003 |
| C  | 1.8204104  | 1.1476721  | 0.3890183  |
| H  | -1.7681753 | 2.1837592  | 0.7127595  |
| H  | -2.2151842 | 1.3688863  | -1.8151185 |
| H  | -2.2151842 | -1.3688863 | -1.8151185 |
| H  | -1.7681753 | -2.1837592 | 0.7127595  |
| H  | 1.6126724  | 0.0000000  | 2.3120160  |
| H  | 1.7681753  | -2.1837592 | 0.7127595  |
| H  | 2.2151842  | -1.3688863 | -1.8151185 |
| H  | 2.2151842  | 1.3688863  | -1.8151185 |
| H  | 1.7681753  | 2.1837592  | 0.7127595  |

Table S18. Cartesian coordinates for RuCp<sub>2</sub>, lowest triplet excited state T<sub>1</sub> optimized at PBE0/def2-TZVP level (eclipsed conformation distorted to C<sub>2v</sub>).

|    |            |            |            |
|----|------------|------------|------------|
| Ru | 0.0000000  | 0.0000000  | -0.1264330 |
| C  | -2.0250281 | 0.0000000  | 1.2190229  |
| H  | -2.0066822 | 0.0000000  | 2.2986369  |
| C  | -1.9289300 | 1.1359722  | 0.3835563  |
| C  | -1.9646372 | 0.7075942  | -0.9804475 |
| C  | -1.9646372 | -0.7075942 | -0.9804475 |
| C  | -1.9289300 | -1.1359722 | 0.3835563  |
| C  | 2.0250281  | 0.0000000  | 1.2190229  |
| C  | 1.9289300  | -1.1359722 | 0.3835563  |
| C  | 1.9646372  | -0.7075942 | -0.9804475 |
| C  | 1.9646372  | 0.7075942  | -0.9804475 |
| C  | 1.9289300  | 1.1359722  | 0.3835563  |
| H  | -1.9300578 | 2.1649020  | 0.7123345  |
| H  | -2.0044180 | 1.3556059  | -1.8426649 |
| H  | -2.0044180 | -1.3556059 | -1.8426649 |
| H  | -1.9300578 | -2.1649020 | 0.7123345  |
| H  | 2.0066822  | 0.0000000  | 2.2986369  |
| H  | 1.9300578  | -2.1649020 | 0.7123345  |
| H  | 2.0044180  | -1.3556059 | -1.8426649 |
| H  | 2.0044180  | 1.3556059  | -1.8426649 |
| H  | 1.9300578  | 2.1649020  | 0.7123345  |

Table S19. Cartesian coordinates for RuCp<sub>2</sub>, lowest triplet excited state T<sub>1</sub> optimized at UHF-CCSD(T)/cT(D)-PP level (eclipsed conformation distorted to C<sub>2v</sub>).

|    |           |           |           |
|----|-----------|-----------|-----------|
| Ru | 0.0000000 | 0.0000000 | 0.0000000 |
| C  | 2.046376  | 0.0000000 | -1.300217 |
| C  | -2.046376 | 0.0000000 | -1.300217 |
| C  | 1.939563  | -1.142962 | -0.462880 |
| C  | 1.939563  | 1.142962  | -0.462880 |
| C  | -1.939563 | 1.142962  | -0.462880 |
| C  | -1.939563 | -1.142962 | -0.462880 |
| C  | 1.954748  | -0.710255 | 0.910350  |
| C  | 1.954748  | 0.710255  | 0.910350  |
| C  | -1.954748 | 0.710255  | 0.910350  |
| C  | -1.954748 | -0.710255 | 0.910350  |
| H  | 2.046445  | 0.0000000 | -2.384316 |
| H  | -2.046445 | 0.0000000 | -2.384316 |
| H  | 1.950510  | -2.175687 | -0.792880 |
| H  | 1.950510  | 2.175687  | -0.792880 |
| H  | -1.950510 | 2.175687  | -0.792880 |
| H  | -1.950510 | -2.175687 | -0.792880 |
| H  | 1.976990  | -1.360426 | 1.776610  |
| H  | 1.976990  | 1.360426  | 1.776610  |
| H  | -1.976990 | 1.360426  | 1.776610  |
| H  | -1.976990 | -1.360426 | 1.776610  |

Table S20. Z-matrix used to optimize geometry of T<sub>1</sub> state for RuCp<sub>2</sub> at the CCSD(T) level with the CFour program. Final values of the optimized parameters (\*) are listed.

```

Ru
X 1 RRX1
X 1 RRX* 2 A90
X 1 RRX* 2 A90 3 D180
C 3 RXC1* 1 ARXC* 2 D180
C 4 RXC1* 1 ARXC* 2 D180
C 3 RXC2* 5 A72A* 1 D90
C 3 RXC2* 5 A72A* 7 D180
C 4 RXC2* 6 A72A* 1 D90
C 4 RXC2* 6 A72A* 9 D180
X 3 RXX 1 ARXX* 2 D0
X 4 RXX 1 ARXX* 2 D0
C 3 RXC3* 7 A72B* 11 D0
C 3 RXC3* 8 A72B* 11 D0
C 4 RXC3* 9 A72B* 12 D0
C 4 RXC3* 10 A72B* 12 D0
H 5 RCH1* 1 ARCH1* 2 D180
H 6 RCH1* 1 ARCH1* 2 D180
X 1 RRX1 2 A108A* 3 D90
X 1 RRX1 2 A108A* 19 D180
H 7 RCH2* 1 ARCH2* 19 D0
H 8 RCH2* 1 ARCH2* 20 D0
H 9 RCH2* 1 ARCH2* 20 D0
H 10 RCH2* 1 ARCH2* 19 D0
X 1 RRX1 2 A36A* 3 D90
X 1 RRX1 2 A36A* 25 D180
H 13 RCH3* 1 ARCH3* 25 D0
H 14 RCH3* 1 ARCH3* 26 D0
H 15 RCH3* 1 ARCH3* 26 D0
H 16 RCH3* 1 ARCH3* 25 D0

RRX1 = 1.0000000000000000
RRX = 1.880516883692004
A90 = 90.0000000000000000
D180 = 180.0000000000000000
RXC1 = 1.310753390581075
ARXC = 97.269530276269620
RXC2 = 1.234546567766365
A72A = 67.791545890431593
D90 = 90.0000000000000014
RXX = 1.0000000000000000
ARXX = 91.794773138777956
D0 = 0.0000000000000000
RXC3 = 1.157025981898399
A72B = 73.955197780349110
RCH1 = 1.084098269805931
ARCH1= 122.434554635556111
A108A= 107.692974205741422
RCH2 = 1.084223520403107
ARCH2= 122.921461864473528
A36A = 36.876869293214803
RCH3 = 1.083338853378630
ARCH3= 121.740158175388146

```

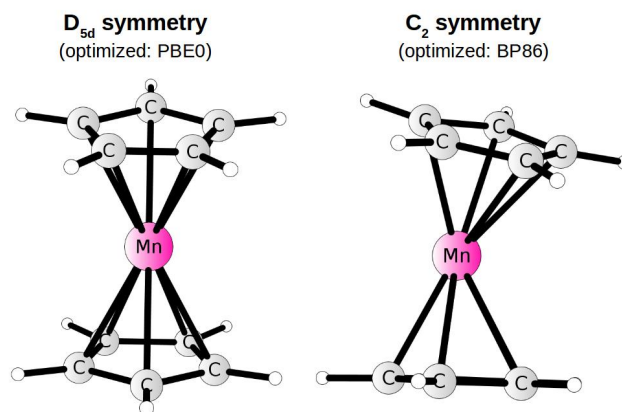

Figure S1. Structures of  ${}^6[\text{MnCp}_2]$  optimized with PBE0 (*left*) and BP86 (*right*) functionals.

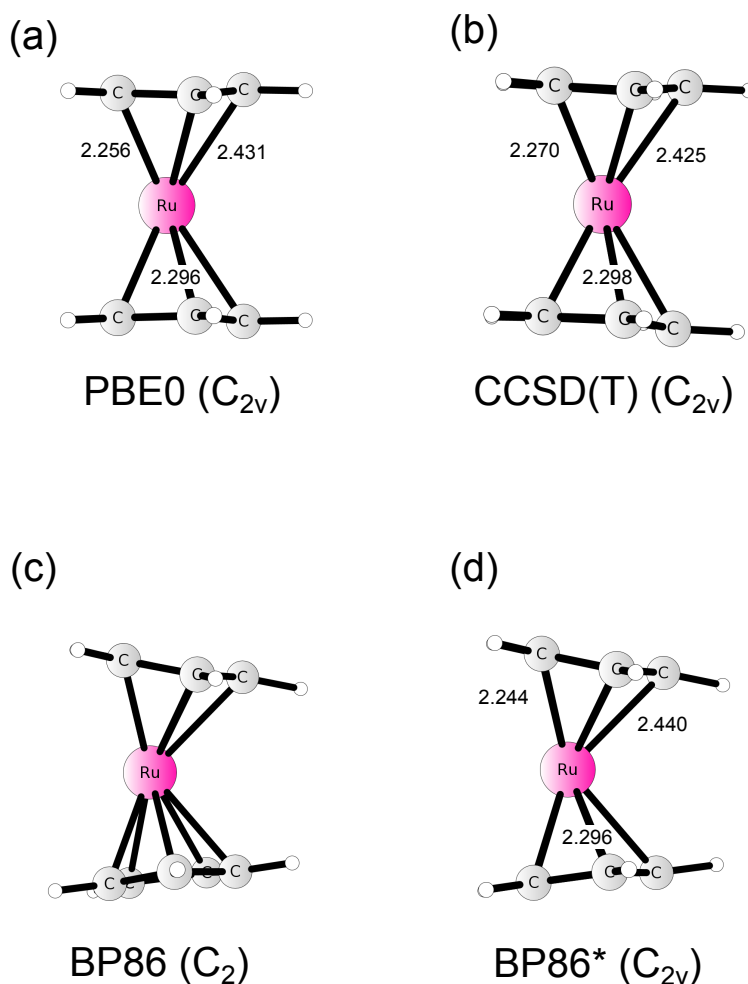

Figure S2. Structures of  ${}^3[\text{RuCp}_2]$  ( $T_1$  state) optimized at various theory levels: (a) PBE0/def2-TZVP; (b) UHF-CCSD(T)/cT(D)-PP; (c) BP86/def2-TZVP. Panel (d) called “BP86\*” the same as theory level as (c), but with the geometry constrained to  $C_{2v}$  symmetry, so that imaginary frequency of  $i7\text{ cm}^{-1}$  appears, but the energy is higher than the fully optimized one ( $C_2$  symmetry) only by  $0.006\text{ kcal/mol}$ . Numbers annotated on structures in (a), (b) and (d) are the Ru-C bond lengths in Angstrom.

### 3. Vibrational corrections

Table S21. Enthalpy correction for doublet  $\rightleftharpoons$  sextet SCO equilibrium of MnCp<sub>2</sub>.

|                            | $H - E_e$ (kJ/mol) |         | $\Delta H - \Delta E_e$<br>(eV) |
|----------------------------|--------------------|---------|---------------------------------|
|                            | (S=1/2)            | (S=5/2) |                                 |
| PBE0, T=212K <sup>a</sup>  | 458.38             | 452.87  | -0.06                           |
| PBE0, T=298 K              | 470.26             | 465.67  | -0.05                           |
| BP86, T=212 K <sup>a</sup> | 441.60             | 438.27  | -0.03                           |

<sup>a</sup> T=212 K is the T(1/2) temperature calculated as (experimental)  $\Delta H/\Delta S$  ratio.

Table S22. Vibronic corrections to vertical energies determined with FCclasses v.3 using PBE0 or BP86/def2-TZVP geometries and harmonic frequencies. All energy values in eV.

|                                                                | Ru(Cp) <sub>2</sub> , S <sub>0</sub> → T <sub>1</sub> |         |                | Ru(Cp) <sub>2</sub> , T <sub>1</sub> → S <sub>0</sub> | Fe(Cp) <sub>2</sub> , S <sub>0</sub> → T <sub>1</sub> |                | [Co(Cp) <sub>2</sub> ] <sup>+</sup> , S <sub>0</sub> → T <sub>1</sub> |                |
|----------------------------------------------------------------|-------------------------------------------------------|---------|----------------|-------------------------------------------------------|-------------------------------------------------------|----------------|-----------------------------------------------------------------------|----------------|
|                                                                | PBE0                                                  | BP86*   | BP86           | PBE0                                                  | PBE0                                                  | BP86           | PBE0                                                                  | BP86           |
| $\Delta E_{\text{ad}}$ <sup>a</sup>                            | 2.6215                                                | 2.6275  | 2.6273         | 2.6215                                                | 0.8194                                                | 1.5109         | 1.2752                                                                | 1.9559         |
| $\Delta E_{\text{vert}}$ <sup>b</sup>                          | 3.4530                                                | 3.4390  | 3.4388         | 1.7315                                                | 1.5503                                                | 2.1585         | 1.9273                                                                | 2.5448         |
| $\Delta ZPE$ <sup>c</sup>                                      | -0.1132                                               | -0.1054 | -0.1066        | -0.1132                                               | -0.1030                                               | -0.0966        | -0.1331                                                               | -0.1020        |
| $\Delta E_{\text{vert}}^{\text{harm}}$ <sup>d</sup>            | 3.3622                                                | 3.8186  | 3.9786         | 1.4704                                                | 1.4124                                                | 2.0640         | 1.8096                                                                | 2.5543         |
| $\Delta E_{\text{max}}^{\text{harm}}$ (0K), TD <sup>e</sup>    | 3.2525                                                | 3.7075  | 3.845          | 1.5100                                                | 1.3200                                                | 1.9600         | 1.6850                                                                | 2.4450         |
| $\Delta E_{\text{max}}^{\text{harm}}$ (0K), TI <sup>e</sup>    | 3.2450                                                | na      | na             | 1.5225                                                | 1.3200                                                | 1.9600         | 1.6850                                                                | 2.4375         |
| % FC spec. TI (0K) <sup>f</sup>                                | 93.0                                                  | na      | na             | 86.8                                                  | 98.4                                                  | 98.6           | 98.7                                                                  | 92.7           |
| $\Delta E_{\text{max}}^{\text{harm}}$ , TD (300K) <sup>e</sup> | 3.2550                                                | 3.7100  | 3.865          | 1.4450                                                | 1.3200                                                | 1.9575         | 1.6875                                                                | 2.4425         |
| $\delta^{\text{harm}}$ (0K) <sup>g</sup>                       | -0.1097                                               | -0.1111 | <b>-0.1336</b> | <b>0.0396</b>                                         | -0.0924                                               | <b>-0.1040</b> | -0.1246                                                               | <b>-0.1093</b> |
| $\delta^{\text{harm}}$ (300 K) <sup>g</sup>                    | -0.1072                                               | -0.1086 | -0.1136        | -0.0254                                               | -0.0924                                               | -0.1065        | -0.1221                                                               | -0.1118        |

<sup>a</sup> Adiabatic energy  $E(T_1) - E(S_0)$  at the DFT level. <sup>b</sup> Vertical energy  $E(T_1) - E(S_0)$  at the DFT level. <sup>c</sup> Zero-point energy difference  $ZPE(T_1) - ZPE(S_0)$  at the DFT level. <sup>d</sup> Harmonic approximation of the vertical energy based on DFT geometries and frequencies. <sup>e</sup> Maximum of the spectrum simulated with FCclasses using TD or TI approach, at given temperature. <sup>f</sup> Percentage of Franck-Condon spectrum recovered using TI approach at temperature 0 K. <sup>g</sup> Vibronic correction to vertical energy (see main article); calculated as the difference between the maximum of the simulated spectrum and corresponding harmonic approximation of the vertical energy,  $\delta^{\text{harm}} = \Delta E_{\text{max}}^{\text{harm}} - \Delta E_{\text{vert}}^{\text{harm}}$ , at given temperature.

“BP86\*” - For this BP86 optimization the geometry of T<sub>1</sub> state was constrained to C<sub>2v</sub> symmetry instead of true C<sub>2</sub> symmetry (see main article); resulting imaginary frequency of  $i6.75 \text{ cm}^{-1}$  was converted to  $+6.75 \text{ cm}^{-1}$ .

“na” = not available because the calculations did not converge.



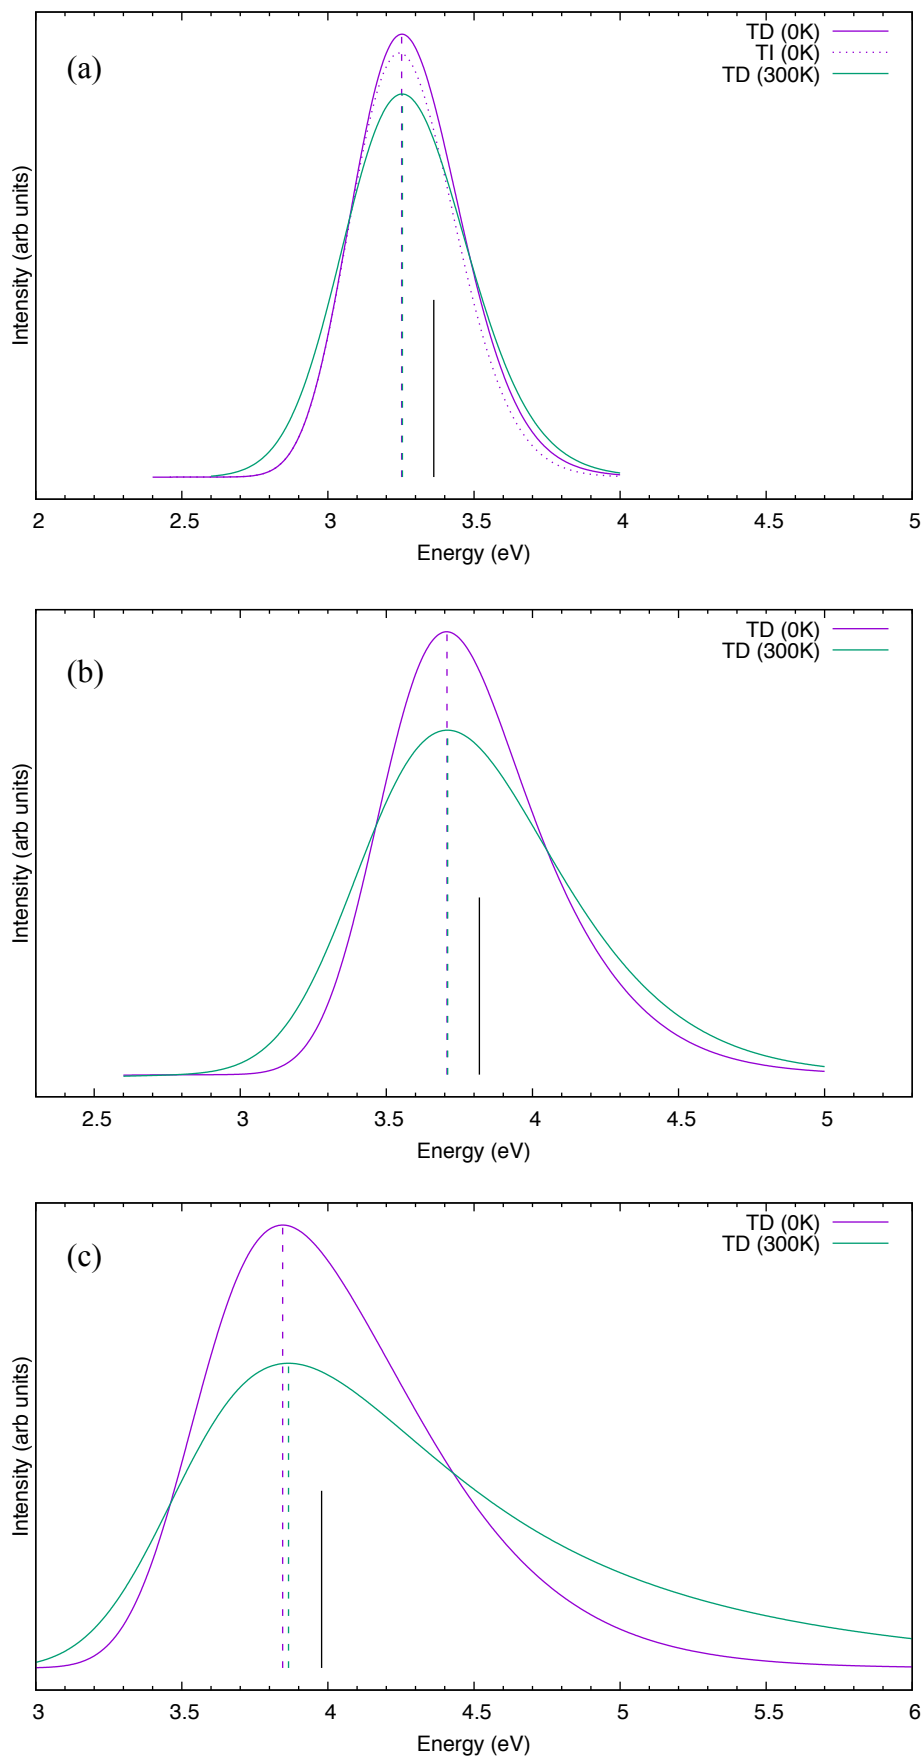

Figure S3. Vibrational progressions of  $S_0 \rightarrow T_1$  band for RuCp<sub>2</sub> simulated from on (a) PBE0, (b) BP86\*, and (c) BP86 data (adiab. energy, geometries and harmonic freq.). Black vertical line is harmonic vertical energy of each method. Acronym “BP86\*” explained in prev. table.

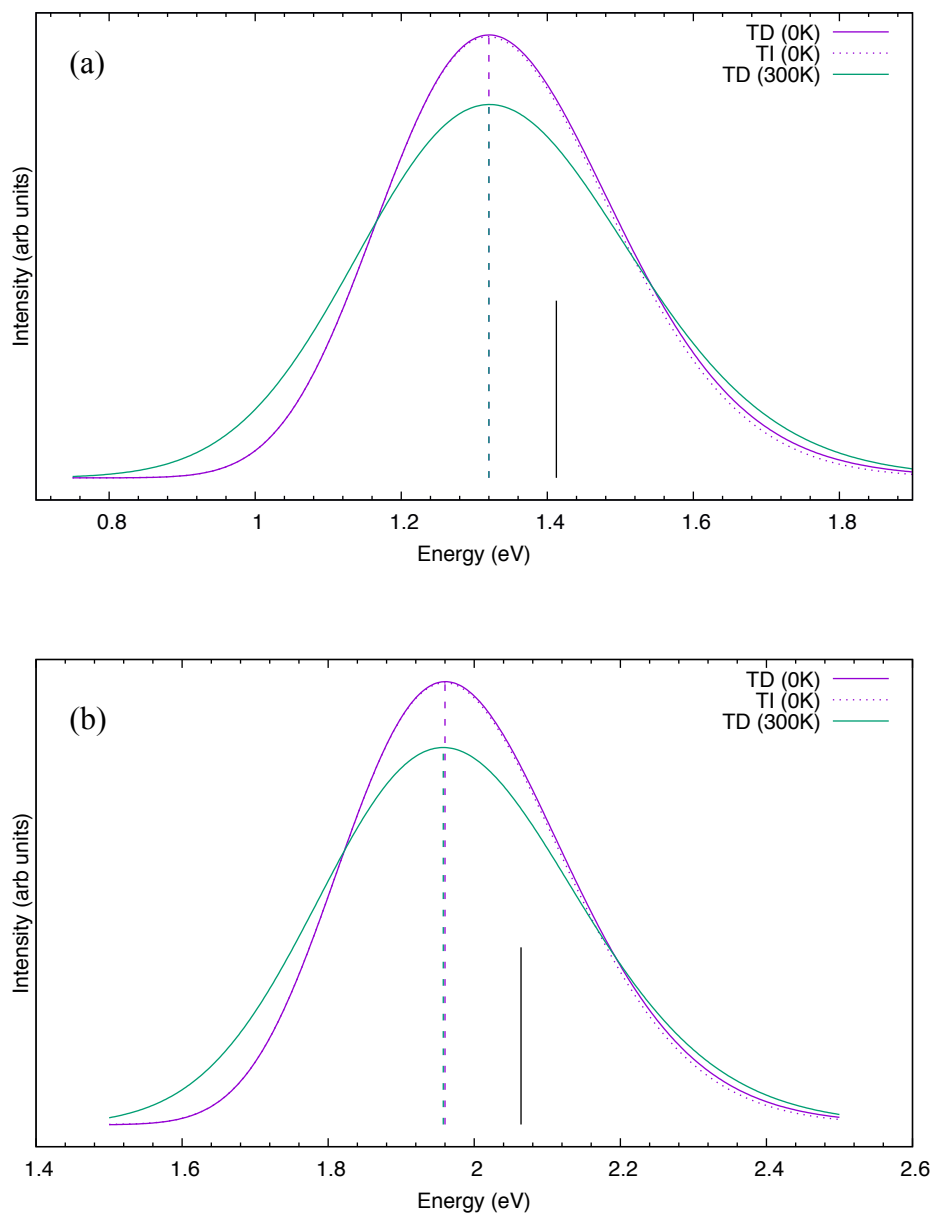

Figure S4. Vibrational progressions of  $S_0 \rightarrow T_1$  band for  $FeCp_2$  simulated from on (a) PBE0 and (b) BP86 data (adiabatic energy, geometries and harmonic frequencies). Black vertical line is harmonic vertical energy of each method.

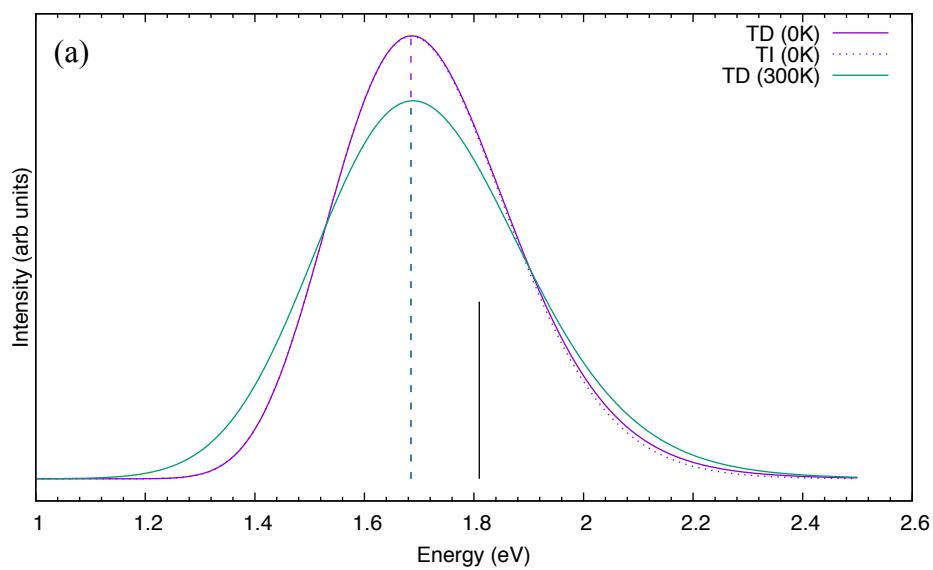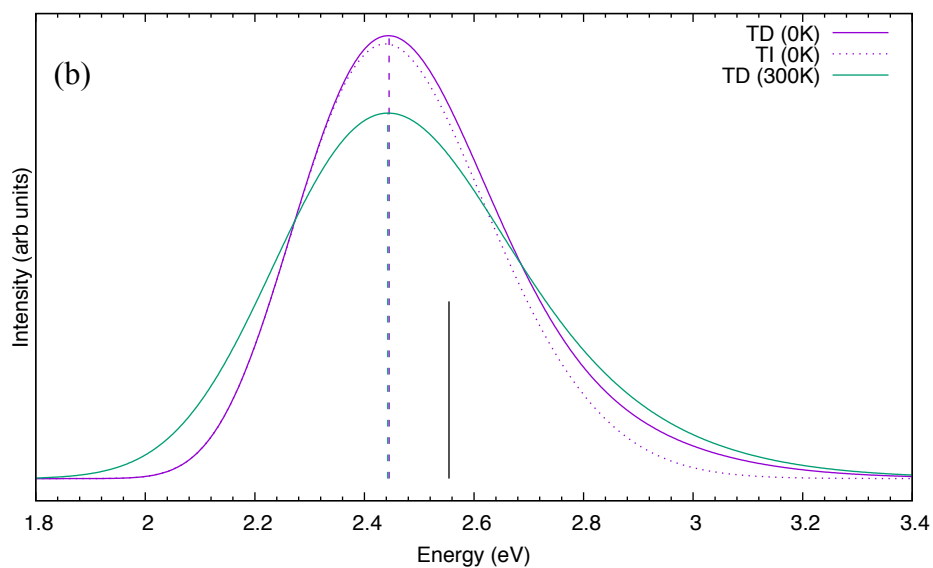

Figure S5. Vibrational progressions of  $S_0 \rightarrow T_1$  band for  $\text{FeCp}_2$  simulated from on (a) PBE0 and (b) BP86 data (adiabatic energy, geometries and harmonic frequencies). Black vertical line is harmonic vertical energy for each method.

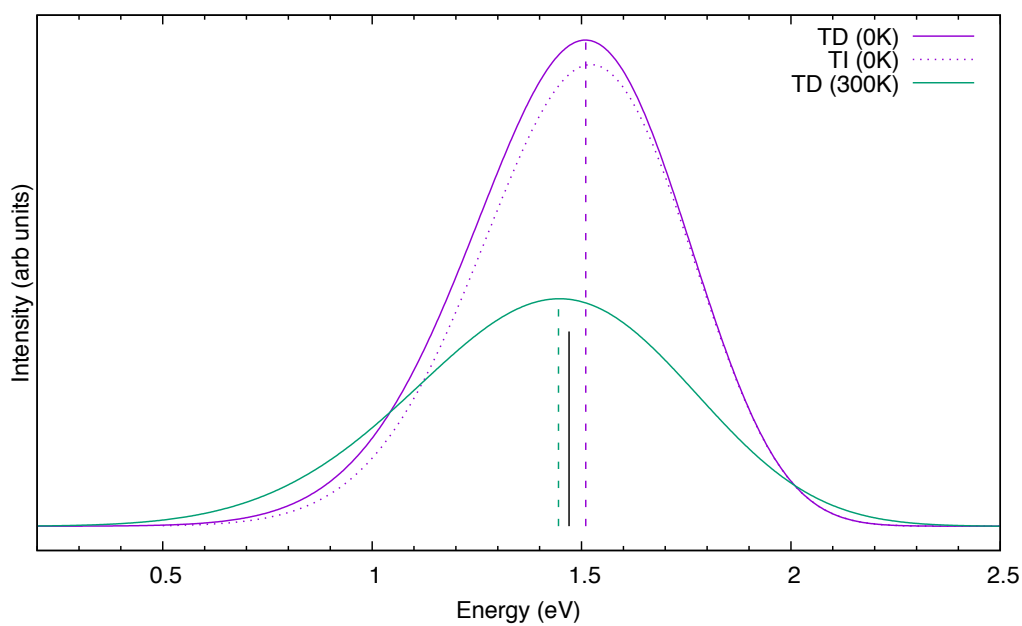

Figure S6. Vibrational progressions of  $T_1 \rightarrow S_0$  band for  $\text{RuCp}_2$  simulated from PBE0 adiabatic energy, geometries and harmonic frequencies. Black vertical line is harmonic vertical energy.

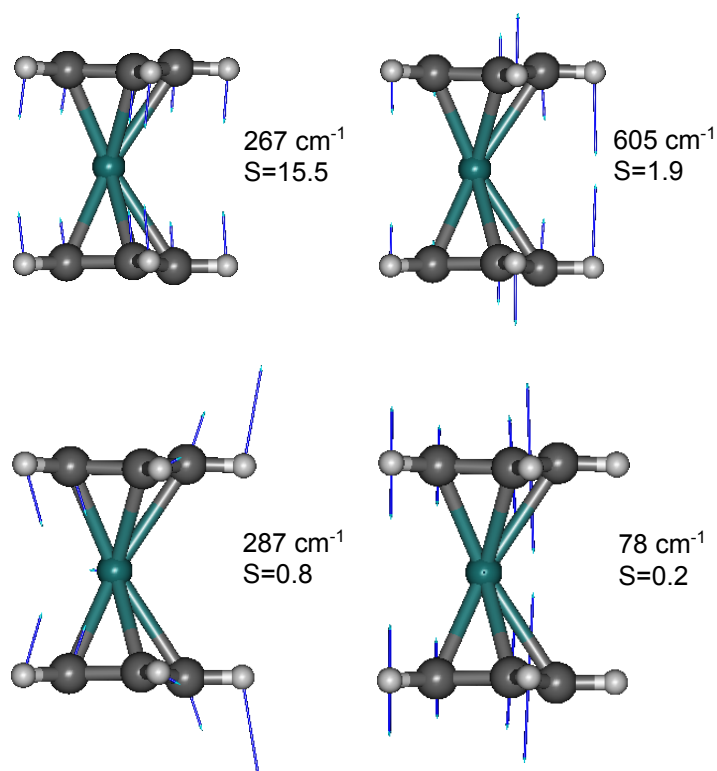

Figure S7. Four vibrational modes of the  $T_1$  state of  $\text{RuCp}_2$  most relevant for vibrational progression in the  $S_0 \rightarrow T_1$  absorption band with indicated values of Huang-Rhys parameter  $S$ . Based on PBE0/def2-TZVP geometries and frequencies. Compare with Figure 6, main article

## 4. Detailed DFT results

Table S23: Non-relativistic and DKH2-relativistic DFT:B3LYP results for [MnCp<sub>2</sub>] doublet-sextet adiabatic energy to determine the relativistic correction.

|                                      | E (S=1/2)<br>(a.u.) | <S <sup>2</sup> ><br>(S=1/2) | E (S=5/2)<br>(a.u.) | <S <sup>2</sup> ><br>(S=5/2)    | ΔE<br>(eV)   |
|--------------------------------------|---------------------|------------------------------|---------------------|---------------------------------|--------------|
| <i>for PBE0/def2-TZVP geometries</i> |                     |                              |                     |                                 |              |
| B3LYP/cc-pVTZ                        | -1538.268456        | 0.759                        | -1538.275473        | 8.755                           | -0.191       |
| B3LYP/cc-pVTZ-DK                     | -1545.959098        | 0.759                        | -1545.962053        | 8.755                           | -0.080       |
|                                      |                     |                              |                     | <i>relativistic correction:</i> | <i>0.111</i> |
| <hr/>                                |                     |                              |                     |                                 |              |
| <i>for BP86/def2-TZVP geometries</i> |                     |                              |                     |                                 |              |
| B3LYP/cc-pVTZ                        | -1538.267054        | 0.760                        | -1538.273156        | 8.760                           | -0.17        |
| B3LYP/cc-pVTZ-DK                     | -1545.957711        | 0.759                        | -1545.959995        | 8.761                           | -0.06        |
|                                      |                     |                              |                     | <i>relativistic correction:</i> | <i>0.104</i> |

Table S24: Non-relativistic and DKH2-relativistic DFT:B3LYP results for [FeCp<sub>2</sub>] singlet-triplet vertical excitation energy to determine the relativistic correction.

|                                    | E (S=0)<br>(a.u.) | E (S=1)<br>(a.u.) | <S <sup>2</sup> ><br>(S=1) | ΔE<br>(eV)                      |              |
|------------------------------------|-------------------|-------------------|----------------------------|---------------------------------|--------------|
| <i>for BP86/def2-TZVP geometry</i> |                   |                   |                            |                                 |              |
| B3LYP/cc-pVTZ                      | -1651.009912      | -1650.946817      | 2.031                      | 1.717                           |              |
| B3LYP/cc-pVTZ-DK                   | -1660.079590      | -1660.015882      | 2.030                      | 1.734                           |              |
|                                    |                   |                   |                            | <i>relativistic correction:</i> | <i>0.017</i> |
| <hr/>                              |                   |                   |                            |                                 |              |
| <i>for PBE0/def2-TZVP geometry</i> |                   |                   |                            |                                 |              |
| B3LYP/cc-pVTZ                      | -1651.011152      | -1650.947683      | 2.029                      | 1.727                           |              |
| B3LYP/cc-pVTZ-DK                   | -1660.081072      | -1660.016999      | 2.029                      | 1.744                           |              |
|                                    |                   |                   |                            | <i>relativistic correction:</i> | <i>0.016</i> |

Table S25: Non-relativistic and DKH2-relativistic DFT:B3LYP results for [CoCp<sub>2</sub>]<sup>+</sup> singlet-triplet vertical excitation energy to determine the relativistic correction.

|                                    | E (S=0)<br>(a.u.) | E (S=1)<br>(a.u.) | <S <sup>2</sup> ><br>(S=1) | ΔE<br>(eV)                      |               |
|------------------------------------|-------------------|-------------------|----------------------------|---------------------------------|---------------|
| <i>for BP86/def2-TZVP geometry</i> |                   |                   |                            |                                 |               |
| B3LYP/cc-pVTZ                      | -1769.862287      | -1769.788324      | 2.058                      | 2.013                           |               |
| B3LYP/cc-pVTZ-DK                   | -1780.494446      | -1780.420675      | 2.057                      | 2.007                           |               |
|                                    |                   |                   |                            | <i>relativistic correction:</i> | <i>-0.005</i> |

Table S26. Detailed DFT results for [MnCp<sub>2</sub>] doublet–sextet adiabatic energy.<sup>a</sup>

| method                               | E (S=1/2)<br>(a.u.) | <S <sup>2</sup> ><br>(S=1/2) | E (S=5/2)<br>(a.u.) | <S <sup>2</sup> ><br>(S=5/2) | ΔE <sub>nrel</sub><br>(eV) | ΔE <sup>b</sup><br>(eV) |
|--------------------------------------|---------------------|------------------------------|---------------------|------------------------------|----------------------------|-------------------------|
| <i>for PBE0/def2-TZVP geometries</i> |                     |                              |                     |                              |                            |                         |
| BP86                                 | -1538.510041        | 0.759                        | -1538.477677        | 8.758                        | 0.88                       | 0.99                    |
| BP86-D3                              | -1538.533370        | 0.759                        | -1538.500020        | 8.758                        | 0.91                       | 1.02                    |
| PBE                                  | -1537.570799        | 0.759                        | -1537.535606        | 8.757                        | 0.96                       | 1.07                    |
| PBE-D3                               | -1537.582484        | 0.759                        | -1537.546736        | 8.757                        | 0.97                       | 1.08                    |
| PBE0                                 | -1537.593204        | 0.761                        | -1537.606981        | 8.757                        | -0.37                      | -0.26                   |
| PBE0-D3                              | -1537.605503        | 0.761                        | -1537.618728        | 8.757                        | -0.36                      | -0.25                   |
| LC-wPBE                              | -1537.826786        | 0.758                        | -1537.820056        | 8.754                        | 0.18                       | 0.29                    |
| LC-wPBE-D3                           | -1537.841583        | 0.758                        | -1537.834254        | 8.754                        | 0.20                       | 0.31                    |
| PW6B95                               | -1539.465512        | 0.758                        | -1539.470311        | 8.755                        | -0.13                      | -0.02                   |
| PW6B95-D3                            | -1539.478809        | 0.758                        | -1539.484073        | 8.755                        | -0.14                      | -0.03                   |
| BLYP                                 | -1538.161059        | 0.758                        | -1538.133708        | 8.755                        | 0.74                       | 0.85                    |
| BLYP-D3                              | -1538.186028        | 0.758                        | -1538.157661        | 8.755                        | 0.77                       | 0.88                    |
| B3LYP                                | -1538.299824        | 0.759                        | -1538.307281        | 8.755                        | -0.20                      | -0.09                   |
| B3LYP-D3                             | -1538.320189        | 0.759                        | -1538.326744        | 8.755                        | -0.18                      | -0.07                   |
| B3LYP*                               | -1537.881393        | 0.759                        | -1537.877528        | 8.755                        | 0.11                       | 0.22                    |
| B3LYP*-D3                            | -1537.901758        | 0.759                        | -1537.896991        | 8.755                        | 0.13                       | 0.24                    |
| B2PLYP                               | -1537.887408        | 0.759                        | -1537.880255        | 8.756                        | 0.19                       | 0.31                    |
| B2PLYP-D3                            | -1537.898443        | 0.759                        | -1537.890877        | 8.756                        | 0.21                       | 0.32                    |
| LC-BLYP                              | -1536.769889        | 0.757                        | -1536.766961        | 8.753                        | 0.08                       | 0.19                    |
| CAM-B3LYP                            | -1538.103575        | 0.758                        | -1538.112827        | 8.755                        | -0.25                      | -0.14                   |
| CAM-B3LYP-D3                         | -1538.117519        | 0.758                        | -1538.126227        | 8.755                        | -0.24                      | -0.13                   |
| B97D                                 | -1538.380754        | 0.771                        | -1538.374986        | 8.755                        | 0.16                       | 0.27                    |
| wB97XD                               | -1538.166347        | 0.757                        | -1538.161845        | 8.754                        | 0.12                       | 0.23                    |
| OLYP                                 | -1538.373474        | 0.765                        | -1538.364982        | 8.756                        | 0.23                       | 0.34                    |
| O3LYP                                | -1538.281514        | 0.765                        | -1538.292209        | 8.756                        | -0.29                      | -0.18                   |
| OPBE                                 | -1538.355468        | 0.767                        | -1538.341262        | 8.761                        | 0.39                       | 0.50                    |

(table continued on next page)

| method                                      | E (S=1/2)<br>(a.u.) | $\langle S^2 \rangle$<br>(S=1/2) | E (S=5/2)<br>(a.u.) | $\langle S^2 \rangle$<br>(S=5/2) | $\Delta E_{\text{nrrel}}$<br>(eV) | $\Delta E^b$<br>(eV) |
|---------------------------------------------|---------------------|----------------------------------|---------------------|----------------------------------|-----------------------------------|----------------------|
| <i>(table continued from previous page)</i> |                     |                                  |                     |                                  |                                   |                      |
| TPSS                                        | -1538.432622        | 0.758                            | -1538.392954        | 8.758                            | 1.08                              | 1.19                 |
| TPSS-D3                                     | -1538.449428        | 0.758                            | -1538.409018        | 8.758                            | 1.10                              | 1.21                 |
| TPSSh                                       | -1538.356491        | 0.759                            | -1538.336673        | 8.757                            | 0.54                              | 0.65                 |
| TPSSh-D3                                    | -1538.372909        | 0.759                            | -1538.352342        | 8.757                            | 0.56                              | 0.67                 |
| BR                                          | -1538.077433        | 0.761                            | -1538.069600        | 8.756                            | 0.21                              | 0.32                 |
| LH14t-calPBE                                | -1536.842609        | 0.761                            | -1536.840549        | 8.756                            | 0.06                              | 0.17                 |
| LH14t-calPBE-D3                             | -1536.855299        | 0.761                            | -1536.852645        | 8.756                            | 0.07                              | 0.18                 |
| M06                                         | -1537.920594        | 0.779                            | -1537.948031        | 8.758                            | -0.75                             | -0.64                |
| M06-D3                                      | -1537.923219        | 0.779                            | -1537.950537        | 8.758                            | -0.74                             | -0.63                |
| M06L                                        | -1538.207134        | 0.767                            | -1538.206323        | 8.763                            | 0.02                              | 0.13                 |
| M06L-D3                                     | -1538.207909        | 0.767                            | -1538.207194        | 8.763                            | 0.02                              | 0.13                 |
| M11                                         | -1537.946865        | 0.758                            | -1537.972577        | 8.754                            | -0.70                             | -0.59                |
| M11L                                        | -1538.419761        | 0.756                            | -1538.366936        | 8.758                            | 1.44                              | 1.55                 |
| MN15                                        | -1538.153247        | 0.770                            | -1538.151534        | 8.757                            | 0.05                              | 0.16                 |
| MN15L                                       | -1538.079609        | 0.803                            | -1538.116468        | 8.764                            | -1.00                             | -0.89                |
| MVS                                         | -5.473700           | 0.780                            | -5.492500           | 8.756                            | -0.51                             | -0.40                |
| MVSh                                        | -6.460300           | 0.774                            | -6.518300           | 8.756                            | -1.58                             | -1.47                |
| SSB-D                                       | -5.111000           | 0.765                            | -5.091200           | 8.756                            | 0.54                              | 0.65                 |
| S12h                                        | -6.057700           | 0.762                            | -6.079200           | 8.756                            | -0.59                             | -0.47                |
| S12g                                        | -5.017300           | 0.763                            | -4.995300           | 8.755                            | 0.60                              | 0.71                 |
| -----                                       |                     |                                  |                     |                                  |                                   |                      |
| <i>for BP86/def2-TZVP geometries</i>        |                     |                                  |                     |                                  |                                   |                      |
| BP86                                        | -1538.511507        | 0.759                            | -1538.479706        | 8.763                            | 0.87                              | 0.97                 |
| PBE0                                        | -1537.591382        | 0.761                            | -1537.604199        | 8.763                            | -0.35                             | -0.24                |

<sup>a</sup> Single-point energy calculations for PBE0/def2-TZVP (default) or BP86/def2TZVP geometries.

<sup>b</sup> Best estimates, including additive relativistic correction from Table S22.

Table S27. Detailed DFT results for [FeCp<sub>2</sub>], S<sub>0</sub> → T<sub>1</sub> vertical excitation energy. <sup>a</sup>

| method                             | E (S=0)<br>(a.u.) | E (S=1)<br>(a.u.) | <S <sup>2</sup> ><br>(S=1) | ΔE <sub>nrel</sub><br>(eV) | ΔE <sup>b</sup><br>(eV) |
|------------------------------------|-------------------|-------------------|----------------------------|----------------------------|-------------------------|
| <i>for BP86/def2-TZVP geometry</i> |                   |                   |                            |                            |                         |
| BP86                               | -1651.290053      | -1651.210963      | 2.027                      | 2.15                       | 2.17                    |
| PBE                                | -1650.327100      | -1650.247877      | 2.027                      | 2.16                       | 2.17                    |
| PBE0                               | -1650.323698      | -1650.266987      | 2.038                      | 1.54                       | 1.56                    |
| LC-wPBE                            | -1650.567226      | -1650.504232      | 2.025                      | 1.71                       | 1.73                    |
| PW6B95                             | -1652.247099      | -1652.188587      | 2.031                      | 1.59                       | 1.61                    |
| BLYP                               | -1650.925320      | -1650.845438      | 2.024                      | 2.17                       | 2.19                    |
| B3LYP                              | -1651.041451      | -1650.978859      | 2.032                      | 1.70                       | 1.72                    |
| B3LYP*                             | -1650.621806      | -1650.554388      | 2.030                      | 1.83                       | 1.85                    |
| B2PLYP                             | -1650.647601      | -1650.561563      | 2.038                      | 2.34                       | 2.36                    |
| LC-BLYP                            | -1649.510813      | -1649.451199      | 2.024                      | 1.62                       | 1.64                    |
| CAM-B3LYP                          | -1650.848808      | -1650.790042      | 2.029                      | 1.60                       | 1.62                    |
| B97D                               | -1651.220285      | -1651.147613      | 2.049                      | 1.98                       | 1.99                    |
| wB97XD                             | -1650.911601      | -1650.850037      | 2.027                      | 1.68                       | 1.69                    |
| OLYP                               | -1651.179841      | -1651.105367      | 2.041                      | 2.03                       | 2.04                    |
| O3LYP                              | -1651.065691      | -1651.000385      | 2.044                      | 1.78                       | 1.79                    |
| OPBE                               | -1651.169768      | -1651.095861      | 2.044                      | 2.01                       | 2.03                    |
| TPSS                               | -1651.188714      | -1651.109312      | 2.025                      | 2.16                       | 2.18                    |
| TPSSh                              | -1651.101858      | -1651.031980      | 2.030                      | 1.90                       | 1.92                    |
| BR                                 | -1650.791400      | -1650.711611      | 2.037                      | 2.17                       | 2.19                    |
| LH14t-calPBE                       | -1649.553700      | -1649.486460      | 2.031                      | 1.83                       | 1.85                    |
| M06                                | -1650.665507      | -1650.611783      | 2.056                      | 1.46                       | 1.48                    |
| M06L                               | -1650.957255      | -1650.890524      | 2.056                      | 1.82                       | 1.83                    |
| M11                                | -1650.654587      | -1650.601894      | 2.024                      | 1.43                       | 1.45                    |
| M11L                               | -1651.176334      | -1651.108629      | 2.015                      | 1.84                       | 1.86                    |
| MN15                               | -1650.939883      | -1650.883035      | 2.018                      | 1.55                       | 1.56                    |
| MN15L                              | -1650.834304      | -1650.772371      | 2.110                      | 1.69                       | 1.70                    |

*(table continued on next page)*



| method                                      | E (S=0)<br>(a.u.) | E (S=1)<br>(a.u.) | $\langle S^2 \rangle$<br>(S=1) | $\Delta E_{\text{nrrel}}$<br>(eV) | $\Delta E^b$<br>(eV) |
|---------------------------------------------|-------------------|-------------------|--------------------------------|-----------------------------------|----------------------|
| <i>(table continued from previous page)</i> |                   |                   |                                |                                   |                      |
| MVS                                         | -5.485300         | -5.422779         | 2.093                          | 1.70                              | 1.72                 |
| MVSh                                        | -6.456500         | -6.412807         | 2.079                          | 1.19                              | 1.21                 |
| SSB-D                                       | -5.124300         | -5.053452         | 2.050                          | 1.93                              | 1.94                 |
| S12h                                        | -6.056400         | -6.001269         | 2.044                          | 1.50                              | 1.52                 |
| S12g                                        | -5.031200         | -4.956427         | 2.042                          | 2.03                              | 2.05                 |
| -----                                       |                   |                   |                                |                                   |                      |
| <i>for PBE0/def2-TZVP geometry</i>          |                   |                   |                                |                                   |                      |
| BP86                                        | -1651.288433      | -1651.210963      | 2.027                          | 2.11                              | 2.12                 |
| PBE0                                        | -1650.325914      | -1650.266987      | 2.038                          | 1.60                              | 1.62                 |

<sup>a</sup>Single-point energy calculations for BP86/def2TZVP (default) or PBE0/def2TZVP geometry of the singlet ground state. <sup>b</sup> Best estimates, including additive relativistic correction from Table S23.

Table S28. Detailed DFT results for  $[\text{CoCp}_2]^+$ ,  $S_0 \rightarrow T_1$  vertical excitation energy. <sup>a</sup>

| method       | E (S=0)<br>(a.u.) | E (S=1)<br>(a.u.) | $\langle S^2 \rangle$<br>(S=1) | $\Delta E_{\text{nrrel}}$<br>(eV) | $\Delta E^b$<br>(eV) |
|--------------|-------------------|-------------------|--------------------------------|-----------------------------------|----------------------|
| BP86         | -1770.157362      | -1770.063977      | 2.025                          | 2.54                              | 2.54                 |
| PBE          | -1769.171686      | -1769.078296      | 2.024                          | 2.54                              | 2.54                 |
| PBE0         | -1769.163012      | -1769.096448      | 2.085                          | 1.81                              | 1.81                 |
| LC-wPBE      | -1769.402546      | -1769.327233      | 2.050                          | 2.05                              | 2.04                 |
| PW6B95       | -1771.137604      | -1771.069712      | 2.078                          | 1.85                              | 1.84                 |
| BLYP         | -1769.790424      | -1769.696359      | 2.023                          | 2.56                              | 2.55                 |
| B3LYP        | -1769.893382      | -1769.819640      | 2.059                          | 2.01                              | 2.00                 |
| B3LYP*       | -1769.467675      | -1769.388250      | 2.045                          | 2.16                              | 2.16                 |
| B2PLYP       | -1769.500224      | -1769.377393      | 2.328                          | 3.34                              | 3.34                 |
| LC-BLYP      | -1768.353173      | -1768.281054      | 2.060                          | 1.96                              | 1.96                 |
| CAM-B3LYP    | -1769.703094      | -1769.633492      | 2.070                          | 1.89                              | 1.89                 |
| B97D         | -1770.163440      | -1770.073643      | 2.039                          | 2.44                              | 2.44                 |
| wB97XD       | -1769.764298      | -1769.692759      | 2.060                          | 1.95                              | 1.94                 |
| OLYP         | -1770.089197      | -1769.999024      | 2.033                          | 2.45                              | 2.45                 |
| O3LYP        | -1769.959224      | -1769.880311      | 2.051                          | 2.15                              | 2.14                 |
| OPBE         | -1770.076448      | -1769.987068      | 2.035                          | 2.43                              | 2.43                 |
| TPSS         | -1770.037972      | -1769.946583      | 2.030                          | 2.49                              | 2.48                 |
| TPSSh        | -1769.948636      | -1769.868054      | 2.049                          | 2.19                              | 2.19                 |
| BR           | -1769.601332      | -1769.507579      | 2.034                          | 2.55                              | 2.55                 |
| LH14t-calPBE | -1768.363494      | -1768.284017      | 2.049                          | 2.16                              | 2.16                 |
| M06          | -1769.512690      | -1769.443018      | 2.067                          | 1.90                              | 1.89                 |
| M06L         | -1769.806053      | -1769.728108      | 2.068                          | 2.12                              | 2.12                 |
| M11          | -1769.470654      | -1769.410777      | 2.090                          | 1.63                              | 1.62                 |
| M11L         | -1770.020879      | -1769.946366      | 2.035                          | 2.03                              | 2.02                 |
| MN15         | -1769.827207      | -1769.754010      | 2.017                          | 1.99                              | 1.99                 |
| MN15L        | -1769.696323      | -1769.617886      | 2.091                          | 2.13                              | 2.13                 |
| MVS          | -5.222617         | -5.145268         | 2.078                          | 2.10                              | 2.10                 |
| MVSh         | -6.176189         | -6.125421         | 2.205                          | 1.38                              | 1.38                 |
| SSB-D        | -4.863020         | -4.779041         | 2.044                          | 2.29                              | 2.28                 |
| S12h         | -5.784259         | -5.720141         | 2.095                          | 1.74                              | 1.74                 |
| S12g         | -4.775035         | -4.686103         | 2.035                          | 2.42                              | 2.41                 |

<sup>a</sup> Single-point energy calculations for BP86/def2-TZVP geometry of the singlet ground state.<sup>b</sup> Best estimates, including additive relativistic correction from Table S24.

Table S29. Detailed DFT results for [RuCp<sub>2</sub>], S<sub>0</sub> → T<sub>1</sub> vertical excitation energy. <sup>a</sup>

| method                                      | E (S=0) (a.u.) | E (S=1) (a.u.) | <S <sup>2</sup> > (S=1) | ΔE(eV) |
|---------------------------------------------|----------------|----------------|-------------------------|--------|
| <i>for BP86/def2-TZVP geometry</i>          |                |                |                         |        |
| BP86                                        | -482.364909    | -482.239488    | 2.009                   | 3.41   |
| PBE                                         | -481.756438    | -481.630970    | 2.009                   | 3.41   |
| PBE0                                        | -481.748926    | -481.628289    | 2.013                   | 3.28   |
| LC-wPBE                                     | -481.965017    | -481.845915    | 2.011                   | 3.24   |
| PW6B95                                      | -482.783818    | -482.661033    | 2.010                   | 3.34   |
| BLYP                                        | -482.000446    | -481.875459    | 2.008                   | 3.40   |
| B3LYP                                       | -482.238070    | -482.116269    | 2.011                   | 3.31   |
| B3LYP*                                      | -481.956779    | -481.833717    | 2.010                   | 3.35   |
| B2PLYP                                      | -481.903844    | -481.772301    | 2.019                   | 3.58   |
| LC-BLYP                                     | -480.821376    | -480.703178    | 2.011                   | 3.22   |
| CAM-B3LYP                                   | -481.931925    | -481.811799    | 2.011                   | 3.27   |
| B97D                                        | -482.134380    | -482.011456    | 2.013                   | 3.34   |
| wB97XD                                      | -482.111676    | -481.989106    | 2.011                   | 3.34   |
| OLYP                                        | -482.188485    | -482.064966    | 2.010                   | 3.36   |
| O3LYP                                       | -482.191179    | -482.069372    | 2.011                   | 3.31   |
| OPBE                                        | -482.313493    | -482.189074    | 2.011                   | 3.39   |
| TPSS                                        | -482.298324    | -482.169571    | 2.010                   | 3.50   |
| TPSSh                                       | -482.242406    | -482.116227    | 2.011                   | 3.43   |
| BR                                          | -482.140249    | -482.011910    | 2.011                   | 3.49   |
| LH14t-calPBE                                | -481.454845    | -481.338042    | 2.010                   | 3.18   |
| M06                                         | -481.911682    | -481.792444    | 2.013                   | 3.24   |
| M06L                                        | -482.239698    | -482.115108    | 2.016                   | 3.39   |
| M11                                         | -481.859801    | -481.740235    | 2.010                   | 3.25   |
| M11L                                        | -482.388713    | -482.277358    | 2.021                   | 3.03   |
| MN15                                        | -481.799540    | -481.675348    | 2.006                   | 3.38   |
| MN15L                                       | -481.720362    | -481.595437    | 2.022                   | 3.40   |
| MVS                                         | -5.467267      | -5.350355      | 2.023                   | 3.18   |
| MVSh                                        | -6.392441      | -6.279717      | 2.024                   | 3.07   |
| SSB-D                                       | -5.100782      | -4.982225      | 2.012                   | 3.23   |
| S12h                                        | -5.989855      | -5.872781      | 2.014                   | 3.19   |
| S12g                                        | -5.007957      | -4.887381      | 2.011                   | 3.28   |
| <hr style="border-top: 1px dashed black;"/> |                |                |                         |        |
| <i>for PBE0/def2-TZVP geometry</i>          |                |                |                         |        |
| BP86                                        | -482.364909    | -482.232830    | 2.008                   | 3.59   |
| PBE0                                        | -481.751265    | -481.625058    | 2.012                   | 3.43   |

<sup>a</sup> Single-point energy calculations for BP86/def2TZVP (default) or PBE0/def2TZVP geometry of the singlet ground state.

Table S30. Detailed DFT results for [RuCp<sub>2</sub>] S<sub>0</sub> – T<sub>1</sub> adiabatic energy. <sup>a</sup>

| method                               | E (S=0) (a.u.) | E (S=1) (a.u.) | <S <sup>2</sup> > (S=1) | ΔE (eV) |
|--------------------------------------|----------------|----------------|-------------------------|---------|
| <i>for PBE0/def2-TZVP geometries</i> |                |                |                         |         |
| BP86                                 | -482.364909    | -482.263517    | 2.011                   | 2.76    |
| PBE0                                 | -481.751265    | -481.653292    | 2.019                   | 2.67    |
| <i>for BP86/def2-TZVP geometries</i> |                |                |                         |         |
| BP86                                 | -482.364909    | -482.267604    | 2.011                   | 2.65    |
| BP86-D3                              | -482.382585    | -482.285080    | 2.011                   | 2.65    |
| PBE                                  | -481.756438    | -481.656761    | 2.011                   | 2.71    |
| PBE-D3                               | -481.765677    | -481.665873    | 2.011                   | 2.72    |
| PBE0                                 | -481.748926    | -481.650713    | 2.020                   | 2.67    |
| PBE0-D3                              | -481.758421    | -481.660115    | 2.020                   | 2.68    |
| LC-wPBE                              | -481.965017    | -481.863510    | 2.021                   | 2.76    |
| LC-wPBE-D3                           | -481.976126    | -481.874540    | 2.021                   | 2.76    |
| PW6B95                               | -482.783818    | -482.684093    | 2.015                   | 2.71    |
| PW6B95-D3                            | -482.798611    | -482.698559    | 2.015                   | 2.72    |
| BLYP                                 | -482.000446    | -481.910831    | 2.010                   | 2.44    |
| BLYP-D3                              | -482.019331    | -481.929492    | 2.010                   | 2.44    |
| B3LYP                                | -482.238070    | -482.147367    | 2.016                   | 2.47    |
| B3LYP-D3                             | -482.253370    | -482.162554    | 2.016                   | 2.47    |
| B3LYP*                               | -481.956779    | -481.864251    | 2.014                   | 2.52    |
| B3LYP*-D3                            | -481.972079    | -481.879438    | 2.014                   | 2.52    |
| B2PLYP                               | -481.903844    | -481.797686    | 2.034                   | 2.89    |
| B2PLYP-D3                            | -481.911977    | -481.805777    | 2.034                   | 2.89    |
| LC-BLYP                              | -480.821376    | -480.722098    | 2.021                   | 2.70    |
| CAM-B3LYP                            | -481.931925    | -481.838355    | 2.018                   | 2.55    |
| CAM-B3LYP-D3                         | -481.942379    | -481.848735    | 2.018                   | 2.55    |
| B97D                                 | -482.134380    | -482.039705    | 2.016                   | 2.58    |
| wB97XD                               | -482.111676    | -482.011690    | 2.018                   | 2.72    |
| OLYP                                 | -482.188485    | -482.089678    | 2.013                   | 2.69    |
| O3LYP                                | -482.191179    | -482.093131    | 2.016                   | 2.67    |
| OPBE                                 | -482.313493    | -482.204894    | 2.014                   | 2.96    |
| TPSS                                 | -482.298324    | -482.196774    | 2.013                   | 2.76    |
| TPSS-D3                              | -482.311318    | -482.209596    | 2.013                   | 2.77    |
| TPSSh                                | -482.242406    | -482.141535    | 2.016                   | 2.74    |
| TPSSh-D3                             | -482.254998    | -482.153998    | 2.016                   | 2.75    |

(table continued on next page)

| method                                      | E (S=0) (a.u.) | E (S=1) (a.u.) | <S <sup>2</sup> > (S=1) | ΔE (eV) |
|---------------------------------------------|----------------|----------------|-------------------------|---------|
| <i>(table continued from previous page)</i> |                |                |                         |         |
| BR                                          | -482.140249    | -482.049275    | 2.013                   | 2.48    |
| LH14t-calPBE                                | -481.454845    | -481.351971    | 2.014                   | 2.80    |
| LH14t-calPBE-D3                             | -481.464831    | -481.361820    | 2.014                   | 2.80    |
| M06                                         | -481.911682    | -481.817805    | 2.020                   | 2.55    |
| M06-D3                                      | -481.914201    | -481.820254    | 2.020                   | 2.56    |
| M06L                                        | -482.239698    | -482.137524    | 2.022                   | 2.78    |
| M06L-D3                                     | -482.240496    | -482.138320    | 2.022                   | 2.78    |
| M11                                         | -481.859801    | -481.765228    | 2.015                   | 2.57    |
| M11L                                        | -482.388713    | -482.299598    | 2.026                   | 2.42    |
| MN15                                        | -481.799540    | -481.698239    | 2.010                   | 2.76    |
| MN15L                                       | -481.720362    | -481.619481    | 2.028                   | 2.75    |
| MVS                                         | -5.467267      | -5.370290      | 2.028                   | 2.64    |
| MVSh                                        | -6.392441      | -6.299210      | 2.036                   | 2.54    |
| SSB-D                                       | -5.100782      | -4.997950      | 2.016                   | 2.80    |
| S12h                                        | -5.989855      | -5.895663      | 2.021                   | 2.56    |
| S12g                                        | -5.007957      | -4.908796      | 2.013                   | 2.70    |

<sup>a</sup> Single-point energy calculations for BP86/def2TZVP (default) or PBE0/def2TZVP geometries.

Table S31. Detailed DFT results for [RuCp<sub>2</sub>], T<sub>1</sub> → S<sub>0</sub> vertical emission energy.<sup>a</sup>

| method                                   | E (S=0) (a.u.)   | E (S=1) (a.u.) | <S <sup>2</sup> > (S=1) | ΔE (eV) |
|------------------------------------------|------------------|----------------|-------------------------|---------|
| <i>for BP86/def2-TZVP geometry</i>       |                  |                |                         |         |
| BP86                                     | -482.31211408466 | -482.267604    | 2.011                   | 1.21    |
| PBE0                                     | -481.68953084271 | -481.650713    | 2.020                   | 1.06    |
| <i>for PBE0/def2-TZVP geometry</i>       |                  |                |                         |         |
| BP86                                     | -482.33643126559 | -482.263517    | 2.011                   | 1.98    |
| PBE0                                     | -481.71763022531 | -481.653292    | 2.019                   | 1.75    |
| <i>for UHF-CCSD(T)/cT(D)-PP geometry</i> |                  |                |                         |         |
| BP86                                     | -482.339565      | -482.264199    | 2.012                   | 2.05    |
| PBE                                      | -481.728846      | -481.653044    | 2.011                   | 2.06    |
| PBE0                                     | -481.718844      | -481.652479    | 2.020                   | 1.81    |
| LC-wPBE                                  | -481.929687      | -481.866894    | 2.021                   | 1.71    |
| PW6B95                                   | -482.756239      | -482.686756    | 2.015                   | 1.89    |
| BLYP                                     | -481.985113      | -481.908647    | 2.010                   | 2.08    |
| B3LYP                                    | -482.219070      | -482.149665    | 2.016                   | 1.89    |
| B3LYP*                                   | -481.936848      | -481.865202    | 2.014                   | 1.95    |
| B2PLYP                                   | -481.876114      | -481.798699    | 2.033                   | 2.11    |
| LC-BLYP                                  | -480.790348      | -480.727675    | 2.021                   | 1.71    |
| CAM-B3LYP                                | -481.908287      | -481.842558    | 2.018                   | 1.79    |
| B97D                                     | -482.109870      | -482.036175    | 2.016                   | 2.01    |
| wB97XD                                   | -482.083257      | -482.014027    | 2.018                   | 1.88    |
| OLYP                                     | -482.159902      | -482.086787    | 2.014                   | 1.99    |
| O3LYP                                    | -482.162547      | -482.092783    | 2.016                   | 1.90    |
| OPBE                                     | -482.272875      | -482.200890    | 2.015                   | 1.96    |
| TPSS                                     | -482.270578      | -482.195750    | 2.014                   | 2.04    |
| TPSSh                                    | -482.213608      | -482.142580    | 2.017                   | 1.93    |
| BR                                       | -482.125751      | -482.047260    | 2.013                   | 2.14    |
| LH14t-calPBE                             | -481.425086      | -481.352421    | 2.015                   | 1.98    |
| M06                                      | -481.887905      | -481.816688    | 2.018                   | 1.94    |
| M06L                                     | -482.207418      | -482.138136    | 2.026                   | 1.89    |
| M11                                      | -481.834446      | -481.769452    | 2.014                   | 1.77    |
| M11L                                     | -482.362877      | -482.302039    | 2.026                   | 1.66    |
| MN15                                     | -481.770884      | -481.697155    | 2.010                   | 2.01    |
| MN15L                                    | -481.686127      | -481.616599    | 2.031                   | 1.89    |
| MVS                                      | -5.433496        | -5.368752      | 2.030                   | 1.76    |
| MVSh                                     | -6.359103        | -6.302083      | 2.037                   | 1.55    |
| SSB-D                                    | -5.064722        | -4.995379      | 2.016                   | 1.89    |
| S12h                                     | -5.961737        | -5.898170      | 2.021                   | 1.73    |
| S12g                                     | -4.977739        | -4.905795      | 2.014                   | 1.96    |

<sup>a</sup> Single-point calculations for BP86/def2TZVP, PBE0/def2TZVP or UHF-CCSD(T)/cT(D)-PP (default) geometry of T<sub>1</sub> excited state

Table S32. Cross-check of selected DFT results from different programs: [MnCp<sub>2</sub>], doublet–sextet adiabatic energy (using PBE0/def2-TZVP geometries).

| method | basis set     | program    | S=1/2        | S=5/2        | ΔE (eV) |
|--------|---------------|------------|--------------|--------------|---------|
| PBE    | ET-pVQZ(TZ2P) | ADF2017    | -4.95469787  | -4.92039338  | 0.93    |
|        | def2-QZ(T)VPP | Turbomole7 | -1537.570799 | -1537.535606 | 0.96    |
| PBE0   | ET-pVQZ(TZ2P) | ADF2017    | -6.07556432  | -6.09059086  | -0.41   |
|        | def2-QZ(T)VPP | G16        | -1537.593204 | -1537.606981 | -0.37   |
|        | def2-QZ(T)VPP | Turbomole7 | -1537.593204 | -1537.606981 | -0.37   |
| M06    | ET-pVQZ(TZ2P) | ADF2017    | -5.89309694  | -5.91904658  | -0.71   |
|        | def2-QZ(T)VPP | G16        | -1537.920594 | -1537.948031 | -0.75   |

Table S33. Cross-check of selected DFT results from different programs: [FeCp<sub>2</sub>], singlet–triplet vertical excitation energy (using BP86/def2-TZVP geometry of singlet).

| method | basis set     | program   | S=0          | S=1          | ΔE (eV) |
|--------|---------------|-----------|--------------|--------------|---------|
| PBE    | ET-pVQZ(TZ2P) | ADF2017   | -4.96794343  | -4.88821933  | 2.17    |
|        | def2-QZ(T)VPP | Turbomole | -1650.327100 | -1650.247877 | 2.16    |
| PBE0   | ET-pVQZ(TZ2P) | ADF2017   | -6.07401023  | -6.01692879  | 1.55    |
|        | def2-QZ(T)VPP | Turbomole | -1650.323698 | -1650.266987 | 1.54    |
| M06    | ET-pVQZ(TZ2P) | ADF2017   | -5.90181502  | -5.84757295  | 1.48    |
|        | def2-QZ(T)VPP | G16       | -1650.665507 | -1650.611783 | 1.46    |

Table S34. Cross-check of selected DFT results from different programs:[CoCp<sub>2</sub>]<sup>+</sup>, singlet–triplet vertical excitation energy (using BP86/def2-TZVP geometry of singlet).

| method | basis set     | program    | S=0          | S=1          | ΔE (eV) |
|--------|---------------|------------|--------------|--------------|---------|
| PBE    | ET-pVQZ(TZ2P) | ADF2017    | -4.71268819  | -4.61932038  | 2.54    |
|        | def2-QZ(T)VPP | Turbomole7 | -1769.171686 | -1769.078296 | 2.54    |
| PBE0   | ET-pVQZ(TZ2P) | ADF2017    | -5.80115795  | -5.73480554  | 1.81    |
|        | def2-QZ(T)VPP | Turbomole  | -1769.163012 | -1769.096448 | 1.81    |
| M06    | ET-pVQZ(TZ2P) | ADF2017    | -5.63388678  | -5.56437829  | 1.89    |
|        | def2-QZ(T)VPP | G16        | -1769.512690 | -1769.443018 | 1.90    |

Table S35. Cross-check of selected DFT results from different programs: [RuCp<sub>2</sub>], singlet–triplet adiabatic energy (using BP86/def2-TZVP geometries).

| method | basis set       | program    | S=0         | S=1         | ΔE (eV) |
|--------|-----------------|------------|-------------|-------------|---------|
| PBE    | ZORA/QZ4P(TZ2P) | ADF2017    | -4.95148669 | -4.85382699 | 2.66    |
|        | def2-QZ(T)VPP   | Turbomole7 | -481.756438 | -481.656761 | 2.71    |
| PBE0   | ZORA/QZ4P(TZ2P) | ADF2017    | -6.01292217 | -5.91682351 | 2.61    |
|        | def2-QZ(T)VPP   | Turbomole7 | -481.748926 | -481.650713 | 2.67    |
| M06    | ZORA/QZ4P(TZ2P) | ADF2017    | -5.84202873 | -5.74980101 | 2.51    |
|        | def2-QZ(T)VPP   | G16        | -481.911682 | -481.817805 | 2.55    |

Table S36. Cross-check of selected DFT results from different programs: [RuCp<sub>2</sub>], singlet–triplet vertical excitation energy (using BP86/def2-TZVP geometry of singlet).

| method | basis set       | program    | S=0         | S=1         | ΔE (eV) |
|--------|-----------------|------------|-------------|-------------|---------|
| PBE    | ZORA/QZ4P(TZ2P) | ADF2017    | -4.95148669 | -4.82653980 | 3.40    |
|        | def2-QZ(T)VPP   | Turbomole7 | -481.756438 | -481.630970 | 3.41    |
| PBE0   | ZORA/QZ4P(TZ2P) | ADF2017    | -6.01292217 | -5.89317248 | 3.26    |
|        | def2-QZ(T)VPP   | Turbomole7 | -481.748926 | -481.628289 | 3.28    |
| M06    | ZORA/QZ4P(TZ2P) | ADF2017    | -5.84202873 | -5.72372797 | 3.22    |
|        | def2-QZ(T)VPP   | G16        | -481.911682 | -481.792444 | 3.24    |



Table S37. Estimate of solvation effects on DFT adiabatic energy (doublet - sextet) for MnCp<sub>2</sub>.

|                        | Total energies (a.u.) <sup>a</sup>      |              | ΔE<br>(eV)    |
|------------------------|-----------------------------------------|--------------|---------------|
|                        | S=1/2                                   | S=5/2        |               |
| gas/gas <sup>b</sup>   | -1537.546287                            | -1537.560639 | <b>-0.391</b> |
| solv/gas <sup>c</sup>  | -1537.549697                            | -1537.564256 | -0.396        |
| gas/solv <sup>d</sup>  | -1537.549561                            | -1537.564274 | -0.400        |
| solv/solv <sup>e</sup> | -1537.546144                            | -1537.560623 | <b>-0.394</b> |
|                        | estimated solvation effect <sup>f</sup> |              | -0.003        |

<sup>a</sup> PBE0/def2-TZVP total energies calculated either in gas phase or within the COSMO model (toluene,  $\epsilon=2.4$ ). <sup>b</sup> Energy calculations in gas phase for geometry optimized in gas phase; <sup>c</sup> Energy calculations in solvent for geometry optimized in gas phase; <sup>d</sup> Energy calculations in gas phase for geometry optimized in solvent. <sup>e</sup> Energy calculations in solvent for geometry optimized in solvent. <sup>f</sup> Difference between ΔE values for solvated (solv/solv) and unsolvated (gas/gas) model, the values subtracted are boldfaced.

## 5. Detailed coupled cluster results

Table S38. Detailed coupled cluster results for [MnCp<sub>2</sub>] doublet–sextet adiabatic energy. <sup>a</sup>

| basis set                                   | theory level         | E (S=1/2)<br>(a.u.) | E (S=5/2)<br>(a.u.) | ΔE<br>(eV) |
|---------------------------------------------|----------------------|---------------------|---------------------|------------|
| <i>for PBE0/def2-TZVP geometries:</i>       |                      |                     |                     |            |
| cT(D)-DK                                    | ROHF                 | -1541.952163        | -1542.120173        | -4.57      |
|                                             | RCCSD                | -1544.281133        | -1544.312201        | -0.85      |
|                                             | UCCSD                | -1544.281956        | -1544.313464        | -0.86      |
|                                             | RCCSD(T)             | -1544.416091        | -1544.419971        | -0.11      |
|                                             | UCCSD(T)             | -1544.416884        | -1544.421220        | -0.12      |
|                                             | UCCSD(T) frozen 3s3p | -1543.995425        | -1544.009674        | -0.39      |
|                                             | KS-RCCSD             | -1544.251345        | -1544.292350        | -1.12      |
|                                             | KS-UCCSD             | -1544.252001        | -1544.293866        | -1.14      |
|                                             | KS-RCCSD(T)          | -1544.410268        | -1544.410133        | 0.00       |
|                                             | KS-UCCSD(T)          | -1544.410725        | -1544.411188        | -0.01      |
| cT(D)-NR                                    | ROHF                 | -1534.296958        | -1534.470208        | -4.71      |
|                                             | RCCSD                | -1536.624580        | -1536.660399        | -0.97      |
|                                             | UCCSD                | -1536.625412        | -1536.661666        | -0.99      |
|                                             | RCCSD(T)             | -1536.759393        | -1536.767880        | -0.23      |
|                                             | UCCSD(T)             | -1536.760195        | -1536.769137        | -0.24      |
|                                             | KS-RCCSD(T)          | -1536.753694        | -1536.758164        | -0.12      |
|                                             | KS-UCCSD(T)          | -1536.754159        | -1536.759231        | -0.14      |
|                                             | RCCSD(T*)-F12a       | -1537.004918        | -1537.003089        | 0.05       |
|                                             | UCCSD(T*)-F12a       | -1537.005716        | -1537.004368        | 0.04       |
|                                             | KS-RCCSD(T*)-F12a    | -1536.995400        | -1536.989726        | 0.15       |
| KS-UCCSD(T*)-F12a                           | -1536.995848         | -1536.990710        | 0.14                |            |
| <hr style="border-top: 1px dashed black;"/> |                      |                     |                     |            |
| <i>for BP86/def2-TZVP geometries:</i>       |                      |                     |                     |            |
| cT(D)-DK                                    | UCCSD(T)             | -1544.417464        | -1544.420044        | -0.07      |
| cT(D)-NR                                    | UCCSD(T)             | -1536.760773        | -1536.767682        | -0.19      |
|                                             | UCCSD(T*)-F12a       | -1537.005499        | -1537.002502        | 0.08       |

<sup>a</sup> Single point calculations for PBE0/def2-TZVP (default) or BP86/def2-TZVP geometries.

Table S39. Detailed coupled cluster results for [FeCp<sub>2</sub>], S<sub>0</sub> → T<sub>1</sub> vertical excitation energy. <sup>a</sup>

| basis set                           | theory level                        | E (S=0)<br>(a.u.) | E (S=1)<br>(a.u.) | ΔE<br>(eV) |
|-------------------------------------|-------------------------------------|-------------------|-------------------|------------|
| <i>for BP86/def2-TZVP geometry:</i> |                                     |                   |                   |            |
| cT(D)-DK                            | RHF/ROHF                            | -1655.929466      | -1655.920218      | 0.25       |
|                                     | RCCSD                               | -1658.378913      | -1658.312237      | 1.81       |
|                                     | UCCSD                               | -1658.378913      | -1658.315383      | 1.73       |
|                                     | RCCSD(T)                            | -1658.527123      | -1658.447800      | 2.16       |
|                                     | UCCSD(T)                            | -1658.527123      | -1658.450771      | 2.08       |
|                                     | UCCSD(T) Frozen 3s3p                | -1658.099281      | -1658.023483      | 2.06       |
|                                     | KS-RCCSD                            | -1658.341715      | -1658.283818      | 1.58       |
|                                     | KS-UCCSD                            | -1658.341715      | -1658.286078      | 1.51       |
|                                     | KS-RCCSD(T)                         | -1658.517558      | -1658.443880      | 2.00       |
|                                     | KS-UCCSD(T)                         | -1658.517558      | -1658.445219      | 1.97       |
| cT(D)-NR                            | RHF/ROHF                            | -1646.898635      | -1646.890496      | 0.22       |
|                                     | RCCSD                               | -1649.346594      | -1649.280627      | 1.80       |
|                                     | UCCSD                               | -1649.346594      | -1649.283791      | 1.71       |
|                                     | RCCSD(T)                            | -1649.494659      | -1649.415923      | 2.14       |
|                                     | UCCSD(T)                            | -1649.494659      | -1649.418907      | 2.06       |
|                                     | KS-RCCSD(T)                         | -1649.485136      | -1649.412070      | 1.99       |
|                                     | KS-UCCSD(T)                         | -1649.485136      | -1649.413420      | 1.95       |
|                                     | RCCSD(T*)-F12a                      | -1649.752709      | -1649.671066      | 2.22       |
|                                     | UCCSD(T*)-F12a                      | -1649.752709      | -1649.674065      | 2.14       |
|                                     | KS-RCCSD(T*)-F12a                   | -1649.739471      | -1649.663928      | 2.06       |
|                                     | KS-UCCSD(T*)-F12a                   | -1649.739471      | -1649.665126      | 2.02       |
|                                     | <i>for PBE0/def2-TZVP geometry:</i> |                   |                   |            |
| cT(D)-DK                            | UCCSD(T)                            | -1658.526375      | -1658.449955      | 2.08       |
| cT(D)-NR                            | UCCSD(T)                            | -1649.493842      | -1649.418017      | 2.06       |
|                                     | UCCSD(T*)-F12a                      | -1649.752770      | -1649.674050      | 2.14       |

<sup>a</sup> Single point calculations for BP86/def2-TZVP (default) or PBE0/def2-TZVP geometry of the singlet ground state.

Table S40. Detailed coupled cluster results for  $[\text{CoCp}_2]^+$ ,  $S_0 \rightarrow T_1$  vertical excitation energy. <sup>a</sup>

| basis set         | theory level         | E (S=0)<br>(a.u.) | E (S=1)<br>(a.u.) | $\Delta E$<br>(eV) |
|-------------------|----------------------|-------------------|-------------------|--------------------|
| cT(D)-DK          | RHF/ROHF             | -1776.267725      | -1776.253807      | 0.38               |
|                   | RCCSD                | -1778.764657      | -1778.688158      | 2.08               |
|                   | UCCSD                | -1778.764657      | -1778.692682      | 1.96               |
|                   | RCCSD(T)             | -1778.915315      | -1778.826790      | 2.41               |
|                   | UCCSD(T)             | -1778.915315      | -1778.830249      | 2.31               |
|                   | UCCSD(T) Frozen 3s3p | -1778.484817      | -1778.400683      | 2.29               |
|                   | KS-RCCSD             | -1778.729395      | -1778.661983      | 1.83               |
|                   | KS-UCCSD             | -1778.729395      | -1778.665024      | 1.75               |
|                   | KS-RCCSD(T)          | -1778.906300      | -1778.822767      | 2.27               |
|                   | KS-UCCSD(T)          | -1778.906300      | -1778.824249      | 2.23               |
|                   | cT(D)-NR             | RHF/ROHF          | -1765.676477      | -1765.662886       |
| RCCSD             |                      | -1768.173121      | -1768.096430      | 2.09               |
| UCCSD             |                      | -1768.173121      | -1768.101067      | 1.96               |
| RCCSD(T)          |                      | -1768.323867      | -1768.234982      | 2.42               |
| UCCSD(T)          |                      | -1768.323867      | -1768.238540      | 2.32               |
| KS-RCCSD(T)       |                      | -1768.315084      | -1768.231350      | 2.28               |
| KS-UCCSD(T)       |                      | -1768.315084      | -1768.232843      | 2.24               |
| RCCSD(T*)-F12a    |                      | -1768.588650      | -1768.496662      | 2.50               |
| UCCSD(T*)-F12a    |                      | -1768.588650      | -1768.500094      | 2.41               |
| KS-RCCSD(T*)-F12a |                      | -1768.576853      | -1768.490041      | 2.36               |
| KS-UCCSD(T*)-F12a |                      | -1768.576853      | -1768.491318      | 2.33               |

<sup>a</sup> Single point calculations for BP86/def2-TZVP geometry of the singlet ground state.

Table S41. Detailed coupled cluster results for RuCp<sub>2</sub>, S<sub>0</sub> - T<sub>1</sub> adiabatic energy. <sup>a</sup>

| basis set                                   | theory level         | E (S=0)<br>(a.u.) | E (S=1)<br>(a.u.) | ΔE<br>(eV) |
|---------------------------------------------|----------------------|-------------------|-------------------|------------|
| <i>for BP86/def2-TZVP geometries:</i>       |                      |                   |                   |            |
| cT(D)-PP                                    | RHF/ROHF             | -478.421507       | -478.358552       | 1.71       |
|                                             | RCCSD                | -480.762873       | -480.663789       | 2.70       |
|                                             | UCCSD                | -480.762873       | -480.666438       | 2.62       |
|                                             | RCCSD(T)             | -480.902896       | -480.797655       | 2.86       |
|                                             | UCCSD(T)             | -480.902896       | -480.800098       | 2.80       |
|                                             | UCCSD(T) Frozen 4s4p | -480.515076       | -480.412092       | 2.80       |
|                                             | KS-RCCSD(T)          | -480.895357       | -480.794783       | 2.74       |
|                                             | KS-UCCSD(T)          | -480.895357       | -480.795715       | 2.71       |
|                                             | RCCSD(T*)-F12a       | -481.174697       | -481.066179       | 2.95       |
|                                             | UCCSD(T*)-F12a       | -481.174697       | -481.068698       | 2.88       |
|                                             | KS-RCCSD(T*)-F12a    | -481.163824       | -481.060519       | 2.81       |
|                                             | KS-UCCSD(T*)-F12a    | -481.163824       | -481.061360       | 2.79       |
| <hr style="border-top: 1px dashed black;"/> |                      |                   |                   |            |
| <i>for PBE0/def2-TZVP geometries:</i>       |                      |                   |                   |            |
| cT(D)-PP                                    | UCCSD(T)             | -480.902526       | -480.800439       | 2.78       |
|                                             | UCCSD(T*)-F12a       | -481.175302       | -481.069244       | 2.89       |

<sup>a</sup> Single-point calculations for BP86/def2TZVP (default) or PBE0/def2-TZVP geometries.

Table S42. Detailed coupled cluster results for RuCp<sub>2</sub>, S<sub>0</sub> → T<sub>1</sub> vertical excitation energy. <sup>a</sup>

| basis set                           | theory level         | E (S=0)<br>(a.u.) | E (S=1)<br>(a.u.) | ΔE<br>(eV) |
|-------------------------------------|----------------------|-------------------|-------------------|------------|
| <i>for BP86/def2-TZVP geometry:</i> |                      |                   |                   |            |
| cT(D)-PP                            | RHF/ROHF             | -478.421507       | -478.319711       | 2.77       |
|                                     | RCCSD                | -480.762873       | -480.639089       | 3.37       |
|                                     | UCCSD                | -480.762873       | -480.641063       | 3.31       |
|                                     | RCCSD(T)             | -480.902896       | -480.773593       | 3.52       |
|                                     | UCCSD(T)             | -480.902896       | -480.775252       | 3.47       |
|                                     | UCCSD(T) Frozen 4s4p | -480.515076       | -480.386702       | 3.49       |
|                                     | KS-RCCSD(T)          | -480.895357       | -480.769837       | 3.42       |
|                                     | KS-UCCSD(T)          | -480.895357       | -480.770518       | 3.40       |
|                                     | RCCSD(T*)-F12a       | -481.174697       | -481.043682       | 3.57       |
|                                     | UCCSD(T*)-F12a       | -481.174697       | -481.045401       | 3.52       |
|                                     | KS-RCCSD(T*)-F12a    | -481.163824       | -481.036975       | 3.45       |
|                                     | KS-UCCSD(T*)-F12a    | -481.163824       | -481.037522       | 3.44       |
| <hr/>                               |                      |                   |                   |            |
| <i>for PBE0/def2-TZVP geometry:</i> |                      |                   |                   |            |
| cT(D)-PP                            | UCCSD(T)             | -480.902526       | -480.769053       | 3.63       |
|                                     | UCCSD(T*)-F12a       | -481.175302       | -481.040244       | 3.68       |

<sup>a</sup> Single-point calculations for BP86/def2TZVP (default) or PBE0/def2-TZVP geometry of the singlet ground state.

Table S43. Detailed Results of CC calculations for RuCp<sub>2</sub>, T<sub>1</sub> → S<sub>0</sub> vertical emission energy. <sup>a</sup>

| basis set                                 | theory level         | E (S=0)<br>(a.u.) | E (S=1)<br>(a.u.) | ΔE<br>(eV) |
|-------------------------------------------|----------------------|-------------------|-------------------|------------|
| <i>for PBE0/def2-TZVP geometry:</i>       |                      |                   |                   |            |
| cT(D)-PP                                  | UCCSD(T)             | -480.871577       | -480.800439       | 1.94       |
|                                           | UCCSD(T*)-F12a       | -481.142646       | -481.069244       | 2.00       |
| <i>for BP86/def2-TZVP geometry:</i>       |                      |                   |                   |            |
| cT(D)-PP                                  | UCCSD(T)             | -480.847008       | -480.800098       | 1.28       |
|                                           | UCCSD(T*)-F12a       | -481.117551       | -481.068698       | 1.33       |
| <i>for UHF-CCSD(T)/cT(D)-PP geometry:</i> |                      |                   |                   |            |
| cT(D)-PP                                  | RHF/ROHF             | -478.416745       | -478.371997       | 1.22       |
|                                           | RCCSD                | -480.736315       | -480.668191       | 1.85       |
|                                           | UCCSD                | -480.736315       | -480.669942       | 1.81       |
|                                           | RCCSD(T)             | -480.874270       | -480.799624       | 2.03       |
|                                           | UCCSD(T)             | -480.874270       | -480.801138       | 1.99       |
|                                           | UCCSD(T) Frozen 4s4p | -480.486485       | -480.413205       | 1.99       |
|                                           | KS-RCCSD(T)          | -480.867009       | -480.794935       | 1.96       |
|                                           | KS-UCCSD(T)          | -480.867009       | -480.795846       | 1.94       |
|                                           | RCCSD(T*)-F12a       | -481.144831       | -481.067908       | 2.09       |
|                                           | UCCSD(T*)-F12a       | -481.144831       | -481.069417       | 2.05       |
|                                           | KS-RCCSD(T*)-F12a    | -481.134396       | -481.060209       | 2.02       |
|                                           | KS-UCCSD(T*)-F12a    | -481.134396       | -481.061042       | 2.00       |

<sup>a</sup> Single-point calculations for PBE0/def2-TZVP, BP86/def2TZVP or UHF-CCSD(T)/cT(D)-PP (default) geometry of the triplet excited state.

## 6. Active orbitals

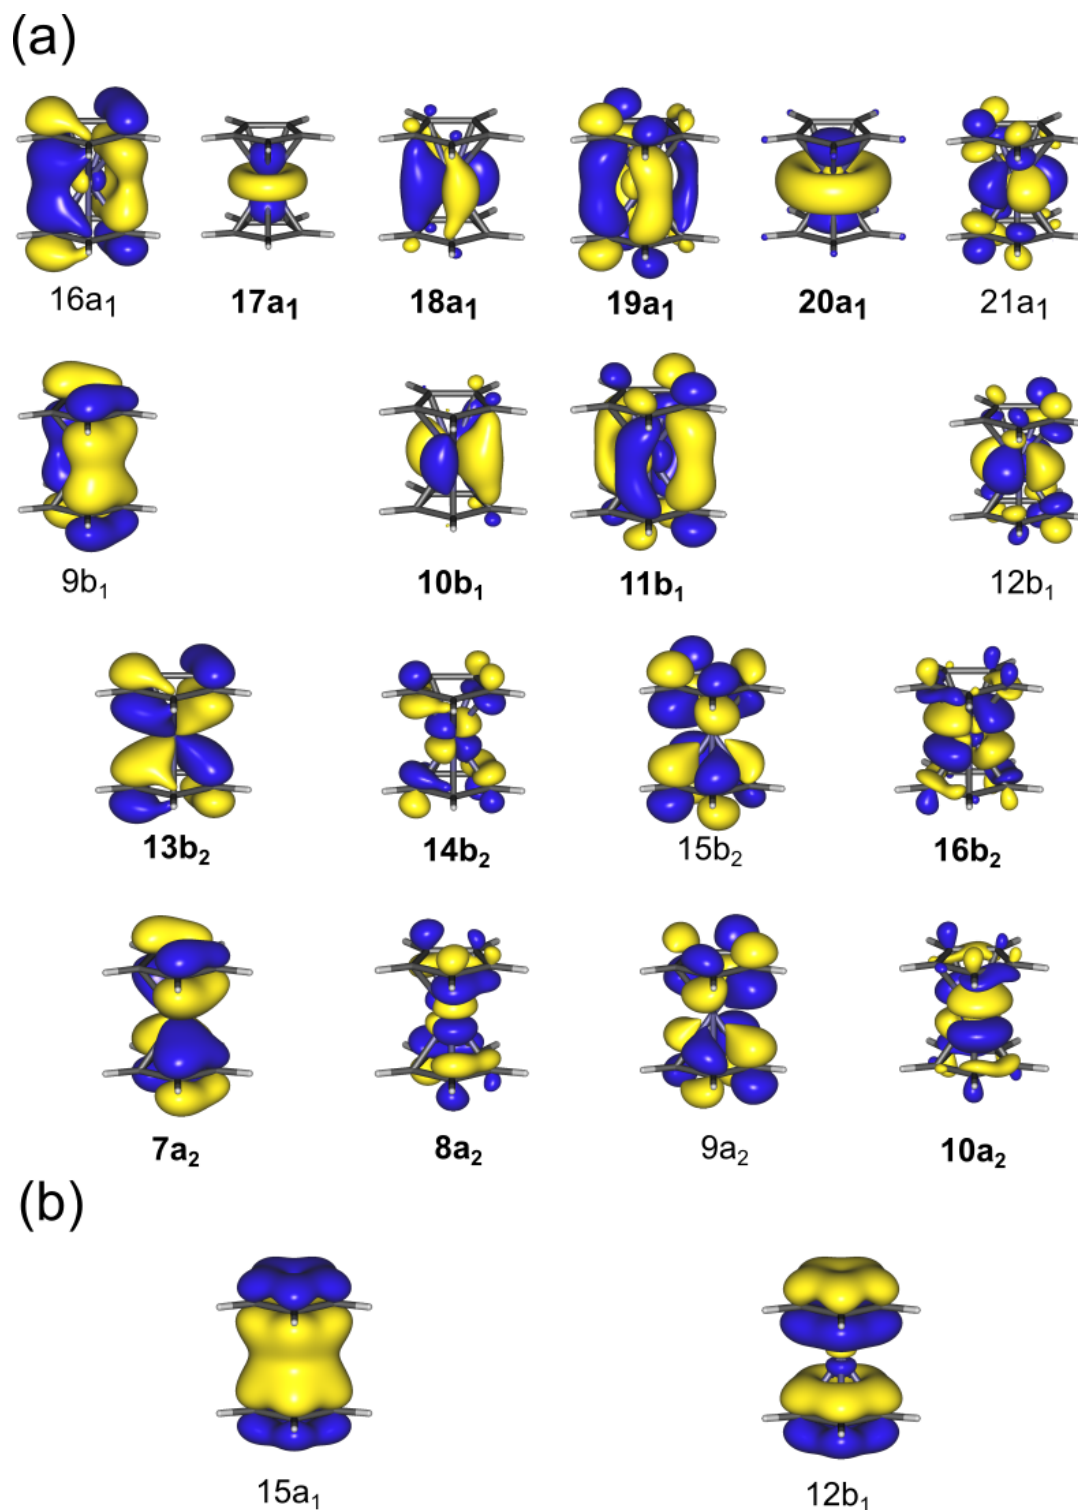

Figure S8. Contour plots of CASSCF natural orbitals for  $[\text{FeCp}_2]$  in singlet ground state. (a) Orbitals of the (14,18) active space, those with bold labels are included in the (10,12) active space; (b) additional orbitals included only in the (18,15) active space. Contour value  $\pm 0.04$  au.



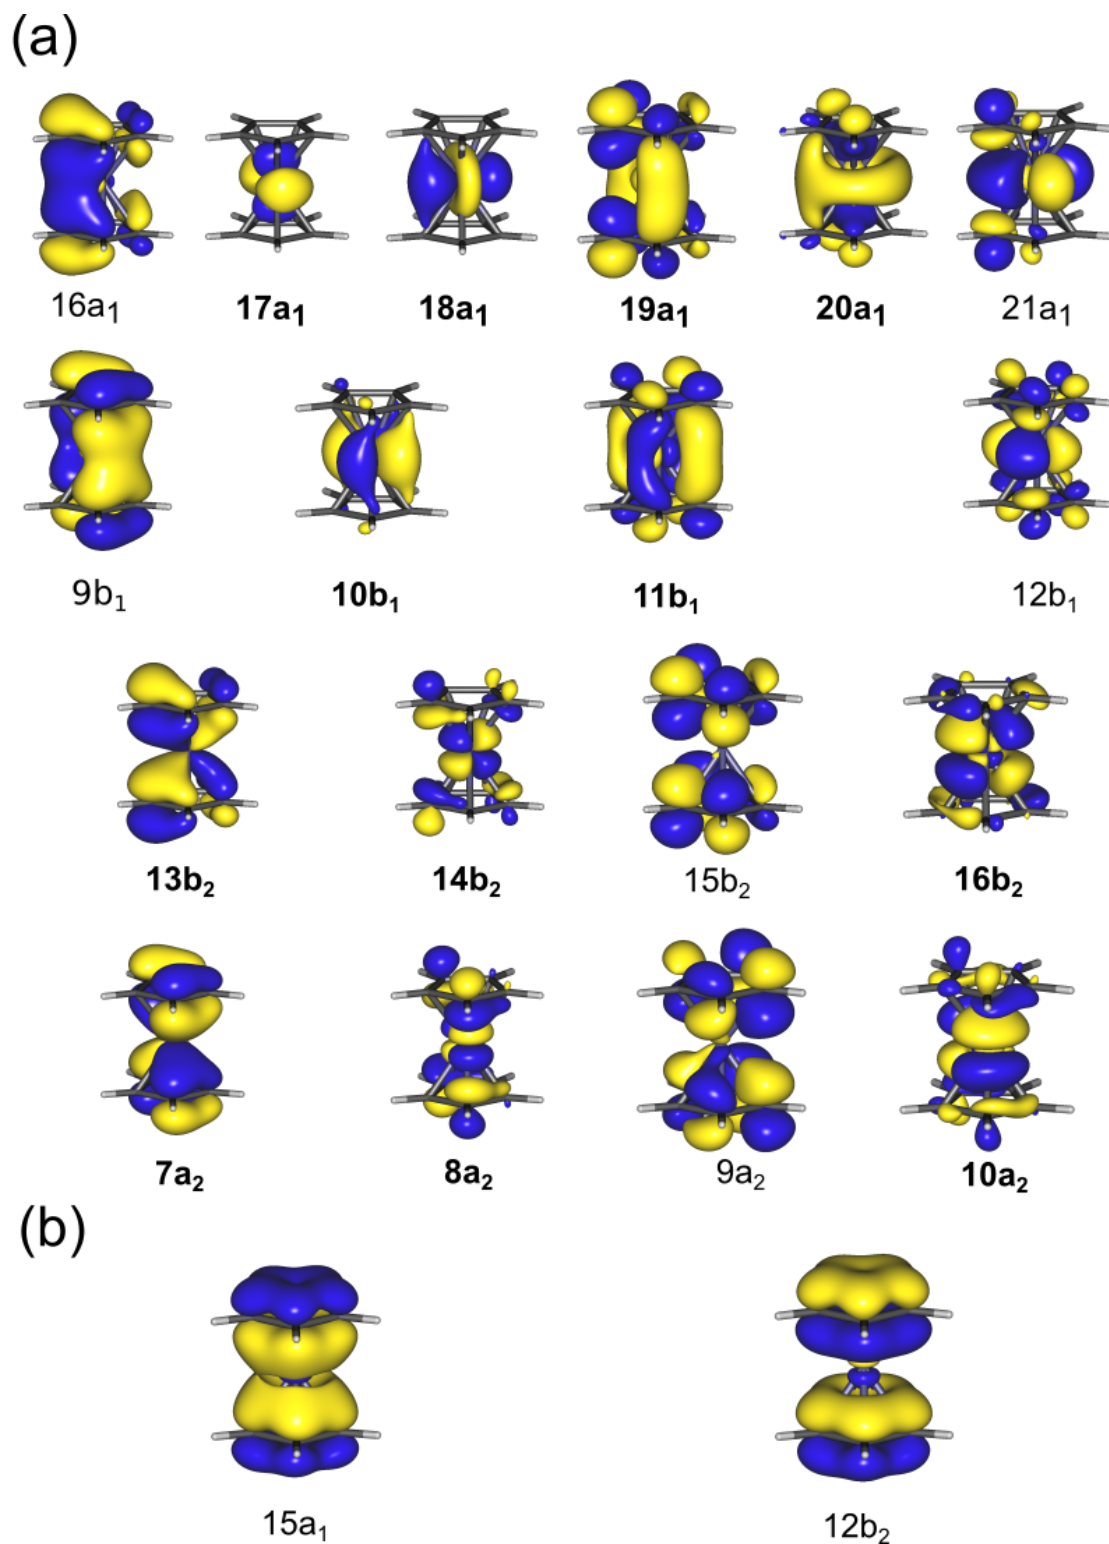

Figure S9. Contour plots of CASSCF natural orbitals for [FeCp<sub>2</sub>] in the lowest triplet excited state (state-specific calculations for one component of T<sub>1</sub>). (a) Orbitals of the (14,18) active space, those with bold labels are included in the (10,12) active space; (b) additional orbitals included only in the (18,15) active space. Contour value  $\pm 0.04$  au.

Table S44. Natural orbital occupation numbers for active orbitals corresponding to difference choices of the active space for [FeCp<sub>2</sub>] in the singlet ground state (S<sub>0</sub>) and the lowest triplet excited (T<sub>1</sub>) state computed vertically for the S<sub>0</sub> geometry.

|      | (14,18)        |                | (18,15)        |                | (14,16)        |                | (10,14)        |                | (10,12)        |                | (10,10)        |                |
|------|----------------|----------------|----------------|----------------|----------------|----------------|----------------|----------------|----------------|----------------|----------------|----------------|
|      | S <sub>0</sub> | T <sub>1</sub> |
| 15a1 | –              | –              | 1.988          | 1.988          | –              | –              | –              | –              | –              | –              | –              | –              |
| 16a1 | 1.968          | 1.961          | 1.968          | 1.973          | 1.970          | 1.961          | –              | –              | –              | –              | –              | –              |
| 17a1 | 1.910          | 1.953          | 1.996          | 1.021          | 1.966          | 1.954          | 1.967          | 1.945          | 1.964          | 1.959          | 1.963          | 1.958          |
| 18a1 | 1.910          | 1.001          | 1.907          | 1.919          | 1.915          | 0.992          | 1.919          | 1.037          | 1.931          | 1.063          | 1.934          | 0.998          |
| 19a1 | 0.079          | 0.066          | 0.088          | 0.089          | 0.077          | 0.065          | 0.063          | 0.048          | 0.052          | 0.036          | 0.053          | 0.039          |
| 20a1 | 0.028          | 0.021          | –              | –              | 0.029          | 0.026          | 0.027          | 0.013          | 0.030          | 0.016          | 0.032          | 0.016          |
| 21a1 | 0.005          | 0.006          | –              | –              | 0.005          | 0.008          | 0.003          | 0.003          | –              | –              | –              | –              |
| 9b1  | 1.968          | 1.965          | 1.968          | 1.966          | 1.970          | 1.968          | –              | –              | –              | –              | –              | –              |
| 10b1 | 1.910          | 1.914          | 1.907          | 1.893          | 1.915          | 1.925          | 1.919          | 1.885          | 1.931          | 1.874          | 1.934          | 1.933          |
| 11b1 | 0.079          | 0.071          | 0.088          | 0.094          | 0.077          | 0.070          | 0.063          | 0.058          | 0.052          | 0.043          | 0.053          | 0.049          |
| 12b1 | 0.005          | 0.006          | –              | –              | 0.005          | 0.007          | 0.003          | 0.003          | –              | –              | –              | –              |
| 12b2 | –              | –              | 1.983          | 1.983          | –              | –              | –              | –              | –              | –              | –              | –              |
| 13b2 | 1.916          | 1.945          | 1.919          | 1.954          | 1.923          | 1.946          | 1.933          | 1.974          | 1.941          | 1.937          | 1.948          | 1.982          |
| 14b2 | 0.096          | 0.998          | 0.095          | 1.006          | 0.085          | 1.008          | 0.083          | 0.969          | 0.077          | 0.146          | 0.087          | 1.010          |
| 15b2 | 0.029          | 0.043          | 0.039          | 0.042          | 0.028          | 0.043          | 0.001          | 0.008          | 0.001          | 0.002          | –              | –              |
| 16b2 | 0.002          | 0.008          | –              | –              | –              | –              | –              | –              | –              | –              | –              | –              |
| 7a2  | 1.916          | 1.904          | 1.919          | 1.892          | 1.923          | 1.911          | 1.933          | 1.924          | 1.941          | 1.976          | 1.948          | 1.940          |
| 8a2  | 0.096          | 0.108          | 0.095          | 0.141          | 0.085          | 0.093          | 0.083          | 0.132          | 0.077          | 0.938          | 0.067          | 0.081          |
| 9a2  | 0.029          | 0.025          | 0.039          | 0.043          | 0.028          | 0.023          | 0.002          | 0.002          | 0.001          | 0.009          | –              | –              |
| 10a2 | 0.002          | 0.002          | –              | –              | –              | –              | –              | –              | –              | –              | –              | –              |

“–” means that given orbital is not included (inactive or secondary) for a given active space.

## 7. Detailed multiconfigurational results

Table S45. Detailed multiconfigurational results for [MnCp<sub>2</sub>] doublet–sextet adiabatic energy. <sup>a</sup>

|                                 | E (S=1/2)<br>(a.u.) | E (S=5/2)<br>(a.u.) | ΔE<br>(eV) |
|---------------------------------|---------------------|---------------------|------------|
| CASSCF(9,12)                    | -1542.103230        | -1542.167382        | -1.75      |
| CASPT2(9,12)                    | -1544.304084        | -1544.301667        | 0.07       |
| CASPT2(9,12) Frozen 3s3p        | -1543.882263        | -1543.887679        | -0.15      |
| pc-NEVPT2(9,12)                 | -1544.266035        | -1544.244897        | 0.58       |
| sc-NEVPT2(9,12)                 | -1544.254798        | -1544.238062        | 0.46       |
| MRCISD(9,12)                    | -1543.686614        | -1543.711428        | -0.68      |
| MRCISD+Q(D)(9,12) <sup>b</sup>  | -1544.126685        | -1544.138207        | -0.31      |
| MRCISD+Q(DS)(9,12) <sup>b</sup> | -1544.296072        | -1544.301230        | -0.14      |
| MRCISD+Q(P)(9,12) <sup>b</sup>  | -1544.272246        | -1544.278265        | -0.16      |
| C <sub>0</sub> <sup>c</sup>     | 0.884599            | 0.885128            |            |

<sup>a</sup> Single-point calculations for PBE0/def2-TZVP structures, using the cT(D)-DK basis set. <sup>b</sup> Energies including Davidson (D), Davidson-Silver (DS), or Pople (P) size-extensivity correction (fixed reference). <sup>c</sup> Coefficient of the reference function in the MRCISD wave function (fixed reference) used for determining size-extensivity corrections.

Table S46. Detailed multiconfigurational results for [FeCp<sub>2</sub>], S<sub>0</sub> → T<sub>1</sub> vertical excitation energy. <sup>a</sup>

|                                  | E (S=0)<br>(a.u.) | E (S=1)<br>(a.u.) | ΔE<br>(eV) |
|----------------------------------|-------------------|-------------------|------------|
| CASSCF(10,12)                    | -1656.152212      | -1656.081998      | 1.91       |
| CASPT2(10,12)                    | -1658.420670      | -1658.346359      | 2.02       |
| CASPT2(10,12) Frozen 3s3p        | -1657.988749      | -1657.913720      | 2.04       |
| pc-NEVPT2(10,12)                 | -1658.380034      | -1658.292827      | 2.37       |
| sc-NEVPT2(10,12)                 | -1658.366528      | -1658.280191      | 2.35       |
| MRCISD(10,12)                    | -1657.777165      | -1657.703989      | 1.99       |
| MRCISD+Q(D)(10,12) <sup>b</sup>  | -1658.224300      | -1658.150229      | 2.02       |
| MRCISD+Q(DS)(10,12) <sup>b</sup> | -1658.394047      | -1658.319594      | 2.03       |
| MRCISD+Q(P)(10,12) <sup>b</sup>  | -1658.370105      | -1658.295705      | 2.02       |
| C <sub>0</sub> <sup>c</sup>      | 0.885556          | 0.885574          |            |

<sup>a</sup> Single-point calculations for BP86/def2-TZVP structure of the singlet ground state, using the cT(D)-DK basis set.

<sup>b</sup> Energies including Davidson (D), Davidson-Silver (DS), or Pople (P) size-extensivity correction (fixed reference).

<sup>c</sup> Coefficient of the reference function in the MRCISD wave function (fixed reference) used for determining size-extensivity corrections.

Table S47. Detailed multiconfigurational results for  $[\text{CoCp}_2]^+$ ,  $S_0 \rightarrow T_1$  vertical excitation energy. <sup>a</sup>

|                                  | E (S=0)<br>(a.u.) | E (S=1)<br>(a.u.) | $\Delta E$<br>(eV) |
|----------------------------------|-------------------|-------------------|--------------------|
| CASSCF(10,12)                    | -1776.542524      | -1776.463180      | 2.16               |
| CASPT2(10,12)                    | -1778.808319      | -1778.720571      | 2.39               |
| CASPT2(10,12) Frozen 3s3p        | -1778.373244      | -1778.286428      | 2.36               |
| pc-NEVPT2(10,12)                 | -1778.752332      | -1778.653838      | 2.68               |
| sc-NEVPT2(10,12)                 | -1778.735519      | -1778.637612      | 2.66               |
| MRCISD(10,12)                    | -1778.179353      | -1778.094994      | 2.30               |
| MRCISD+Q(D)(10,12) <sup>b</sup>  | -1778.618071      | -1778.532713      | 2.32               |
| MRCISD+Q(DS)(10,12) <sup>b</sup> | -1778.778718      | -1778.693167      | 2.33               |
| MRCISD+Q(P)(10,12) <sup>b</sup>  | -1778.755886      | -1778.670368      | 2.33               |
| $C_0$ <sup>c</sup>               | 0.888046          | 0.887972          |                    |

<sup>a</sup> Single-point calculations for BP86/def2-TZVP structure of the singlet ground state, using the cT(D)-DK basis set.

<sup>b</sup> Energies including Davidson (D), Davidson-Silver (DS), or Pople (P) size-extensivity correction (fixed reference).

<sup>c</sup> Coefficient of the reference function in the MRCISD wave function (fixed reference) used for determining size-extensivity corrections.

Table S48. Detailed multiconfigurational results for [RuCp<sub>2</sub>], S<sub>0</sub>–T<sub>1</sub> adiabatic energy. <sup>a</sup>

|                                           | E (S=0)<br>(a.u.) | E (S=1)<br>(a.u.) | ΔE<br>(eV) |
|-------------------------------------------|-------------------|-------------------|------------|
| CASSCF(10,12)fix <sup>b</sup>             | -478.541623       | -478.449789       | 2.50       |
| CASPT2(10,12)fix <sup>b</sup>             | -480.804256       | -480.691941       | 3.06       |
| CASPT2(10,12)fix Frozen 4s4p <sup>b</sup> | -480.417061       | -480.303605       | 3.09       |
| pc-NEVPT2(10,12)fix <sup>b</sup>          | -480.788554       | -480.653236       | 3.68       |
| sc-NEVPT2(10,12)fix <sup>b</sup>          | -480.778994       | -480.644669       | 3.66       |
| MRCISD(10,12)fix <sup>b</sup>             | -480.127947       | -480.025801       | 2.78       |
| MRCISD+Q(D)(10,12)fix <sup>b,c</sup>      | -480.591801       | -480.487579       | 2.84       |
| MRCISD+Q(DS)(10,12)fix <sup>b,c</sup>     | -480.783485       | -480.678957       | 2.84       |
| MRCISD+Q(P)(10,12)fix <sup>b,c</sup>      | -480.745155       | -480.640706       | 2.84       |
| C <sub>0</sub> <sup>d</sup>               | 0.879630          | 0.879427          |            |

<sup>a</sup> Single-point calculations for BP86/def2-TZVP structures, using the cT(D)-PP basis set. <sup>b</sup> “(10,12)fix” means that double-shell orbitals d'xz and d'yz were taken from CASSCF(10,12) state-average calculations of six lowest triplet roots (all components of the T<sub>1</sub>, T<sub>2</sub>, T<sub>3</sub> states) and not optimized any further. <sup>c</sup> Energies including Davidson (D), Davidson-Silver (DS), or Pople (P) size-extensivity correction (fixed reference). <sup>d</sup> Coefficient of the reference function in the MRCISD wave function (fixed reference) used for determining size-extensivity corrections.

Table S49. Detailed multiconfigurational results for [RuCp<sub>2</sub>], S<sub>0</sub> → T<sub>1</sub> vertical excitation energy. <sup>a</sup>

|                                        | E (S=0)<br>(a.u.) | E (S=1)<br>(a.u.) | ΔE<br>(eV) |
|----------------------------------------|-------------------|-------------------|------------|
| CASSCF(10,12) <sup>b</sup>             | -478.541984       | -478.413088       | 3.51       |
| CASSCF(10,12)fix <sup>c</sup>          | -478.541623       | -478.413041       | 3.50       |
| CASPT2(10,12) <sup>b</sup>             | -480.804375       | -480.679426       | 3.40       |
| CASPT2(10,12)fix <sup>c</sup>          | -480.804256       | -480.679518       | 3.39       |
| CASPT2(10,12) Frozen 4s4p <sup>b</sup> | -480.417246       | -480.289302       | 3.48       |
| pc-NEVPT2(10,12)fix <sup>c</sup>       | -480.788554       | -480.655757       | 3.61       |
| sc-NEVPT2(10,12)fix <sup>c</sup>       | -480.778994       | -480.645470       | 3.63       |
| MRCISD(10,12)fix <sup>c</sup>          | -480.127947       | -479.999918       | 3.48       |
| MRCISD+Q(D)(10,12)fix <sup>c,d</sup>   | -480.591801       | -480.464195       | 3.47       |
| MRCISD+Q(DS)(10,12)fix <sup>c,d</sup>  | -480.783485       | -480.656206       | 3.46       |
| MRCISD+Q(P)(10,12)fix <sup>c,d</sup>   | -480.745155       | -480.617816       | 3.47       |
| C <sub>0</sub> <sup>e</sup>            | 0.879630          | 0.879574          |            |

<sup>a</sup> Single-point calculations for BP86/def2-TZVP structure of the singlet ground state, using the cT(D)-PP basis set.

<sup>b</sup> CASSCF(10,12) for S<sub>0</sub> state could be converged to desired solution only with Molcas. <sup>c</sup> “(10,12)fix” means that double-shell orbitals d<sup>’</sup>xz and d<sup>’</sup>yz were taken from CASSCF(10,12) state-average calculations of six lowest triplet roots (all components of the T<sub>1</sub>, T<sub>2</sub>, T<sub>3</sub> states) and not optimized any further. <sup>d</sup> Energies including Davidson (D), Davidson-Silver (DS), or Pople (P) size-extensivity correction (fixed reference). <sup>e</sup> Coefficient of the reference function in the MRCISD wave function (fixed reference) used for determining size-extensivity corrections.

Table S50. Detailed multiconfigurational results for [RuCp<sub>2</sub>], T<sub>1</sub> → S<sub>0</sub> vertical emission energy. <sup>a</sup>

|                                           | E (S=0)<br>(a.u.) | E (S=1)<br>(a.u.) | ΔE<br>(eV) |
|-------------------------------------------|-------------------|-------------------|------------|
| CASSCF(10,12)fix <sup>b</sup>             | -478.532390       | -478.459370       | 1.99       |
| CASPT2(10,12)fix <sup>b</sup>             | -480.765424       | -480.693107       | 1.97       |
| CASPT2(10,12)fix Frozen 4s4p <sup>b</sup> | -480.379974       | -480.304921       | 2.04       |
| pc-NEVPT2(10,12)fix <sup>b</sup>          | -480.739291       | -480.659525       | 2.17       |
| sc-NEVPT2(10,12)fix <sup>b</sup>          | -480.729722       | -480.650053       | 2.17       |
| MRCISD(10,12)fix <sup>b</sup>             | -480.106404       | -480.032857       | 2.00       |
| MRCISD+Q(D)(10,12)fix <sup>b,c</sup>      | -480.566449       | -480.492667       | 2.01       |
| MRCISD+Q(DS)(10,12)fix <sup>b,c</sup>     | -480.756438       | -480.682512       | 2.01       |
| MRCISD+Q(P)(10,12)fix <sup>b,c</sup>      | -480.718443       | -480.644544       | 2.01       |
| C <sub>0</sub> <sup>d</sup>               | 0.879675          | 0.879693          |            |

<sup>a</sup> Single-point calculations performed with the cT(D)-PP basis set, for, for UHF-CCSD(T)/cT(D)-PP geometry of the triplet excited state. <sup>b</sup> “(10,12)fix” means that double-shell orbitals d’xz and d’yz were taken from CASSCF(10,12) state-average calculations of six lowest triplet roots (all components of the T<sub>1</sub>, T<sub>2</sub>, T<sub>3</sub> states) and not optimized any further. <sup>c</sup> Energies including Davidson (D), Davidson-Silver (DS), or Pople (P) size-extensivity correction (fixed reference). <sup>d</sup> Coefficient of the reference function in the MRCISD wave function (fixed reference) used for determining size-extensivity corrections.



Table S51. Vertical energy difference between  $S_1$  and  $T_1$  excited states of  $[\text{FeCp}_2]$ .<sup>a</sup>

| method        | basis set                        | $E(T_1)$<br>(a.u.) | $E(S_1)$<br>(a.u.) | $\Delta E$<br>(eV) |
|---------------|----------------------------------|--------------------|--------------------|--------------------|
| CASPT2(10,12) | cT(D)-DK                         | -1658.346359       | -1658.316071       | 0.82               |
|               | cQ-DK <sup>b</sup>               | -1658.560073       | -1658.530909       | 0.79               |
|               | c5/Q-DK <sup>c</sup>             | -1658.580428       | -1658.551696       | 0.78               |
|               | estimated CBS limit <sup>d</sup> |                    |                    | 0.77               |
| NEVPT2(10,12) | cT(D)-DK                         | -1658.292827       | -1658.266470       | 0.72               |
|               | estimated CBS limit <sup>e</sup> |                    |                    | 0.66               |

<sup>a</sup> Single-point calculations for BP86/def2TZVP geometry of the singlet ground state.

<sup>b</sup> cQ-DK basis set: cc-pwCVQZ-DK (Fe) / cc-pVQZ (C,H).

<sup>c</sup> c5/Q-DK basis set: cc-pwCV5Z-DK (Fe) / cc-pVQZ (C,H).

<sup>d</sup> Estimated from equation  $E(\text{CBS}) = A + B(X+3/2)^4$ , where  $X=5$  for c5/Q-DK,  $X=4$  for cQ-DK.

<sup>e</sup> Estimated as  $\Delta E(\text{NEVPT2}/\text{cT(D)-DK}) + \Delta E(\text{CASPT2}/\text{CBS}) - \Delta E(\text{CASPT2}/\text{cT(D)-DK})$ .

Table S52. Vertical energy difference between  $S_1$  and  $T_1$  excited states of  $[\text{CoCp}_2]^+$ .<sup>a</sup>

| method        | basis set                        | $E(T_1)$<br>(a.u.) | $E(S_1)$<br>(a.u.) | $\Delta E$<br>(eV) |
|---------------|----------------------------------|--------------------|--------------------|--------------------|
| CASPT2(10,12) | cT(D)-DK                         | -1778.720571       | -1778.694292       | 0.72               |
|               | cQ-DK <sup>b</sup>               | -1778.936967       | -1778.911303       | 0.70               |
|               | c5/Q-DK <sup>b</sup>             | -1778.959826       | -1778.934579       | 0.69               |
|               | estimated CBS limit <sup>c</sup> |                    |                    | 0.68               |
| NEVPT2(10,12) | T(D)-DK                          | -1778.653838       | -1778.629756       | 0.66               |
|               | estimated CBS limit <sup>d</sup> |                    |                    | 0.62               |

<sup>a</sup> Single-point calculations for BP86/def2TZVP geometry of the singlet ground state.

<sup>b</sup> See previous table for definition of cQ-DK and c5/Q-DK basis sets.

<sup>c</sup> Estimated from equation  $E(\text{CBS}) = A + B(X+3/2)^4$ , where  $X=5$  for c5/Q-DK,  $X=4$  for cQ-DK.

<sup>d</sup> Estimated using additive CBS correction taken from CASPT2 calculations, i.e.

$\Delta E(\text{NEVPT2}/\text{CBS}) = \Delta E(\text{NEVPT2}/\text{cT(D)-DK}) + \Delta E(\text{CASPT2}/\text{CBS}) - \Delta E(\text{CASPT2}/\text{cT(D)-DK})$ .

Table S53. Vertical energy difference between S<sub>1</sub> and T<sub>1</sub> excited states of [RuCp<sub>2</sub>].<sup>a</sup>

| method           | basis set                        | E(T <sub>1</sub> )<br>(a.u.) | E(S <sub>1</sub> )<br>(a.u.) | ΔE<br>(eV) |
|------------------|----------------------------------|------------------------------|------------------------------|------------|
| CASPT2(10,12)fix | cT(D)-PP                         | -480.679518                  | -480.662266                  | 0.47       |
|                  | cQ-PP <sup>b</sup>               | -480.897314                  | -480.881063                  | 0.44       |
|                  | c5/Q-PP <sup>c</sup>             | -480.919534                  | -480.903714                  | 0.43       |
|                  | estimated CBS limit <sup>d</sup> |                              |                              | 0.42       |
| NEVPT2(10,12)fix | cT(D)-PP                         | -480.655757                  | -480.640728                  | 0.41       |
|                  | estimated CBS limit <sup>e</sup> |                              |                              | 0.36       |

<sup>a</sup> Single-point calculations for BP86/def2TZVP geometry of the singlet ground state.

<sup>b</sup> cQ-PP basis set: cc-pwCVQZ-PP (Ru) / cc-pVQZ (C, H).

<sup>c</sup> c5/Q-PP basis set cc-pwCV5Z-PP (Ru) / cc-pVQZ (C, H).

<sup>d</sup> Estimated from equation  $E(\text{CBS}) = A + B(X+3/2)^4$ , where X=5 for c5/Q-DK, X=4 for cQ-DK.

<sup>e</sup> Estimated using additive CBS correction taken from CASPT2 calculations, i.e.

$\Delta E(\text{NEVPT2/CBS}) = \Delta E(\text{NEVPT2/cT(D)-PP}) + \Delta E(\text{CASPT2/CBS}) - \Delta E(\text{CASPT2/cT(D)-PP})$ .

Table S54. Dependence of multiconfigurational results on the choice of active space for [FeCp<sub>2</sub>], S<sub>0</sub> → T<sub>1</sub> vertical excitation energy. <sup>a</sup>

| method                   | active space            | E (S=0)<br>(a.u.) | E (S=1)<br>(a.u.) | ΔE<br>(eV) |
|--------------------------|-------------------------|-------------------|-------------------|------------|
| CASSCF                   | (10,10)                 | -1656.145101      | -1656.055217      | 2.45       |
|                          | (10,12)                 | -1656.152212      | -1656.081998      | 1.91       |
|                          | (10,12)fix <sup>b</sup> | -1656.151921      | -1656.081924      | 1.90       |
|                          | (10,14)                 | -1656.169999      | -1656.098149      | 1.96       |
|                          | (14,16)                 | -1656.205764      | -1656.118333      | 2.38       |
|                          | (18,15)                 | -1656.156194      | -1656.087176      | 1.88       |
|                          | (14,18)                 | -1656.217255      | -1656.146197      | 1.93       |
| CASPT2                   | (10,10)                 | -1658.421103      | -1658.351072      | 1.91       |
|                          | (10,12)                 | -1658.420670      | -1658.346359      | 2.02       |
|                          | (10,12)fix <sup>b</sup> | -1658.420595      | -1658.346610      | 2.01       |
|                          | (10,14)                 | -1658.420670      | -1658.346604      | 2.02       |
|                          | (14,16)                 | -1658.408745      | -1658.339415      | 1.89       |
|                          | (18,15)                 | -1658.422995      | -1658.357969      | 1.77       |
|                          | (14,18)                 | -1658.409359      | -1658.334024      | 2.05       |
| pc-NEVPT2                | (10,10)                 | -1658.389924      | -1658.313551      | 2.08       |
|                          | (10,12)                 | -1658.380034      | -1658.292827      | 2.37       |
|                          | (10,12)fix <sup>b</sup> | -1658.378917      | -1658.293198      | 2.33       |
|                          | (10,14)                 | -1658.388784      | -1658.305366      | 2.27       |
| MRCISD+Q(D) <sup>c</sup> | (10,10)                 | -1658.222660      | -1658.142468      | 2.18       |
|                          | (10,12)                 | -1658.224300      | -1658.150229      | 2.02       |
|                          | (10,12)fix <sup>b</sup> | -1658.224187      | -1658.150299      | 2.01       |
|                          | (10,14)                 | -1658.228896      | -1658.154621      | 2.02       |

<sup>a</sup> Single point calculations performed for BP86/def2-TZVP structure of the singlet ground state, using the cT(D)-DK basis set. <sup>b</sup> “(10,12)fix” means that double-shell orbitals d’xz and d’yz were taken from CASSCF(10,12) state-average calculations of six lowest triplet roots (all components of the T<sub>1</sub>, T<sub>2</sub>, T<sub>3</sub> states) and not optimized any further. <sup>c</sup> Energies including Davidson (D) size-extensivity correction (fixed reference).

Table S55. Dependence of multiconfigurational results on the choice of active space for  $[\text{CoCp}_2]^+$ ,  $S_0 \rightarrow T_1$  vertical excitation energy. <sup>a</sup>

| method                   | active space            | E (S=0)<br>(a.u.) | E (S=1)<br>(a.u.) | $\Delta E$<br>(eV) |
|--------------------------|-------------------------|-------------------|-------------------|--------------------|
| CASSCF                   | (10,10)                 | -1776.529084      | -1776.426666      | 2.79               |
|                          | (10,12)                 | -1776.542524      | -1776.463180      | 2.16               |
|                          | (10,12)fix <sup>b</sup> | -1776.542241      | -1776.462885      | 2.16               |
| CASPT2                   | (10,10)                 | -1778.811487      | -1778.729047      | 2.24               |
|                          | (10,12)                 | -1778.808319      | -1778.720571      | 2.39               |
|                          | (10,12)fix <sup>b</sup> | -1778.808326      | -1778.720598      | 2.39               |
| pc-NEVPT2                | (10,10)                 | -1778.762680      | -1778.675993      | 2.36               |
|                          | (10,12)                 | -1778.752332      | -1778.653838      | 2.68               |
|                          | (10,12)fix <sup>b</sup> | -1778.751427      | -1778.654010      | 2.65               |
| MRCISD+Q(D) <sup>c</sup> | (10,10)                 | -1778.615506      | -1778.523846      | 2.49               |
|                          | (10,12)                 | -1778.618071      | -1778.532713      | 2.32               |
|                          | (10,12)fix <sup>b</sup> | -1778.617977      | -1778.532680      | 2.32               |

<sup>a</sup> Single-point calculations for BP86/def2-TZVP structure of singlet ground state, using the cT(D)-DK basis set.

<sup>b</sup> “(10,12)fix” means that double-shell orbitals  $d'_{xz}$  and  $d'_{yz}$  were taken from CASSCF(10,12) state-average calculations of six lowest triplet roots (all components of the  $T_1$ ,  $T_2$ ,  $T_3$  states) and not optimized any further.

<sup>c</sup> Energies including Davidson (D) size-extensivity correction (fixed reference).

Table S56. Dependence of multiconfigurational results on the choice of active space for RuCp<sub>2</sub>, S<sub>0</sub> - T<sub>1</sub> adiabatic energy. <sup>a</sup>

| method                   | active space            | E (S=0)<br>(a.u.) | E (S=1)<br>(a.u.) | ΔE<br>(eV) |
|--------------------------|-------------------------|-------------------|-------------------|------------|
| CASSCF                   | (10,10)                 | -478.539548       | -478.434462       | 2.86       |
|                          | (10,12)fix <sup>b</sup> | -478.541623       | -478.449789       | 2.50       |
| CASPT2                   | (10,10)                 | -480.804074       | -480.692819       | 3.03       |
|                          | (10,12)fix <sup>b</sup> | -480.804256       | -480.691941       | 3.06       |
| pc-NEVPT2                | (10,10)                 | -480.792763       | -480.672976       | 3.26       |
|                          | (10,12)fix <sup>b</sup> | -480.788554       | -480.653236       | 3.68       |
| MRCISD+Q(D) <sup>c</sup> | (10,10)                 | -480.591316       | -480.481714       | 2.98       |
|                          | (10,12)fix <sup>b</sup> | -480.591801       | -480.487579       | 2.84       |

<sup>a</sup> Single-point calculations for BP86/def2-TZVP structures, using the cT(D)-PP basis set. <sup>b</sup> “(10,12)fix” means that double-shell orbitals d'xz and d'yz were taken from CASSCF(10,12) state-average calculations of six lowest triplet roots (all components of the T<sub>1</sub>, T<sub>2</sub>, T<sub>3</sub> states) and not optimized any further. <sup>c</sup> Energies including Davidson (D) size-extensivity correction (fixed reference).

Table S57. Dependence of multiconfigurational results on the choice of active space for RuCp<sub>2</sub>, S<sub>0</sub> → T<sub>1</sub> vertical excitation energy. <sup>a</sup>

| method                   | active space            | E (S=0)<br>(a.u.) | E (S=1)<br>(a.u.) | ΔE<br>(eV) |
|--------------------------|-------------------------|-------------------|-------------------|------------|
| CASSCF                   | (10,10)                 | -478.539548       | -478.399368       | 3.81       |
|                          | (10,12) <sup>b</sup>    | -478.541984       | -478.413088       | 3.51       |
|                          | (10,12)fix <sup>c</sup> | -478.541623       | -478.413041       | 3.50       |
| CASPT2                   | (10,10)                 | -480.804074       | -480.679386       | 3.39       |
|                          | (10,12) <sup>b</sup>    | -480.804375       | -480.679426       | 3.40       |
|                          | (10,12)fix <sup>c</sup> | -480.804256       | -480.679518       | 3.39       |
| pc-NEVPT2                | (10,10)                 | -480.792763       | -480.662643       | 3.54       |
|                          | (10,12)fix <sup>c</sup> | -480.788554       | -480.655757       | 3.61       |
| MRCISD+Q(D) <sup>d</sup> | (10,10)                 | -480.591316       | -480.459458       | 3.59       |
|                          | (10,12)fix <sup>c</sup> | -480.591801       | -480.464195       | 3.47       |

<sup>a</sup> Single-point calculations for BP86/def2-TZVP structure of the singlet ground state, with the cT(D)-PP basis set.

<sup>b</sup> CASSCF(10,12) for S<sub>0</sub> state could be converged to desired solution only with Molcas. <sup>c</sup> “(10,12)fix” means that double-shell orbitals d’xz and d’yz were taken from CASSCF(10,12) state-average calculations of six lowest triplet roots (all components of the T<sub>1</sub>, T<sub>2</sub>, T<sub>3</sub> states) and not optimized any further. <sup>d</sup> Energies including Davidson (D) size-extensivity correction (fixed reference).

Table S58. Dependence of multiconfigurational results on the choice of active space for RuCp<sub>2</sub>, T<sub>1</sub> → S<sub>0</sub> vertical emission energy. <sup>a</sup>

| method                   | active space            | E (S=0)<br>(a.u.) | E (S=1)<br>(a.u.) | ΔE<br>(eV) |
|--------------------------|-------------------------|-------------------|-------------------|------------|
| CASSCF                   | (10,10)                 | -478.529408       | -478.446109       | 2.27       |
|                          | (10,12)fix <sup>b</sup> | -478.532390       | -478.459370       | 1.99       |
| CASPT2                   | (10,10)                 | -480.765536       | -480.693761       | 1.95       |
|                          | (10,12)fix <sup>b</sup> | -480.765424       | -480.693107       | 1.97       |
| pc-NEVPT2                | (10,10)                 | -480.752107       | -480.673660       | 2.13       |
|                          | (10,12)fix <sup>b</sup> | -480.739291       | -480.659525       | 2.17       |
| MRCISD+Q(D) <sup>c</sup> | (10,10)                 | -480.565694       | -480.488238       | 2.11       |
|                          | (10,12)fix <sup>b</sup> | -480.566449       | -480.492667       | 2.01       |

<sup>a</sup> Single-point calculations for UHF-CCSD(T)/cT(D)-PP structure of the triplet excited state performed, using the T(D)-PP basis set. <sup>b</sup> “(10,12)fix” means that double-shell orbitals d’xz and d’yz were taken from CASSCF(10,12) state-average calculations of six lowest triplet roots (all components of the T<sub>1</sub>, T<sub>2</sub>, T<sub>3</sub> states) and not optimized any further. <sup>c</sup> Energies including Davidson (D) size-extensivity correction (fixed reference).

Table S59. CASPT2 excitation energies for eclipsed and staggered conformations of FeCp<sub>2</sub>. <sup>a</sup>

|                | total energies (a.u.) |                        | excitation energies (eV) |                        |
|----------------|-----------------------|------------------------|--------------------------|------------------------|
|                | eclipsed              | staggered <sup>b</sup> | eclipsed                 | staggered <sup>b</sup> |
| S <sub>0</sub> | -1658.420549          | -1658.418280           |                          |                        |
| T <sub>1</sub> | -1658.350187          | -1658.350139           | 1.91                     | 1.85                   |
| T <sub>2</sub> | -1658.343617          | -1658.344104           | 2.09                     | 2.02                   |
| T <sub>3</sub> | -1658.331056          | -1658.330312           | 2.44                     | 2.39                   |

<sup>a</sup> All calculations reported at the CASPT2(10,12)/cT(D)-DK level for BP86 geometries. For triplet states SA6 (state-average) calculations were performed. For singlet state, the (10,12)fix approximation was consistently applied for both conformations because fully optimized (10,12) could not be obtained for the staggered one due to undesired orbital rotations. <sup>b</sup> Staggered “conformation” is saddle point at DFT:BP86 level (see main article).

Table S60. Estimated solvation effect (EtOH) on CASPT2 vertical excitation energies for FeCp<sub>2</sub>. <sup>a</sup>

| Spin state                                       | g/g <sup>b</sup> | s/g <sup>c</sup> | g/s <sup>d</sup> | s/s <sup>e</sup> |
|--------------------------------------------------|------------------|------------------|------------------|------------------|
| total energies, in a.u.: <sup>a</sup>            |                  |                  |                  |                  |
| S <sub>0</sub>                                   | -1658.420670     | -1658.436072     | -1658.420818     | -1658.436308     |
| T <sub>1</sub>                                   | -1658.350227     | -1658.365919     | -1658.349369     | -1658.365112     |
| T <sub>2</sub>                                   | -1658.343723     | -1658.359260     | -1658.349368     | -1658.358311     |
| T <sub>3</sub>                                   | -1658.331087     | -1658.346869     | -1658.342639     | -1658.346345     |
| S <sub>1</sub>                                   | -1658.318446     | -1658.334311     | -1658.342647     | -1658.333724     |
| S <sub>2</sub>                                   | -1658.314502     | -1658.330302     | -1658.330512     | -1658.329377     |
| S <sub>3</sub>                                   | -1658.278853     | -1658.294622     | -1658.330511     | -1658.294131     |
| excitation energies from S <sub>0</sub> , in eV: |                  |                  |                  |                  |
| T <sub>1</sub>                                   | 1.92             | 1.91             | 1.94             | 1.94             |
| T <sub>2</sub>                                   | 2.09             | 2.09             | 1.94             | 2.12             |
| T <sub>3</sub>                                   | 2.44             | 2.43             | 2.13             | 2.45             |
| S <sub>1</sub>                                   | 2.78             | 2.77             | 2.13             | 2.79             |
| S <sub>2</sub>                                   | 2.89             | 2.88             | 2.46             | 2.91             |
| S <sub>3</sub>                                   | 3.86             | 3.85             | 2.46             | 3.87             |

<sup>a</sup> All energies calculated at CASPT2(10,12)/cT(D)-DK level for BP86 geometries, optimized either in gas phase or within the COSMO model of ethanol ( $\epsilon=24.3$ ); excitation energies calculated either in gas phase or within the PCM model (ethanol) with non-equilibrium solvation of excited states. <sup>b</sup> g/g = Geometry optimized and vertical excitations energy calculated in gas phase. <sup>c</sup> s/g = Energy calculation in solvent model for geometry optimized in gas phase. <sup>d</sup> g/s = Energies calculated in gas phase for geometry optimized in solvent model. <sup>e</sup> s/s = Energies calculated in solvent model for geometry optimized in solvent model.



Table S61. Estimated solvation effect (water) on CASPT2 vertical exc. energies for [CoCp<sub>2</sub>]<sup>+</sup>. <sup>a</sup>

| Spin state                                       | g/g <sup>b</sup> | s/g <sup>c</sup> | g/s <sup>d</sup> | s/s <sup>e</sup> |
|--------------------------------------------------|------------------|------------------|------------------|------------------|
| total energies, in a.u.: <sup>a</sup>            |                  |                  |                  |                  |
| S <sub>0</sub>                                   | -1778.808319     | -1778.899297     | -1778.808783     | -1778.900123     |
| T <sub>1</sub>                                   | -1778.724819     | -1778.817094     | -1778.723410     | -1778.816026     |
| T <sub>2</sub>                                   | -1778.721705     | -1778.814059     | -1778.720231     | -1778.812884     |
| T <sub>3</sub>                                   | -1778.700855     | -1778.793169     | -1778.699811     | -1778.792430     |
| S <sub>1</sub>                                   | -1778.696549     | -1778.788659     | -1778.694940     | -1778.786966     |
| S <sub>2</sub>                                   | -1778.696148     | -1778.788395     | -1778.695093     | -1778.787607     |
| S <sub>3</sub>                                   | -1778.658096     | -1778.750179     | -1778.657013     | -1778.749412     |
| excitation energies from S <sub>0</sub> , in eV: |                  |                  |                  |                  |
| T <sub>1</sub>                                   | 2.27             | 2.24             | 2.32             | 2.29             |
| T <sub>2</sub>                                   | 2.36             | 2.32             | 2.41             | 2.37             |
| T <sub>3</sub>                                   | 2.92             | 2.89             | 2.97             | 2.93             |
| S <sub>1</sub>                                   | 3.04             | 3.01             | 3.10             | 3.08             |
| S <sub>2</sub>                                   | 3.05             | 3.02             | 3.09             | 3.06             |
| S <sub>3</sub>                                   | 4.09             | 4.06             | 4.13             | 4.10             |

<sup>a</sup> All energies calculated at CASPT2(10,12)/cT(D)-DK level for BP86 geometries, optimized either in gas phase or within the COSMO model of water ( $\epsilon=80.4$ ); excitation energies calculated either in gas phase or within the PCM model (water) with non-equilibrium solvation of excited states. <sup>b</sup> g/g = Geometry optimized and vertical excitations energy calculated in gas phase. <sup>c</sup> s/g = Energy calculation in solvent model for geometry optimized in gas phase. <sup>d</sup> g/s = Energies calculated in gas phase for geometry optimized in solvent model. <sup>e</sup> s/s = Energies calculated in solvent model for geometry optimized in solvent model.

Table S62. Estimate solvation effect (heptane) on CASPT2 vertical excitation energies for RuCp<sub>2</sub>.<sup>a</sup>

| Spin state                                       | g/g <sup>b</sup> | s/g <sup>c</sup> | g/s <sup>d</sup> | s/s <sup>e</sup> |
|--------------------------------------------------|------------------|------------------|------------------|------------------|
| total energies, in a.u.: <sup>a</sup>            |                  |                  |                  |                  |
| S <sub>0</sub>                                   | -4914.464025     | -4914.469705     | -4914.463948     | -4914.469475     |
| T <sub>1</sub>                                   | -4914.342643     | -4914.347789     | -4914.342830     | -4914.347985     |
| T <sub>2</sub>                                   | -4914.335122     | -4914.340241     | -4914.335256     | -4914.340469     |
| T <sub>3</sub>                                   | -4914.328365     | -4914.333464     | -4914.328544     | -4914.333652     |
| S <sub>1</sub>                                   | -4914.325680     | -4914.331005     | -4914.325835     | -4914.331170     |
| S <sub>2</sub>                                   | -4914.318740     | -4914.324127     | -4914.319026     | -4914.324356     |
| S <sub>3</sub>                                   | -4914.299345     | -4914.304588     | -4914.299512     | -4914.304765     |
| excitation energies from S <sub>0</sub> , in eV: |                  |                  |                  |                  |
| T <sub>1</sub>                                   | 3.30             | 3.32             | 3.30             | 3.31             |
| T <sub>2</sub>                                   | 3.51             | 3.52             | 3.50             | 3.51             |
| T <sub>3</sub>                                   | 3.69             | 3.71             | 3.68             | 3.70             |
| S <sub>1</sub>                                   | 3.76             | 3.77             | 3.76             | 3.76             |
| S <sub>2</sub>                                   | 3.95             | 3.96             | 3.94             | 3.95             |
| S <sub>3</sub>                                   | 4.48             | 4.49             | 4.47             | 4.48             |

<sup>a</sup> All energies calculated at CASPT2(10,12)/cT(D)-DK level for BP86 geometries, optimized either in gas phase or within the COSMO model of heptane ( $\epsilon=1.92$ ); excitation energies calculated either in gas phase or within the PCM model (heptane) with non-equilibrium solvation of excited states. <sup>b</sup> g/g = Geometry optimized and vertical excitations energy calculated in gas phase. <sup>c</sup> s/g = Energy calculation in solvent model for geometry optimized in gas phase. <sup>d</sup> g/s = Energies calculated in gas phase for geometry optimized in solvent model. <sup>e</sup> s/s = Energies calculated in solvent model for geometry optimized in solvent model.

Table S63. Estimated solvation effect (EtOH) on CASPT2 vertical excitation energies for RuCp<sub>2</sub>.<sup>a</sup>

| Spin state                                       | g/g <sup>b</sup> | s/g <sup>c</sup> | g/s <sup>d</sup> | s/s <sup>e</sup> |
|--------------------------------------------------|------------------|------------------|------------------|------------------|
| total energies, in a.u.: <sup>a</sup>            |                  |                  |                  |                  |
| S <sub>0</sub>                                   | -4914.464025     | -4914.481378     | -4914.463573     | -4914.481061     |
| T <sub>1</sub>                                   | -4914.342643     | -4914.358135     | -4914.343069     | -4914.358637     |
| T <sub>2</sub>                                   | -4914.335122     | -4914.350675     | -4914.335514     | -4914.351263     |
| T <sub>3</sub>                                   | -4914.328365     | -4914.343904     | -4914.328777     | -4914.344368     |
| S <sub>1</sub>                                   | -4914.325680     | -4914.341547     | -4914.326029     | -4914.341976     |
| S <sub>2</sub>                                   | -4914.318740     | -4914.334595     | -4914.319294     | -4914.335136     |
| S <sub>3</sub>                                   | -4914.299345     | -4914.315180     | -4914.299727     | -4914.315643     |
| excitation energies from S <sub>0</sub> , in eV: |                  |                  |                  |                  |
| T <sub>1</sub>                                   | 3.30             | 3.35             | 3.28             | 3.33             |
| T <sub>2</sub>                                   | 3.51             | 3.56             | 3.48             | 3.53             |
| T <sub>3</sub>                                   | 3.69             | 3.74             | 3.67             | 3.72             |
| S <sub>1</sub>                                   | 3.76             | 3.81             | 3.74             | 3.78             |
| S <sub>2</sub>                                   | 3.95             | 3.99             | 3.93             | 3.97             |
| S <sub>3</sub>                                   | 4.48             | 4.52             | 4.46             | 4.50             |

<sup>a</sup> All energies calculated at CASPT2(10,12)/cT(D)-DK level for BP86 geometries, optimized either in gas phase or within the COSMO model of ethanol ( $\epsilon=24.55$ ); excitation energies calculated either in gas phase or within the PCM model (ethanol) with non-equilibrium solvation of excited states. <sup>b</sup> g/g = Geometry optimized and vertical excitations energy calculated in gas phase. <sup>c</sup> s/g = Energy calculation in solvent model for geometry optimized in gas phase. <sup>d</sup> g/s = Energies calculated in gas phase for geometry optimized in solvent model. <sup>e</sup> s/s = Energies calculated in solvent model for geometry optimized in solvent model.

Table S64. Estimate of spin-orbit coupling (SOC) effect on CASPT2 vertical excitation energies for RuCp<sub>2</sub>, ground state equilibrium geometry (S<sub>0</sub>). <sup>a</sup>

| spin state <sup>b</sup> | Total energies (a.u.) |              | Relative energies (eV) |          |                           |
|-------------------------|-----------------------|--------------|------------------------|----------|---------------------------|
|                         | without SOC           | with SOC     | without SOC            | with SOC | with SOC avg <sup>c</sup> |
| S <sub>0</sub>          | -4914.465545          | -4914.466094 | 0.00                   | 0.00     | 0.00                      |
| T <sub>1</sub>          | -4914.338346          | -4914.341244 | 3.46                   | 3.40     | 3.46                      |
|                         |                       | -4914.338535 |                        | 3.47     |                           |
| T <sub>2</sub>          | -4914.330417          | -4914.336982 | 3.68                   | 3.51     | 3.68                      |
|                         |                       | -4914.332222 |                        | 3.64     |                           |
|                         |                       | -4914.332018 |                        | 3.65     |                           |
| T <sub>3</sub>          | -4914.324093          | -4914.328816 | 3.85                   | 3.74     | 3.88                      |
|                         |                       | -4914.324800 |                        | 3.84     |                           |
|                         |                       | -4914.324321 |                        | 3.86     |                           |
| S <sub>1</sub>          | -4914.321782          | -4914.321481 | 3.91                   | 3.94     | 3.94                      |
| S <sub>2</sub>          | -4914.314461          | -4914.312656 | 4.11                   | 4.18     | 4.18                      |
| S <sub>3</sub>          | -4914.295363          | -4914.295247 | 4.63                   | 4.65     | 4.65                      |

<sup>a</sup> The SOC was included within the AMFI approximation, based on CASSCF(10,12) wave functions and CASPT2(10,12) energies, cT(D)-DK basis set, based on PBE0 geometry of S<sub>0</sub>. The S<sub>0</sub> (SS) and S<sub>1</sub>,S<sub>2</sub>,S<sub>3</sub> (SA6) and T<sub>1</sub>,T<sub>2</sub>,T<sub>3</sub> (SA6) data were supplied to the RASSI program and allowed to interact through the SOC Hamiltonian. Calculations were performed with the C<sub>s</sub> symmetry. <sup>b</sup> Dominant parentage for SOC states. <sup>c</sup> Average energy of SOC levels with common (dominant) parentage.

Table S65. Estate of spin-orbit coupling (SOC) effect on CASPT2 vertical energies of singlet and triplet states for RuCp2, lowest triplet state (T<sub>1</sub>) equilibrium geometry. <sup>a</sup>

| spin<br>state <sup>b,c</sup>        | Total energies (a.u.) |              | Relative energies (eV) |          |                           |
|-------------------------------------|-----------------------|--------------|------------------------|----------|---------------------------|
|                                     | without SOC           | with SOC     | without SOC            | with SOC | with SOC avg <sup>d</sup> |
| 1 <sup>1</sup> A' (S <sub>0</sub> ) | -4914.424436          | -4914.425319 | 0.00                   | 0.00     | 0.00                      |
|                                     |                       | -4914.357106 |                        | 1.86     |                           |
| 1 <sup>3</sup> A" (T <sub>1</sub> ) | -4914.355650          | -4914.356992 | 1.87                   | 1.86     | 1.87                      |
|                                     |                       | -4914.356111 |                        | 1.88     |                           |
|                                     |                       | -4914.348429 |                        | 2.09     |                           |
| 2 <sup>3</sup> A"                   | -4914.347507          | -4914.346741 | 2.09                   | 2.14     | 2.13                      |
|                                     |                       | -4914.346291 |                        | 2.15     |                           |
|                                     |                       | -4914.342209 |                        | 2.26     |                           |
| 3 <sup>3</sup> A''                  | -4914.341388          | -4914.341637 | 2.26                   | 2.28     | 2.27                      |
|                                     |                       | -4914.341560 |                        | 2.28     |                           |
|                                     |                       | -4914.338300 |                        | 2.37     |                           |
| 4 <sup>3</sup> A''                  | -4914.336534          | -4914.337176 | 2.39                   | 2.40     | 2.39                      |
|                                     |                       | -4914.337010 |                        | 2.40     |                           |
| 1 <sup>1</sup> A''                  | -4914.335390          | -4914.334363 | 2.42                   | 2.48     | 2.48                      |
|                                     |                       | -4914.329041 |                        | 2.62     |                           |
| 5 <sup>3</sup> A''                  | -4914.327839          | -4914.326666 | 2.63                   | 2.68     | 2.66                      |
|                                     |                       | -4914.326623 |                        | 2.69     |                           |
| 2 <sup>1</sup> A''                  | -4914.326245          | -4914.324633 | 2.67                   | 2.74     | 2.74                      |
| 3 <sup>1</sup> A''                  | -4914.323463          | -4914.322325 | 2.75                   | 2.80     | 2.80                      |
|                                     |                       | -4914.321173 |                        | 2.83     |                           |
| 6 <sup>3</sup> A''                  | -4914.321478          | -4914.321070 | 2.80                   | 2.84     | 2.84                      |
|                                     |                       | -4914.321037 |                        | 2.84     |                           |
| 4 <sup>1</sup> A''                  | -4914.316144          | -4914.315403 | 2.95                   | 2.99     | 2.99                      |
| 5 <sup>1</sup> A''                  | -4914.299330          | -4914.299112 | 3.40                   | 3.43     | 3.43                      |
| 6 <sup>1</sup> A''                  | -4914.296056          | -4914.295924 | 3.49                   | 3.52     | 3.52                      |

<sup>a</sup> The SOC was included within the AMFI approximation, based on CASSCF(10,12) wave functions and CASPT2(10,12) energies, cT(D)-DK basis set, based on PBE0 geometry of T<sub>1</sub>. The S<sub>0</sub> (SS) and S<sub>1</sub>,S<sub>2</sub>,S<sub>3</sub> (SA6) and T<sub>1</sub>,T<sub>2</sub>,T<sub>3</sub> (SA6) data were supplied to the RASSI program and allowed to interact through the SOC Hamiltonian. Calculations were performed under the C<sub>s</sub> symmetry. <sup>b</sup> Dominant parentage for SOC states. <sup>c</sup> Using irreps of C<sub>s</sub> (computational symmetry group); only S<sub>0</sub> and T<sub>1</sub> states are explicitly identified. <sup>d</sup> Average energy of SOC levels with common (dominant) parentage.

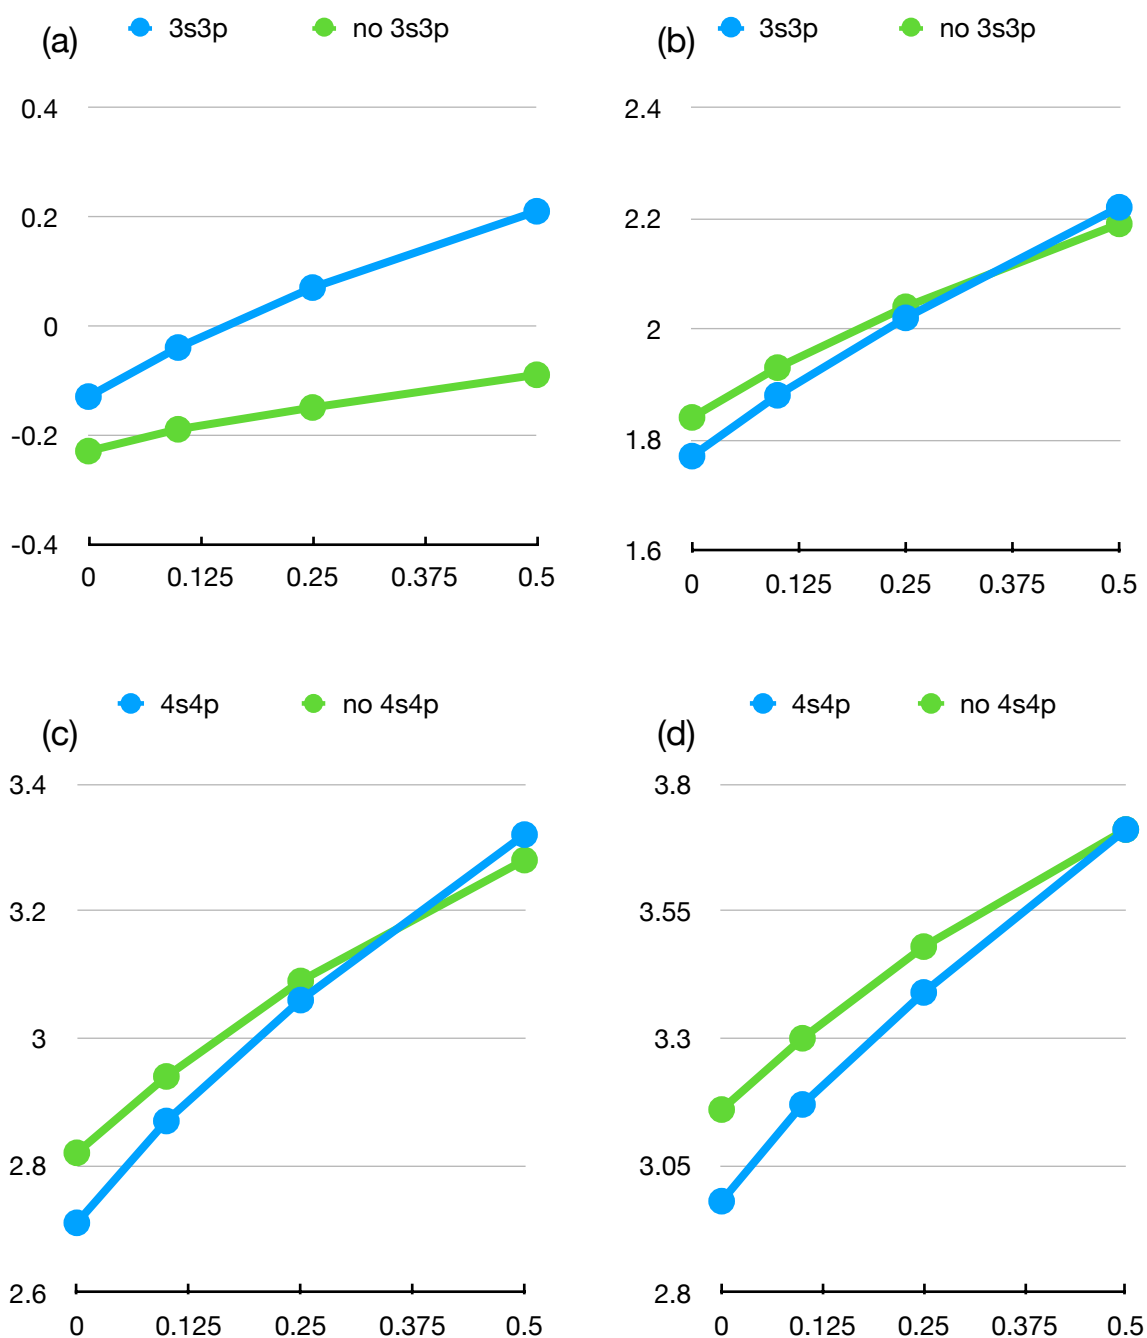

Figure S10: Dependence of CASPT2 relative energies (values in eV) on the IPEA shift parameter (values in au) for (a)  $^{2,6}[\text{MnCp}_2]$  (adiabatic energy), (b)  $^{1,3}[\text{FeCp}_2]$  (vertical excitation energy), (c)  $^{1,3}[\text{RuCp}_2]$  (adiabatic energy), (d)  $^{1,3}[\text{RuCp}_2]$  (vertical excitation energy) with the outer-core electrons (3s3p/4s4p) being either correlated or frozen at the CASPT2 level. Results were obtained from CASPT2(10,12)/cT(D)-DK (a, b) or CASPT2(10,12)fix/cT(D)-PP calculations.

## 8. Multireference character

Table S66. Diagnostics of multireference character

| Diagnostics                                 | Spin state <sup>a</sup> | MnCp <sub>2</sub>      | RuCp <sub>2</sub>      |                           |                           | FeCp <sub>2</sub>         | [CoCp <sub>2</sub> ] <sup>+</sup> |
|---------------------------------------------|-------------------------|------------------------|------------------------|---------------------------|---------------------------|---------------------------|-----------------------------------|
|                                             |                         | (adiab) <sup>f,i</sup> | (adiab) <sup>g,j</sup> | (vert abs) <sup>g,j</sup> | (vert emi) <sup>h,j</sup> | (vert abs) <sup>g,i</sup> | (vert abs) <sup>g,i</sup>         |
| T <sub>1</sub> <sup>b</sup>                 | lower                   | 0.035                  | 0.021                  | 0.021                     | 0.024                     | 0.044                     | 0.043                             |
|                                             | higher                  | 0.015                  | 0.030                  | 0.028                     | 0.021                     | 0.036                     | 0.033                             |
| D <sub>1</sub> <sup>b</sup>                 | lower                   | 0.148                  | 0.081                  | 0.081                     | 0.102                     | 0.193                     | 0.183                             |
|                                             | higher                  | 0.058                  | 0.163                  | 0.167                     | 0.091                     | 0.186                     | 0.166                             |
| T <sub>1</sub> <sup>KS</sup> <sup>b,c</sup> | lower                   | 0.009                  | 0.009                  | 0.009                     | 0.009                     | 0.009                     | 0.009                             |
|                                             | higher                  | 0.013                  | 0.010                  | 0.012                     | 0.010                     | 0.009                     | 0.011                             |
| D <sub>1</sub> <sup>KS</sup> <sup>b,c</sup> | lower                   | 0.021                  | 0.023                  | 0.023                     | 0.025                     | 0.021                     | 0.024                             |
|                                             | higher                  | 0.049                  | 0.027                  | 0.056                     | 0.024                     | 0.021                     | 0.047                             |
| C <sub>0</sub> <sup>2</sup> <sup>d</sup>    | lower                   | 0.891                  | 0.922                  | 0.922                     | 0.914                     | 0.868                     | 0.862                             |
|                                             | higher                  | 0.986                  | 0.924                  | 0.827                     | 0.929                     | 0.830                     | 0.877                             |
| M <sup>e</sup>                              | lower                   | 0.074                  | 0.039                  | 0.039                     | 0.047                     | 0.073                     | 0.099                             |
|                                             | higher                  | 0.014                  | 0.052                  | 0.257                     | 0.051                     | 0.199                     | 0.139                             |

<sup>a</sup> Lower spin state is the one with smaller value of  $S$  i.e. doublet for MnCp<sub>2</sub>, singlet for others; higher spin state - the one with larger value of  $S$ , i.e., sextet for MnCp<sub>2</sub>, triplet for others. <sup>b</sup> At UCCSD/cT(D)-DK level. <sup>c</sup> Using KS orbitals. <sup>d</sup> Weight of leading configuration in CASSCF(10,12) (state specific). <sup>e</sup> From occupation numbers of CASSCF(10,12) natural orbitals (state specific). <sup>f</sup> PBE0/def2TZVP geometry. <sup>g</sup> BP86/def2TZVP geometries, <sup>h</sup> UHF-CCSD(T) geometry. <sup>i</sup> cT(D)-DK basis set. <sup>j</sup> cT(D)-PP basis set.

(a) Fe–Cp antibonding orbitals ( $\phi_4, \phi_5$ )

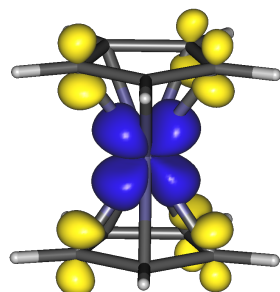

$$|\phi'_4|^2 - |\phi_4|^2$$

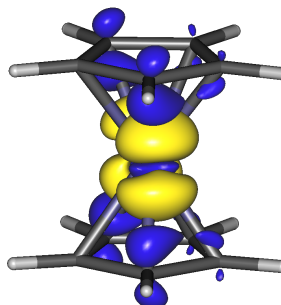

$$|\phi'_5|^2 - |\phi_5|^2$$

(b) Fe–Cp bonding orbitals ( $\beta_4, \beta_5$ )

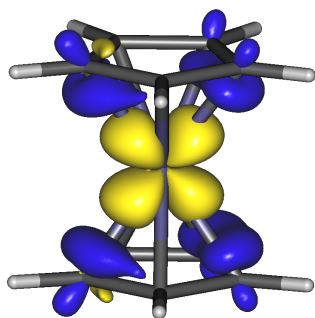

$$|\beta'_4|^2 - |\beta_4|^2$$

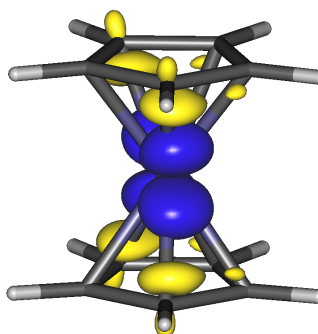

$$|\beta'_5|^2 - |\beta_5|^2$$

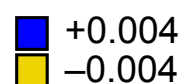

Figure S11. Contour plots of differences between SS and SA2(avg) orbitals for the  $T_1$  state (computed vertically for  $S_0$  geometry, BP86) of  $\text{FeCp}_2$  from CASSCF(10,12): (a) for orbitals  $\phi_4$  (singly occupied) and  $\phi_5$  (unoccupied) having antibonding character; (b) for corresponding bonding orbitals  $\beta_4$  and  $\beta_5$ . The quantity plotted is the difference between the squared module of an orbital from SS (with prime) and of the corresponding orbital from SA2 calculations (without prime).



## 9. Experimental spectrum of ferrocene

**Extended baseline correction:** the baselines of different measurements were adjusted to minimize the sum of squared deviations between the  $\varepsilon$  values obtained from different reliable measurements for the same wavelength, i.e.

$$\sum_{\lambda} \sum_{i \neq j} \left( \frac{A_i^{\lambda} - s_i}{c_i l_i} - \frac{A_j^{\lambda} - s_j}{c_j l_j} \right)^2 a_{ij}^{\lambda} = \min$$

where  $A_i^{\lambda}$  is the absorbance at wavelength  $\lambda$  obtained from the  $i$ -th measurement;  $c_i$  and  $l_i$  are the molar concentration and the cuvette path length for the  $i$ -th measurement;  $s_i$  is the unknown baseline shift for the  $i$ -th measurement (to be found); factor  $a_{ij}^{\lambda}$  serves to exclude unreliable measurements ( $a_{ij}^{\lambda} = 1$  if both  $A_i^{\lambda}$  and  $A_j^{\lambda}$  fall in range 0.05 to 2;  $a_{ij}^{\lambda} = 0$  otherwise). This is a typical least-squares problem, which leads to the linear system of equations for the vector of unknowns  $s_i$

$$\mathbf{M}\mathbf{s} = \mathbf{b},$$

with matrices  $\mathbf{M}$  and  $\mathbf{b}$  defined as

$$M_{ij} = \sum_{\lambda} \left( -\delta_{ij} \sum_{k \neq i} a_{ik}^{\lambda} + (1 - \delta_{ij}) a_{ij}^{\lambda} \right) \frac{1}{c_i c_j l_i l_j}$$

$$b_i = \sum_{\lambda} \sum_{k \neq i} \left( \frac{A_k^{\lambda}}{c_k l_k} - \frac{A_i^{\lambda}}{c_i l_i} \right) \frac{a_{ik}^{\lambda}}{c_i l_i}$$

( $\delta_{ij}$  is the Kronecker delta). This linear system is underdetermined with one free parameter. We choose this parameter to minimize the norm of the  $\mathbf{s}$  vector, i.e. to find the set of smallest possible baseline shifts which satisfy the least-squares problem.

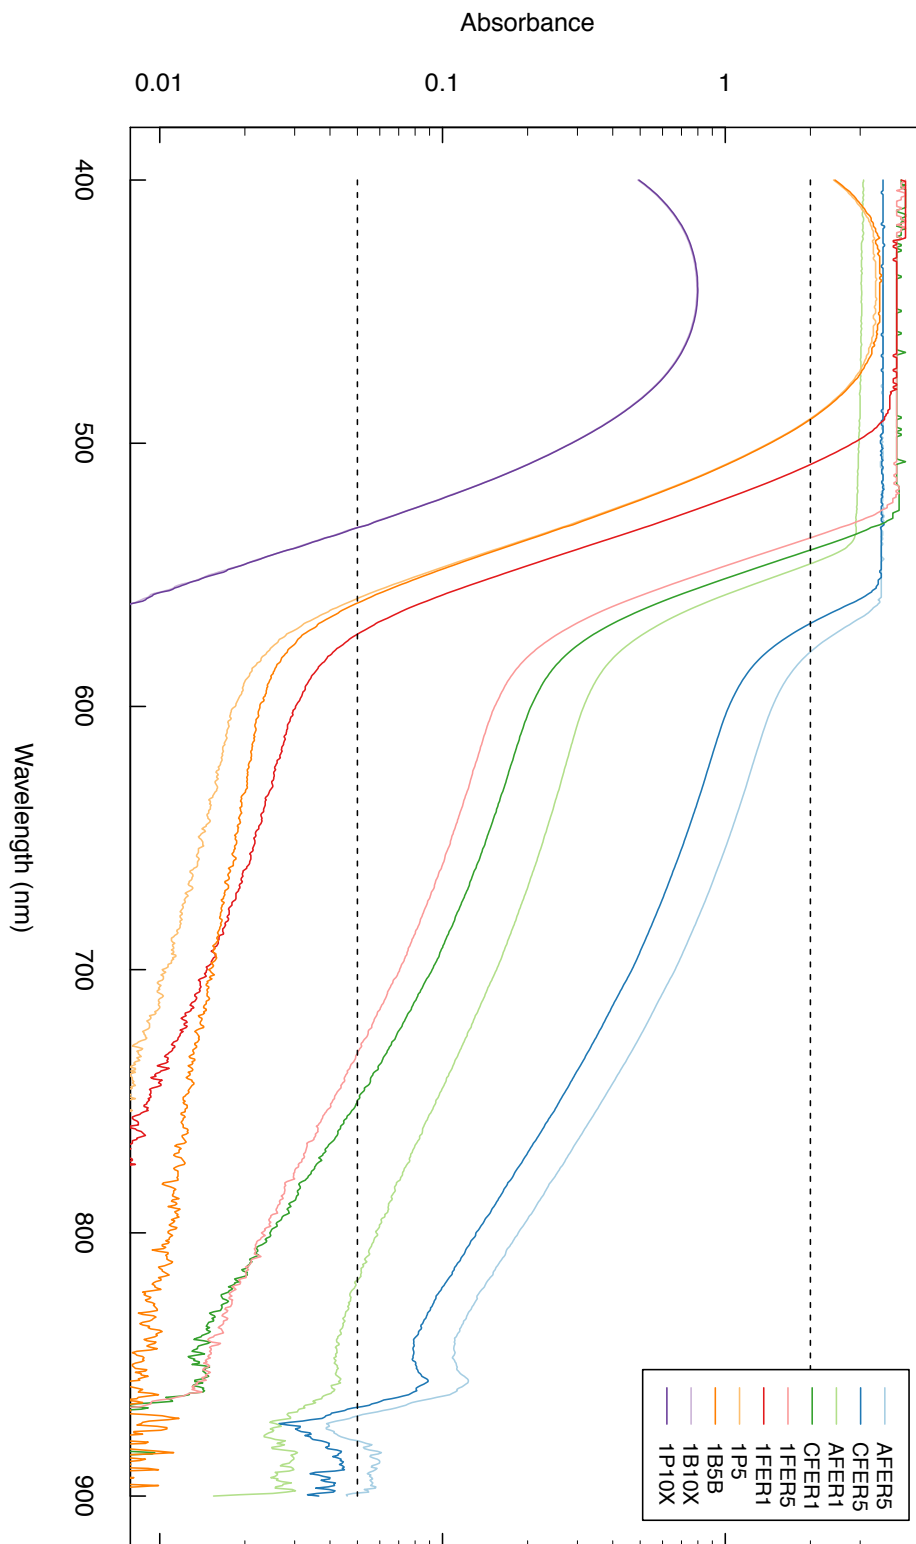

Figure S12. Absorbance spectra of ferrocene in benzene acquired for different concentrations and cuvette lengths (reported as “lab code”: molar concentration  $c$ , cuvette length): AFER5: 0.8029M, 5cm; AFER1: same  $c$ , 1cm; CFER5: 0.5595M, 5cm; CFER1: same  $c$ , 1cm; 1FER5: 0.08136M, 5cm; 1FER1: same  $c$ , 1cm; 1P5 and 1B5B: 0.008136M, 5cm; 1B10X and 1P10X: same  $c$ , 1cm. Dashed lines define reliable absorbance window 0.05 to 2.

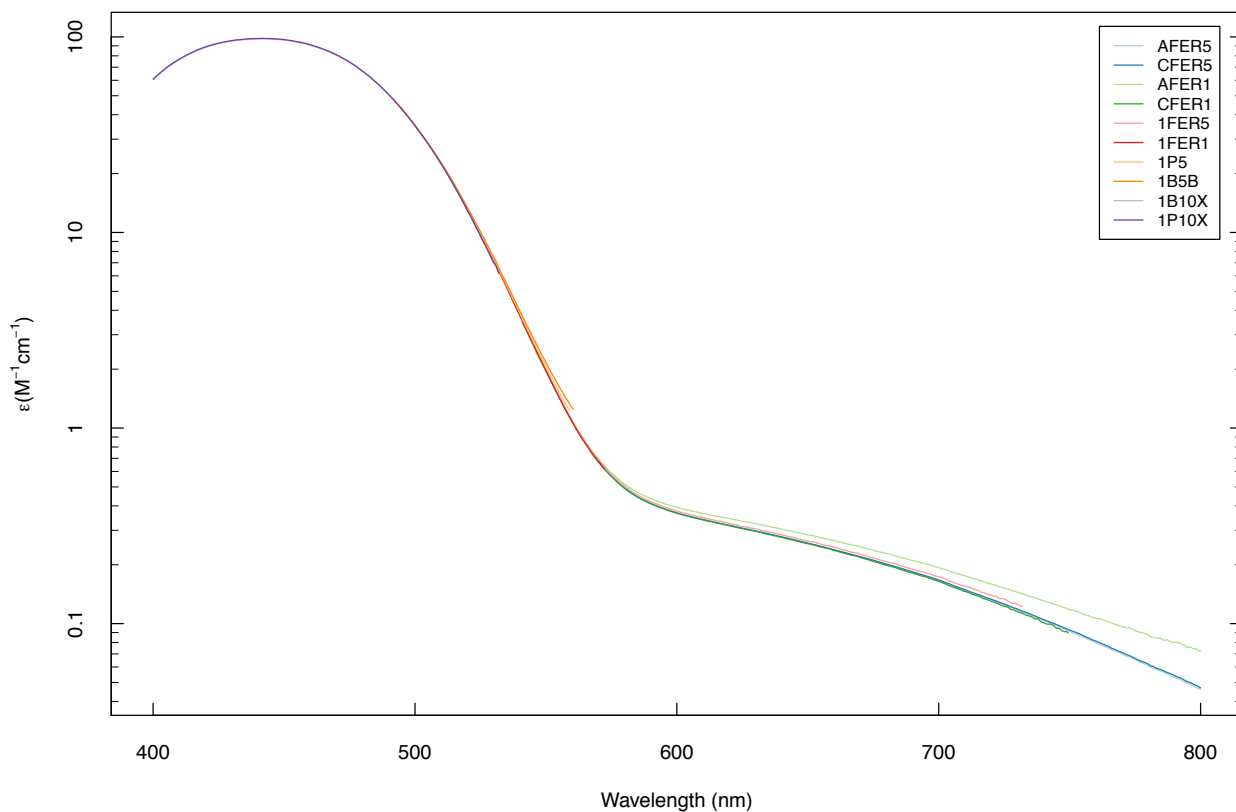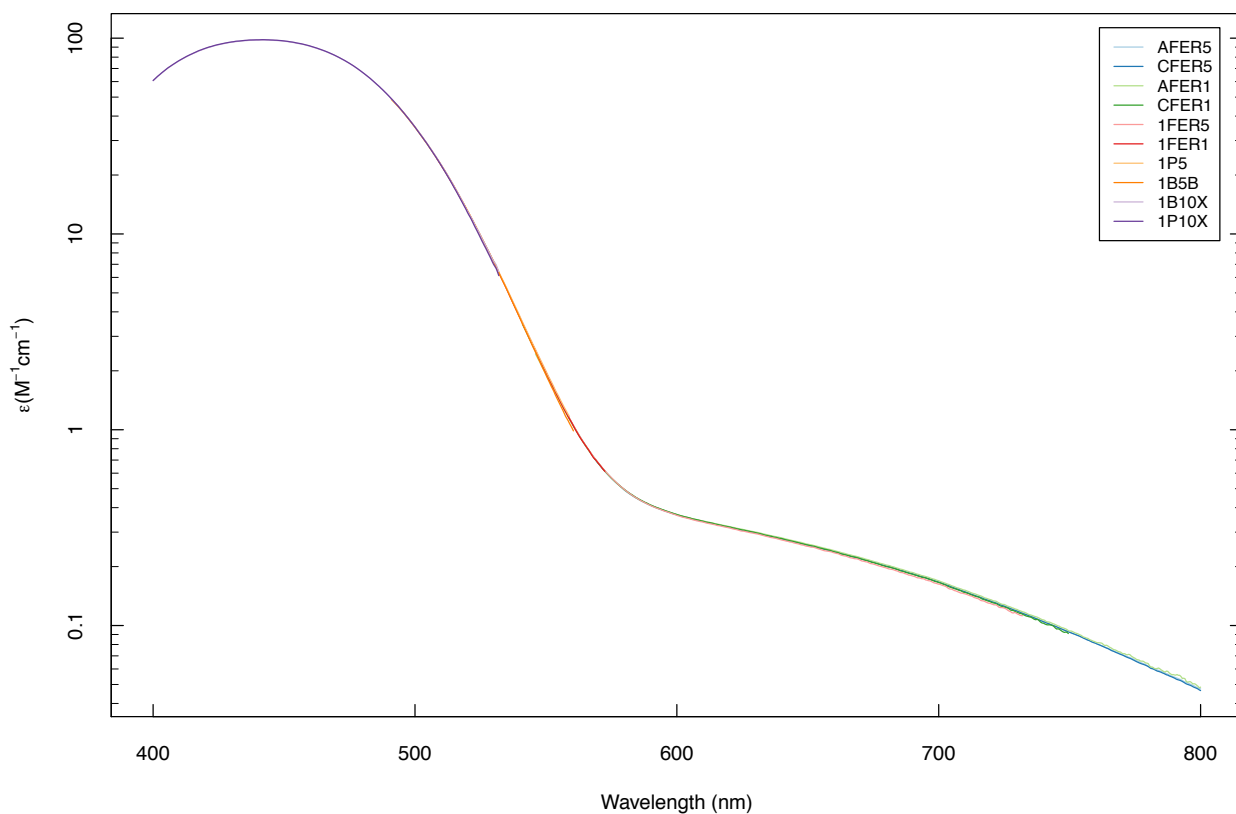

Figure S13. Overlapped extinction coefficient spectra from different measurements in the wavelength range 400-800 nm (excluding unreliable absorbances with  $A < 0.05$  or  $A > 2$ ). The spectral baselines are before the extended baseline correction (*top*) or after (*bottom*). See previous figure for description of experimental conditions corresponding to given “lab codes”.

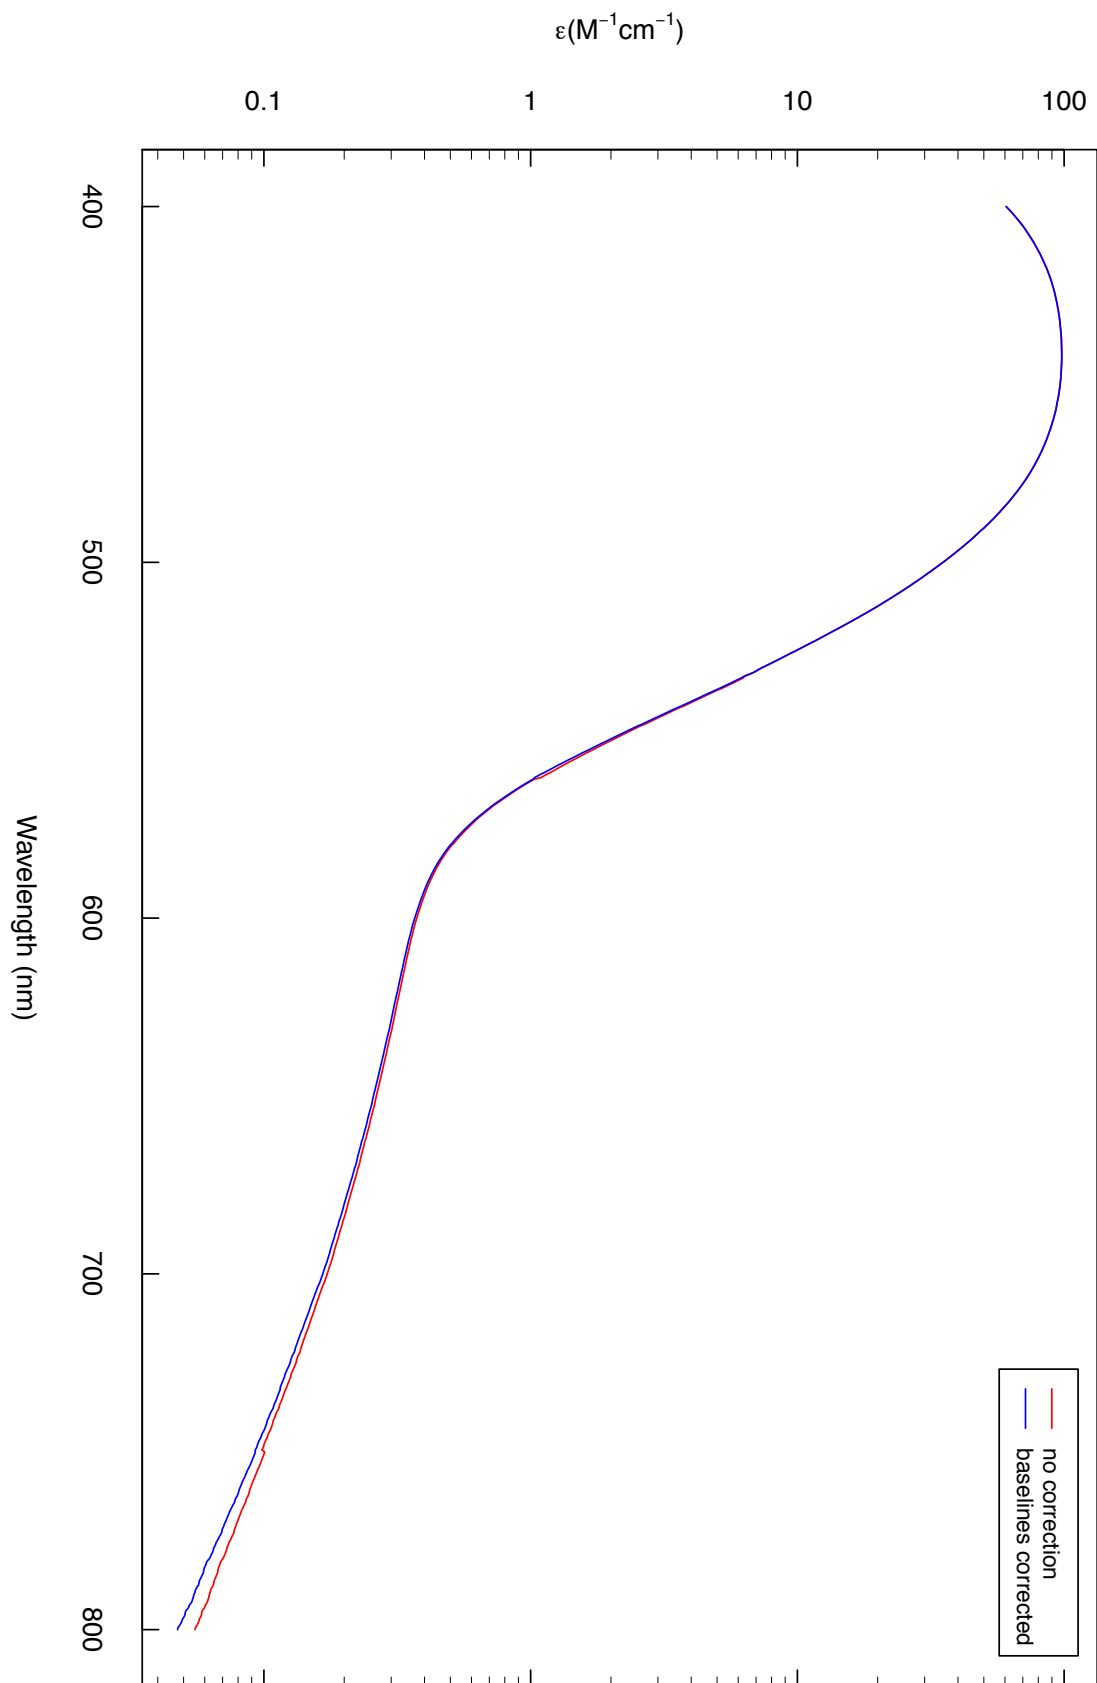

Figure S14. Averaged molar extinction coefficient spectrum of ferrocene in benzene obtained without (*red*) and with (*blue*) the extended baseline correction.

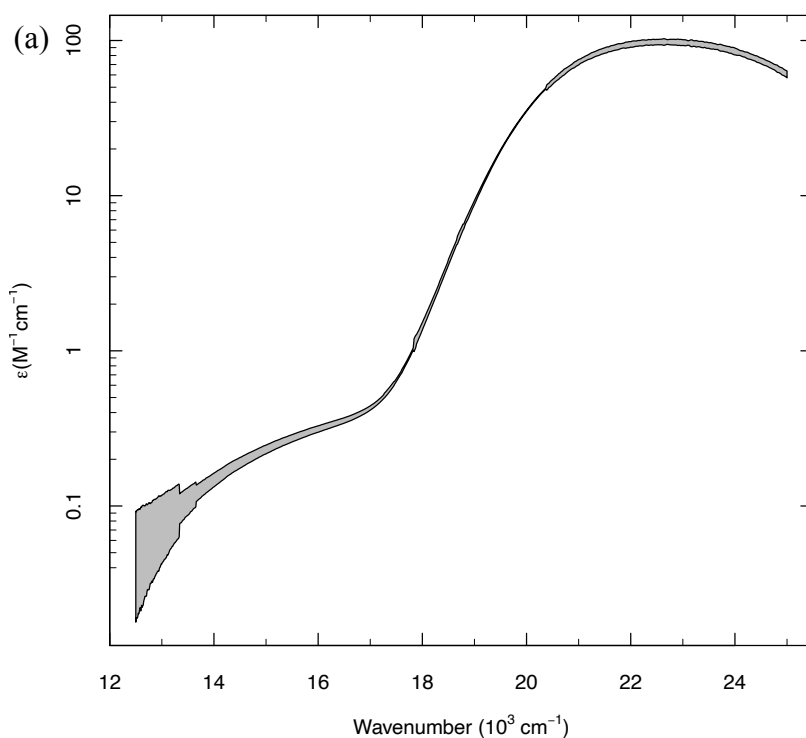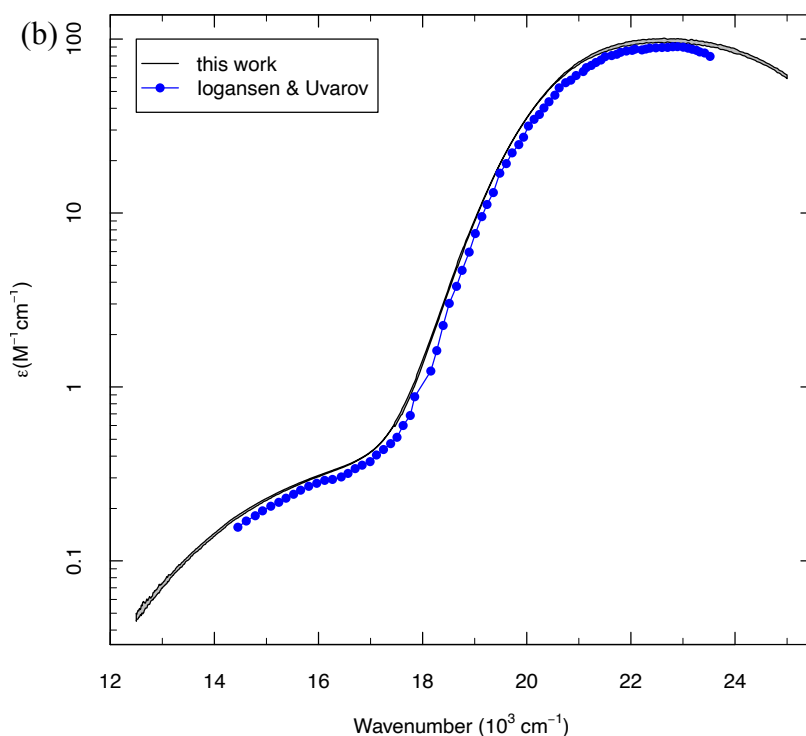

Figure S15. Averaged molar extinction coefficient spectrum of ferrocene in benzene with error estimation (shaded area is 95%-confidence interval) obtained without (a) or with (b) extended baseline correction. Figure (b) additionally contains the spectrum of ferrocene in ethanol digitalized from the paper by Iogansen and Uvarov (ref 29\*)

\*In ref. 29 the spectrum is split in two parts using different scales ( $\epsilon$  0-100 for range 400-550 nm, and  $\epsilon$  0-0.9 for range 560-700 nm). When presenting these data in Figure S15, the last two points of the first range were removed because they have huge relative errors (as corresponding to almost zero intensity in the appropriate scale). In fact, if these points were retained, there would appear an unphysical bump in the spectrum presented as a single plot in the log scale.

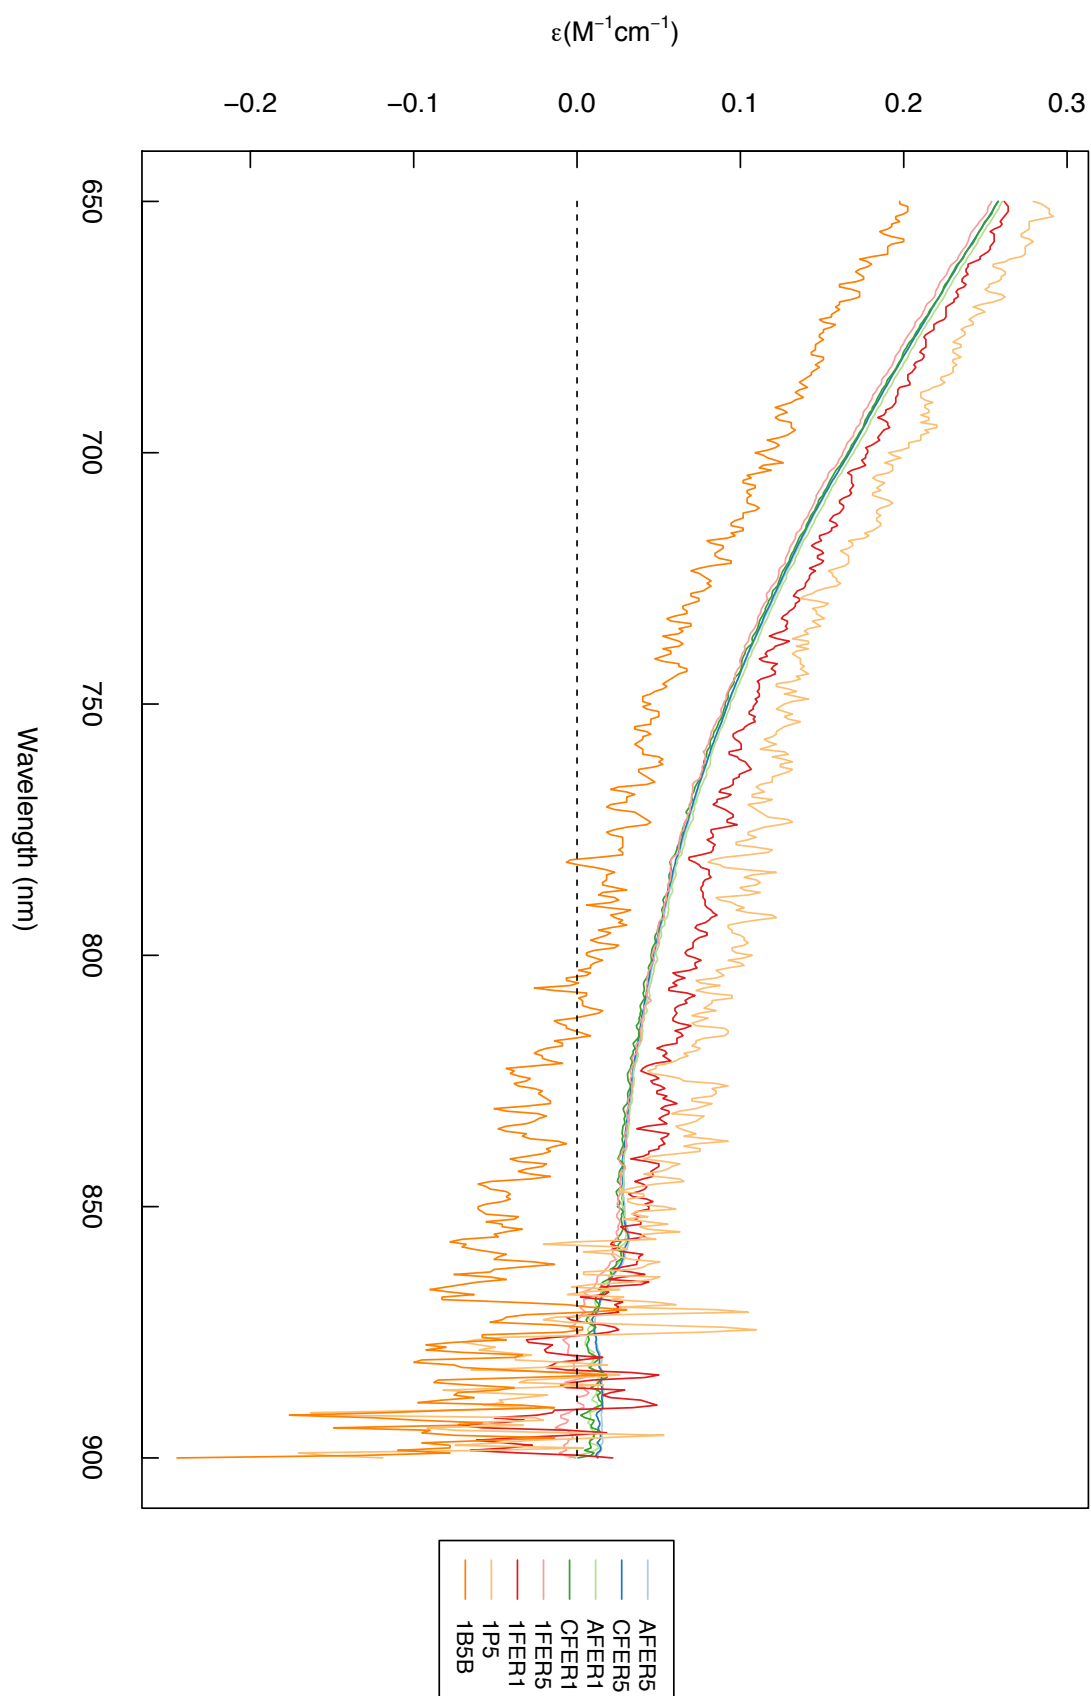

Figure S16. Absorbance tails in the low-energy region of ferrocene in benzene which is dominated by spectral noise. Note that the only data used by us to prepare the averaged spectrum were 1FER5 up to 732 nm, CFER1 up to 749.5 nm, and AFER5, AFER1, CFER5 up to 800 nm. All other (noisy) data or any data above 800 nm are not interpreted by us.

## 10. Additional references

### 10.1 Basis sets

#### **def2-TZVP, def2-TZVPP, def2-QZVPP**

- [S1] F. Weigend, M. Häser, H. Patzelt and R. Ahlrichs *Chem. Phys. Lett.*, 1998, **294**, 143-152.  
[S2] F. Weigend, F. Furche, R. Ahlrichs, *J. Chem. Phys.*, 2003, **119**, 12753-12762  
[S3] F. Weigend, R. Ahlrichs, *Phys. Chem. Chem. Phys.*, 2005, **7**, 3297-3305.

#### **STO TZ2P, TZ2P+**

- [S4] E. Van Lenthe and E. J. Baerends, *J. Comp. Chem.*, 2003, **24**, 1142-1156

#### **cc-pwCVTZ, cc-pwCVnZ-DK (n=T, Q, 5) for Mn, Fe, Co**

- [S5] N.B. Balabanov and K.A. Peterson, *J. Chem. Phys.*, 2006, **125**, 074110.

#### **cc-pwCVnZ-PP (n=T, Q, 5) for Ru**

- [S6] K.A. Peterson, D. Figgen, M. Dolg, M. and H. Stoll, *J. Chem. Phys.*, 2007, **126**, 124101

#### **cc-pVTZ, cc-pVDZ**

- [S7] T.H. Dunning, *J. Chem. Phys.*, 1989, **90**, 1007-1023.

#### **cc-pVnZ-DK (n=D, T, Q)**

- [S8] W.A. de Jong, R.J. Harrison, and D.A. Dixon, *J. Chem. Phys.*, 2001, **114**, 48-53.

#### **aug-cc-pVTZ/mp2fit for Fe**

- [S9] J. G. Hill and J. A. Platts, *J. Chem. Phys.*, 2008, **128**, 044104.

#### **aug-cc-pVTZ/mpf2fit for main-group elements**

- [S10] F. Weigend, A. Köhn, C. Hättig, *J. Chem. Phys.*, 2002, **116**, 3175-3183.

#### **def2-TZVPP/jkfit for Fe**

- [S11] F. Weigend, *J. Comp. Chem.* 2008, **29**, 167-175

#### **aug-cc-pVTZ/jkfit for main-group elements**

- [S12] F. Weigend, *Phys. Chem. Chem. Phys.* 2002, **4**, 4285-4291.

#### **aug-cc-pVTZ/optri for main-group elements**

- [S13] K.E. Yousaf and K.A. Peterson, *Chem. Phys. Lett.* 2009, **476**, 303-307.

#### **aug-cc-pVTZ-PP/mp2fit for Ru**

- [S14] J.G. Hill and J.A. Platts, *J. Chem. Theory Comput.* 2009, **5**, 500-505.

## 10.2 Density functionals

### PBE

[S15] J. P. Perdew, K. Burke and M. Ernzerhof, *Phys. Rev. Lett.*, 1996, **77**, 3865–3868.

### BLYP

[S16] A. D. Becke, *Phys. Rev. A.*, 1988, **38**, 3098–3100.

[S17] (a) C. Lee, W. Yang and R. G. Parr, *Phys. Rev. B*, 1988, **37**, 785–789; (b) B. Miehlich, A. Savin, H. Stoll and H. Preuss, *Chem. Phys. Lett.*, 1989, **157**, 200–206.

### OLYP, OPBE

[S18] N. C. Handy and A. J. Cohen, *Mol. Phys.*, 2001, **99**, 403–412.

### OPBE

[S19] M. Swart, A. R. Groenhof, A. W. Ehlers and K. Lammerstsma, *J. Phys. Chem. A*, 2004, **108**, 5479–5483.

### B97D

[S20] S. Grimme, *J. Comput. Chem.*, 2006, **27**, 1787–1799.

### TPSS

[S21] J. Tao, J. P. Perdew, V. N. Staroverov and G. E. Scuseria, *Phys. Rev. Lett.*, 2003, **91**, 146401.

### M06, M06L

[S22] Y. Zhao and D. G. Truhlar, *Theor. Chem. Acc.*, 2008, **120**, 215–241.

### MN15L

[S23] H. S. Yu, X. He and D. G. Truhlar, *J. Chem. Theory Comput.*, 2016, **12**, 1280–1293.

### MVS, MVSh

[S24] J. Sun, J. P. Perdew and A. Ruzsinszky, *Proc. Natl. Acad. Sci. U. S. A.*, 2015, **112**, 685–689.

### BR89

[S25] A. D. Becke and M. R. Roussel, *Phys. Rev. A: At., Mol., Opt. Phys.*, 1989, **39**, 3761–3767.

### PBE0

[S26] J. P. Perdew, M. Ernzerhof and K. Burke, *J. Chem. Phys.*, 1996, **105**, 9982–9985.

### B3LYP

[S27] (a) A. D. Becke, *J. Chem. Phys.*, 1993, **98**, 5648–5652; (b) P. J. Stephens, F. J. Devlin, C. F. Chabalowski and M. J. Frisch, *J. Phys. Chem.*, 1994, **98**, 11623–11627.

### TPSSH

[S28] J. P. Perdew, J. Tao, V. N. Staroverov and G. E. Scuseria, *J. Chem. Phys.*, 2004, **120**, 6898–6911.

### PW6B95

[S29] Y. Zhao and D. G. Truhlar, *J. Phys. Chem. A*, 2005, **109**, 5656–5667.



### **MN15**

[S30] H. S. Yu, X. He, S. L. Li and D. G. Truhlar, *Chem. Sci.*, 2016, 7, 5032–5051.

### **LC-wPBE**

[S31] T. M. Henderson, A. F. Izmaylov, G. Scalmani and G. E. Scuseria, *J. Chem. Phys.*, 2009, 131, 044108.

### **CAM-B3LYP**

[S32] T. Yanai, D. P. Tew and N. C. Handy, *Chem. Phys. Lett.*, 2004, 393, 51–57.

### **wB97XD**

[S33] J.-D. Chai and M. Head-Gordon, *Phys. Chem. Chem. Phys.*, 2008, 10, 6615–6620.

### **LC-BLYP**

[S34] H. Iikura, T. Tsuneda, T. Yanai and K. Hirao, *J. Chem. Phys.*, 2001, 115, 3540–3544.

### **M11**

[S35] R. Peverati and D. G. Truhlar, *J. Phys. Chem. Lett.*, 2011, 2, 2810–2817.

### **M11L**

[S36] R. Peverati and D. G. Truhlar, *J. Phys. Chem. Lett.*, 2012, 3, 117–124.

### **LH14t-calPBE**

[S37] A. V. Arbuznikov and M. Kaupp, *J. Chem. Phys.*, 2014, 141, 204101.

### **B2PLYP**

[S38] S. Grimme, *J. Chem. Phys.*, 2006, 124, 034108.

### **S12g, S12h**

[S39] M. Swart, *Chem. Phys. Lett.*, 2013, 580, 166–171.

### **B3LYP\***

[S40] M. Reiher, O. Salomon and B. A. Hess, *Theor. Chem. Acc.*, 2001, 107, 48–55.

## ***10.3 Computational packages (complete references from main article)***

[55] CFOUR, a quantum chemical program package written by J.F. Stanton, J. Gauss, L. Cheng, M.E. Harding, D.A. Matthews, P.G. Szalay with contributions from A.A. Auer, R.J. Bartlett, U. Benedikt, C. Berger, D.E. Bernholdt, Y.J. Bomble, O. Christiansen, F. Engel, R. Faber, M. Heckert, O. Heun, M. Hilgenberg, C. Huber, T.-C. Jagau, D. Jonsson, J. Jusélius, T. Kirsch, K. Klein, W.J. Lauderdale, F. Lipparini, T. Metzroth, L.A. Mück, D.P. O'Neill, D.R. Price, E. Prochnow, C. Puzzarini, K. Ruud, F. Schiffmann, W. Schwalbach, C. Simmons, S. Stopkiewicz, A. Tajti, J. Vázquez, F. Wang, J.D. Watts and the integral packages MOLECULE (J. Almlöf and P.R. Taylor), PROPS (P.R. Taylor), ABACUS (T. Helgaker, H.J. Aa. Jensen, P. Jørgensen, and J. Olsen), and ECP routines by A. V. Mitin and C. van Wüllen. For the current version, see <http://www.cfour.de>.

[56] E. J. Baerends, T. Ziegler, A. J. Atkins, J. Autschbach, D. Bashford, O. Baseggio, A. Bérces, F. M. Bickelhaupt, C. Bo, P. M. Boerritger, L. Cavallo, C. Daul, D. P. Chong, D. V. Chulhai, L. Deng, R. M. Dickson, J. M. Dieterich, D. E. Ellis, M. van Faassen, A. Ghysels, A. Giammona, S. J. A. van Gisbergen, A. Goetz, A. W. Götz, S. Gusarov, F. E. Harris, P. van den Hoek, Z. Hu, C. R. Jacob, H. Jacobsen, L. Jensen, L. Joubert, J. W. Kaminski, G. van Kessel, C. König, F. Kootstra, A. Kovalenko, M. Krykunov, E. van Lenthe, D. A. McCormack, A. Michalak, M. Mitoraj, S. M. Morton, J. Neugebauer, V. P. Nicu, L. Noodleman, V. P. Osinga, S. Patchkovskii, M. Pavanello, C. A. Peeples, P. H. T. Philipsen, D. Post, C. C. Pye, H. Ramanantoanina, P. Ramos, W. Ravenek, J. I. Rodríguez, P. Ros, R. Rüger, P. R. T. Schipper, D. Schlüns, H. van Schoot, G. Schreckenbach, J. S. Seldenthuis, M. Seth, J. G. Snijders, M. Solà, S. M., M. Swart, D. Swerhone, G. te Velde, V. Tognetti, P. Vernooijs, L. Versluis, L. Visscher, O. Visser, F. Wang, T. A. Wesolowski, E. M. van Wezenbeek, G. Wiesenekker, S. K. Wolff, T. K. Woo and A. L. Yakovlev, *ADF2017*, SCM, Theoretical Chemistry, Vrije Universiteit, Amsterdam, The Netherlands, <https://www.scm.com>.

[57] M. J. Frisch, G. W. Trucks, H. B. Schlegel, G. E. Scuseria, M. A. Robb, J. R. Cheeseman, G. Scalmani, V. Barone, G. A. Petersson, H. Nakatsuji, X. Li, M. Caricato, A. V. Marenich, J. Bloino, B. G. Janesko, R. Gomperts, B. Mennucci, H. P. Hratchian, J. V. Ortiz, A. F. Izmaylov, J. L. Sonnenberg, D. Williams-Young, F. Ding, F. Lipparini, F. Egidi, J. Goings, B. Peng, A. Petrone, T. Henderson, D. Ranasinghe, V. G. Zakrzewski, J. Gao, N. Rega, G. Zheng, W. Liang, M. Hada, M. Ehara, K. Toyota, R. Fukuda, J. Hasegawa, M. Ishida, T. Nakajima, Y. Honda, O. Kitao, H. Nakai, T. Vreven, K. Throssell, J. A. Montgomery, Jr., J. E. Peralta, F. Ogliaro, M. J. Bearpark, J. J. Heyd, E. N. Brothers, K. N. Kudin, V. N. Staroverov, T. A. Keith, R. Kobayashi, J. Normand, K. Raghavachari, A. P. Rendell, J. C. Burant, S. S. Iyengar, J. Tomasi, M. Cossi, J. M. Millam, M. Klene, C. Adamo, R. Cammi, J. W. Ochterski, R. L. Martin, K. Morokuma, O. Farkas, J. B. Foresman and D. J. Fox, *Gaussian 16 Revision B.01*, 2016, Gaussian Inc. Wallingford CT.

[61] H.-J. Werner, P. J. Knowles, G. Knizia, F. R. Manby, M. Schütz, P. Celani, W. Györffy, D. Kats, T. Korona, R. Lindh, A. Mitrushenkov, G. Rauhut, K. R. Shamasundar, T. B. Adler, R. D. Amos, A. Bernhardsson, A. Berning, D. L. Cooper, M. J. O. Deegan, A. J. Dobbyn, F. Eckert, E. Goll, C. Hampel, A. Hesselmann, G. Hetzer, T. Hrenar, G. Jansen, C. Köppl, Y. Liu, A. W. Lloyd, R. A. Mata, A. J. May, S. J. McNicholas, W. Meyer, M. E. Mura, A. Nicklass, D. P. O'Neill, P. Palmieri, D. Peng, K. Pflüger, R. Pitzer, M. Reiher, T. Shiozaki, H. Stoll, A. J. Stone, R. Tarroni, T. Thorsteinsson and M. Wang, MOLPRO, version 2015, a package of ab initio programs, see <http://www.molpro.net>.

[63] Aquilante, F.; Autschbach, J.; Baiardi, A.; Battaglia, S.; Borin, V. A.; Chibotaru, L. F.; Conti, I.; De Vico, L.; Delcey, M.; Fdez. Galván, I.; Ferré, N.; Freitag, L.; Garavelli, M.; Gong, X.; Knecht, S.; Larsson, E. D.; Lindh, R.; Lundberg, M.; Malmqvist, P. Å.; Nenov, A.; Norell, J.; Odelius, M.; Olivucci, M.; Pedersen, T. B.; Pedraza-González, L.; Phung, Q. M.; Pierloot, K.; Reiher, M.; Schapiro, I.; Segarra-Martí, J.; Segatta, F.; Seijo, L.; Sen, S.; Sergentu, D.-C.; Stein, C. J.; Ungur, L.; Vacher, M.; Valentini, A. & Veryazov, V. "Modern quantum chemistry with [Open]Molcas" *J. Chem. Phys.*, 2020, **152**, 214117.
